# Supplementary material for: Comparison and influence of 1011 and 1013 ohm resistors used for MC-ICP-MS determination of isotope ratios in highly enriched silicon
Source: Royal Society of Chemistry journal article supplement (doi:10.1039/d4ja00066h), 2024-01-01
Supplement: d4ja00066h1.xlsx [file d4ja00066h1.xlsx]

## Sheet: MM N21 1011 rot
Molar Mass calculation (overview)
		molar masses of Si isotopes		M(29Si)	28.9765	g/mol			blue: measured quantities
		(AME 2020)		M(30Si)	29.9738	g/mol
				M(28Si)	27.9769	g/mol
10^11 Ohm, rot. amplifiers		Meng Wang et al 2021 Chinese Phys. C 45 030003
sample	run	Ry,2true	Ry,3true	Rw,2true	Rw,2meas	u(Rw,2meas)	K2	u(K2)	mx1	myx1	Rxmeas	Rx	u(Rx)	Rbxmeas	Rbx	u(Rbx)	M(Si28)	u(M)	urel(M)	wy	wimp	x(28Si)	u(x(28Si))	x(29Si)	u(x(29Si))	x(30Si)	u(x(30Si))			M_av(Si28)	M_av + u	M_av - u
SIS code	sequence	mol/mol	mol/mol	mol/mol	V/V	V/V	1	1	g	g	V/V	mol/mol	mol/mol	V/V	mol/mol	mol/mol	g/mol	g/mol		g/g	g/g	mol/mol	mol/mol	mol/mol		mol/mol				g/mol	g/mol	g/mol
Si28-33Pr11 N.2.1	1	269.039	1.58552	0.662302	0.695418	3.25622e-05	0.95238	0.00191	0.062475	5.61102e-06	0.0110643	0.0105374	0.000155173	3.77498	3.59521	0.00323459	27.9769	5.29e-08	1.89084e-09	0.994549	2.394e-05	0.999977	5.24e-08	2.2865e-05	5.21e-08	2.40938e-07	3.39e-09	1		27.9769	27.977	27.9769
Si28-33Pr11 N.2.1	2	269.039	1.58552	0.662302	0.698084	2.78601e-05	0.948742	0.0019	0.062475	5.61102e-06	0.0165419	0.015694	0.000833065	3.79651	3.60191	0.0020588	27.977	6.43e-08	2.29832e-09	0.994549	2.40554e-05	0.999977	5.44e-08	2.28546e-05	4.94e-08	3.5868e-07	1.82e-08	1		27.9769	27.977	27.9769
Si28-33Pr11 N.2.1	3	269.039	1.58552	0.662302	0.700809	0.000112333	0.945053	0.0019	0.062475	5.61102e-06	0.013032	0.0123159	0.000503223	3.79184	3.58349	0.00183351	27.977	5.55e-08	1.98378e-09	0.994549	2.40753e-05	0.999977	5.15e-08	2.29524e-05	4.95e-08	2.8268e-07	1.09e-08	1		27.9769	27.977	27.9769
Si28-33Pr11 N.2.1	4	269.039	1.58552	0.662302	0.698288	8.8309e-05	0.948465	0.0019	0.062475	5.61102e-06	0.0124665	0.011824	0.000405224	3.79034	3.59501	0.00179107	27.9769	5.33e-08	1.90514e-09	0.994549	2.39815e-05	0.999977	5.06e-08	2.28745e-05	4.93e-08	2.70469e-07	8.82e-09	1		27.9769	27.977	27.9769
Si28-33Pr11 N.2.1	5	269.039	1.58552	0.662302	0.700459	0.000174943	0.945525	0.00191	0.062475	5.61102e-06	0.0113268	0.0107098	0.000124551	3.80633	3.59898	0.0010556	27.9769	4.9e-08	1.75144e-09	0.994549	2.39199e-05	0.999977	4.87e-08	2.28417e-05	4.85e-08	2.4463e-07	2.7e-09	1		27.9769	27.977	27.9769
Si28-33Pr11 N.2.1	6	269.039	1.58552	0.662302	0.702522	5.96196e-05	0.942749	0.00189	0.062475	5.61102e-06	0.0101228	0.00954322	0.000146785	3.80108	3.58347	0.00133615	27.9769	4.94e-08	1.76574e-09	0.994549	2.39887e-05	0.999977	4.9e-08	2.29348e-05	4.88e-08	2.18872e-07	3.18e-09	1		27.9769	27.977	27.9769
average					0.699263	9.69648e-05	0.947152	0.00190168				0.0117707	0.000442074		3.59301	0.00200709	27.9769	5.43068e-08	1.94113e-09			0.999977	5.11378e-08	2.28871e-05	4.96138e-08	2.69378e-07	9.63273e-09
						0.000138667		0.00200779					0.037557			0.00055861
											average	0.0117707			3.59301
											N	6			6
											sdv (Stabw)	0.00215874			0.00781478
											sdv/(N)^1/2	0.000881301			0.00319037
											rel.sdv/(N)^1/2	0.0748722			0.000887938
											u(M)incl sdv	0.000985962	0.0837638		0.0037692	0.00104904
													0.0837638			0.00104904

## Sheet: raw data  1011 rot 1 seq
	raw data: sample and IDMS measurement
	sample: Si28-33Pr11 Part N.2.1
	Sequence 1
	10^11 Ohm, rot. amplifiers
		sample (x, Si28)
		Si28_01		bl_01		30Si/29Si-corr_01	Si28_02		bl_02		30Si/29Si-corr_02	Si28_03		bl_03		30Si/29Si-corr_03	Si28_04		bl_04		30Si/29Si-corr_04
	Cycle	29.073	30.083	29.073	30.083		29.073	30.083	29.073	30.083		29.073	30.083	29.073	30.083		29.073	30.083	29.073	30.083
	1	0.128817	0.00154762	0.000148607	0.000159706	0.0111427	0.147887	0.00176486	0.00012914	0.000113159	0.0111919	0.172066	0.00203648	0.000109301	0.000110458	0.0112501	0.177537	0.00205238	0.000130945	0.0001273	0.0109356
	2	0.130737	0.00158836	0.000131421	0.000119478	0.0112908	0.148601	0.0017735	0.000127048	9.36862e-05	0.0111963	0.172476	0.00203225	0.00012849	0.000115758	0.0111988	0.177392	0.00201634	0.000124608	0.000131706	0.0107412
	3	0.12642	0.00150495	0.000130674	0.000126595	0.0110164	0.151602	0.00180449	0.000156698	7.20106e-05	0.0111791	0.171636	0.0020208	0.000144421	0.000106141	0.011187	0.178215	0.00203613	0.000131304	0.0001167	0.0108027
	4	0.126346	0.00155564	0.000118287	0.000131385	0.0114244	0.153816	0.0018288	0.000126022	0.000151599	0.0111762	0.171882	0.00202648	0.000124185	9.13646e-05	0.011204	0.178266	0.00202587	0.00010601	9.14214e-05	0.010742
	5	0.127497	0.00152735	0.000109622	0.000111507	0.0110991	0.15276	0.00178707	0.000104762	6.13121e-05	0.0109802	0.170801	0.00201047	0.000101377	0.000110742	0.0111812	0.178472	0.0020794	0.00012724	7.75513e-05	0.0110297
	6	0.129331	0.00154863	0.000128768	0.000125967	0.0111063	0.152093	0.0017925	0.000125605	0.000159668	0.011064	0.171173	0.00199046	8.06534e-05	8.93032e-05	0.0110399	0.178604	0.0020601	0.000122268	8.936e-05	0.0109134
	7	0.130767	0.0015661	0.000112833	0.000138415	0.0111178	0.154309	0.00182317	0.000129424	0.000157565	0.011104	0.173859	0.0020647	0.000101936	0.000113007	0.0112964	0.180271	0.00204022	0.000137804	0.000139434	0.0107021
	8	0.128802	0.00156726	0.000117544	0.00012096	0.0112967	0.155694	0.00185553	0.000113404	0.000104721	0.0112131	0.172862	0.00200995	9.84321e-05	0.000133122	0.0110447	0.180549	0.00203597	0.000136449	9.88444e-05	0.0106621
	9	0.129179	0.0016022	0.000145344	9.5136e-05	0.0115343	0.154763	0.00184982	0.000100918	0.000125045	0.0112437	0.173214	0.00202287	0.000111154	0.000116624	0.0110969	0.179634	0.00208507	9.40423e-05	0.000117973	0.0109899
	10	0.135065	0.0016232	0.000121647	0.000120461	0.0111869	0.157594	0.00186391	0.000124089	0.000113367	0.011131	0.175789	0.00203848	0.000131329	8.80971e-05	0.0110231	0.179534	0.00206293	0.000100608	0.000104224	0.0108727
	11	0.137545	0.00164638	0.000120272	9.16979e-05	0.0111537	0.159233	0.00191418	0.000115511	7.83822e-05	0.0113323	0.175896	0.00204393	0.000114591	9.81014e-05	0.0110474	0.180452	0.00205029	0.000113012	0.000129205	0.0107472
	12	0.136082	0.00165949	0.000132557	7.24934e-05	0.0113701	0.16145	0.00186721	0.000117991	0.000141833	0.0108854	0.174952	0.00203213	0.000136351	6.50219e-05	0.0110396	0.180648	0.00209123	0.000132619	9.04083e-05	0.0109624
	13	0.138472	0.00165623	0.000123587	0.000120607	0.0111502	0.163815	0.00193022	9.08278e-05	8.42806e-05	0.0111131	0.166377	0.0019578	8.03854e-05	0.000103173	0.0111619	0.174081	0.00196601	0.000122149	9.48963e-05	0.0106563
	14	0.139149	0.00168285	0.000104829	0.000107237	0.0112873	0.165182	0.00193075	0.000116345	0.000130013	0.0110242	0.165811	0.00191512	0.000108791	8.43854e-05	0.0109425	0.170825	0.00193441	0.000111936	9.46901e-05	0.0106744
	15	0.138122	0.00167554	8.43734e-05	7.99394e-05	0.0113184	0.166484	0.00196706	0.000134002	0.000113758	0.0111563	0.167998	0.00193894	9.70593e-05	9.44566e-05	0.0109417	0.170665	0.00194148	0.000111965	0.000119692	0.010726
	16	0.136532	0.00167857	0.000102732	0.000116925	0.0114724	0.162492	0.0018765	0.00013549	0.000104183	0.0108728	0.174232	0.00204693	0.00011027	0.000106641	0.0111702	0.169955	0.00195155	9.63982e-05	0.000176318	0.0108301
	17	0.138591	0.00164823	0.000131032	0.000106434	0.0110828	0.163889	0.00192269	0.000117969	9.5007e-05	0.0110621	0.173203	0.00202883	0.00010279	0.000112678	0.0111321	0.168191	0.00193725	9.76644e-05	0.000114476	0.0108586
	18	0.137804	0.00164584	0.00013271	0.000100008	0.0111288	0.164253	0.00191793	0.000129895	9.99385e-05	0.0110086	0.172441	0.00199266	0.000113156	9.618e-05	0.0109713	0.166902	0.00190377	9.81356e-05	0.000105151	0.0107419
	Cup	C	H3	C	H3		C	H3	C	H3		C	H3	C	H3		C	H3	C	H3
	Info	tbdgy	tbdgy	tbdgy	tbdgy		tbdgy	tbdgy	tbdgy	tbdgy		tbdgy	tbdgy	tbdgy	tbdgy		tbdgy	tbdgy	tbdgy	tbdgy
	Mean	0.13307	0.00160691	0.000122047	0.000113608		0.157551	0.00185946	0.000121952	0.000111085		0.172037	0.00201163	0.000110815	0.000101959		0.176122	0.00201502	0.000116398	0.000112186
	StdErr (%)	0.844306	0.839773	3.0097	4.3577		0.890353	0.77714	2.8324	6.14166		0.391708	0.461072	3.69503	3.56646		0.62624	0.696242	3.02837	4.93829
		isotope ratio (blank corrected)		30/29				not-blank corr
		1		0.0112322				0.0120757
		2		0.0111075				0.0118022
		3		0.0111072				0.011693
		4		0.0108105				0.0114411
		average		0.0110643	V/V			0.011753
				0.00809713				0.0111876
			S1	0.0140246	urel			0.0193774
		IDMS blend (bx)
		idms_01		bl_05		30Si/29Si-corr_01	idms_02		bl_06		30Si/29Si-corr_02	idms_03		bl_07		30Si/29Si-corr_03	idms_04		bl_08		30Si/29Si-corr_04
	Cycle	29.073	30.083	29.073	30.083		29.073	30.083	29.073	30.083		29.073	30.083	29.073	30.083		29.073	30.083	29.073	30.083
	1	0.0637145	0.239987	0.000125544	0.000163051	3.77236	0.0668718	0.251897	0.000112311	0.000101143	3.77276	0.0656215	0.247437	0.000105522	0.000126655	3.77689	0.0551618	0.208172	0.000131812	0.000138273	3.78034
	2	0.0656016	0.246984	0.000137231	0.000120144	3.7705	0.0669365	0.252156	0.000147162	0.000172664	3.77299	0.0653548	0.246093	0.000124173	0.000161433	3.77173	0.0554015	0.209147	0.000113669	9.9713e-05	3.78157
	3	0.0660742	0.248789	0.000157825	0.000151379	3.77085	0.0679551	0.255958	0.000133831	0.000134938	3.77237	0.0655101	0.246783	0.000143302	0.000159289	3.77332	0.0558807	0.210949	0.000140211	0.00013068	3.78139
	4	0.0670717	0.252625	0.000110437	0.000119537	3.77196	0.0661732	0.249115	0.000120259	0.00012681	3.77055	0.0625403	0.235709	0.000134635	0.000131007	3.77544	0.0534086	0.201473	0.000139732	0.000154479	3.779
	5	0.0672785	0.253547	0.000145245	0.00015302	3.77408	0.065293	0.245934	0.000155722	0.000130786	3.77266	0.0614352	0.231661	0.000185165	0.000122791	3.77746	0.0534796	0.20183	0.000120496	0.000133099	3.78067
	6	0.0663787	0.24988	0.000156709	0.000148338	3.76999	0.0674657	0.254239	0.000125976	0.000154139	3.77426	0.0634195	0.239068	0.000140322	0.0001298	3.77607	0.0522199	0.197243	7.61909e-05	0.000116608	3.78402
	7	0.062164	0.234049	0.000108641	0.000118341	3.77092	0.0690666	0.260267	0.000134614	9.42581e-05	3.77406	0.0629616	0.237209	0.00012656	0.000120018	3.77399	0.0521101	0.196458	0.000143053	0.000158025	3.77691
	8	0.0610043	0.229748	0.000126546	8.74962e-05	3.7721	0.0693309	0.2611	0.000133672	0.000129617	3.77168	0.0616784	0.23247	0.000130654	0.000139955	3.77569	0.0523835	0.197484	0.000120554	0.00014045	3.77678
	9	0.0598754	0.225341	8.97945e-05	0.000135079	3.76963	0.0684031	0.257679	0.000167892	0.000128033	3.77283	0.0605857	0.228424	0.000128062	0.000142346	3.777	0.0526396	0.198496	0.000129212	0.000140868	3.77764
	10	0.0633684	0.238669	0.000131731	0.000122288	3.77216	0.0638498	0.240486	0.000106841	0.00011213	3.7726	0.0579886	0.21845	0.000156693	0.000119271	3.77415	0.0536648	0.202462	0.000184957	0.000139523	3.77939
	11	0.0632527	0.238163	0.000139772	8.98032e-05	3.77105	0.0636689	0.239866	0.000142021	0.000117847	3.77359	0.0584862	0.220516	0.00014674	0.000167716	3.77736	0.0538253	0.202945	0.000146936	0.00014262	3.77707
	12	0.0652605	0.24579	0.000122824	0.000145572	3.7719	0.0638444	0.240464	0.000115718	7.68767e-05	3.77259	0.0592725	0.22338	0.000143392	0.000171289	3.77558	0.0528818	0.199446	0.000141077	0.000119901	3.7783
	13	0.0611586	0.230392	0.000136104	0.000116887	3.77313	0.0683289	0.257553	0.000126899	0.000143272	3.77509	0.0627787	0.236719	0.000197014	0.000176771	3.77719	0.0536644	0.202595	0.000125856	0.000153007	3.78189
	14	0.0598247	0.225349	0.000118	0.000123483	3.77296	0.0685467	0.258184	0.000175284	0.000187918	3.7723	0.0638305	0.240663	0.000174743	0.000171146	3.77674	0.0526322	0.198822	0.000130412	0.000140314	3.78437
	15	0.058571	0.220224	0.000118238	0.000143979	3.76619	0.0692298	0.260789	0.0001534	0.000181733	3.7727	0.0631645	0.238064	0.000161671	0.000150679	3.7754	0.0514234	0.194165	0.00010677	0.000116932	3.78277
	16	0.0652521	0.245608	0.000127429	0.000111586	3.76961	0.0723526	0.272774	0.000141181	0.000116226	3.77552	0.0641306	0.241796	0.000147852	0.00015215	3.77672	0.0513257	0.193619	0.000134542	0.000128583	3.77932
	17	0.067277	0.253491	0.000162356	0.000161621	3.77332	0.0717866	0.27043	0.000181704	0.000156159	3.77263	0.0642981	0.242525	0.000129535	0.000114429	3.77824	0.0515616	0.194417	0.000154391	0.000153272	3.77751
	18	0.0687326	0.258708	0.000153462	0.000121031	3.7693	0.0715512	0.269683	0.000142153	0.000132277	3.7746	0.0638249	0.240499	0.000155008	0.000135979	3.77449	0.0515527	0.194416	0.00010848	0.000129869	3.77814
	Cup	C	H3	C	H3		C	H3	C	H3		C	H3	C	H3		C	H3	C	H3
	Info	tbdgy	tbdgy	tbdgy	tbdgy		tbdgy	tbdgy	tbdgy	tbdgy		tbdgy	tbdgy	tbdgy	tbdgy		tbdgy	tbdgy	tbdgy	tbdgy
	Mean	0.0639923	0.240964	0.000131549	0.000129591		0.0678142	0.255476	0.000139813	0.000133157		0.0626045	0.23597	0.000146169	0.00014404		0.0530676	0.20023	0.000130464	0.000135345
	StdErr (%)	1.10995	1.11412	3.44643	4.02723		0.911325	0.915745	3.55759	5.21369		0.866792	0.866241	3.69036	3.32817		0.610615	0.614938	4.10496	2.66291
		isotope ratio (blank corrected)		30/29				not-blank corr
		1		3.77122				3.76551
		2		3.7731				3.7673
		3		3.77575				3.76922
		4		3.77984				3.77311
		average		3.77498	V/V			3.76879
				0.000494703				0.000431817
			S1	0.000856851	urel			0.00074793
		material w (WASO04)				material: WASO04 41963/04/72-75 part Mi 2.08
		waso_01		bl_09		30Si/29Si-corr_01	waso_02		bl_10		30Si/29Si-corr_02	waso_03		bl_11		30Si/29Si-corr_03	waso_04		bl_12		30Si/29Si-corr_04
	Cycle	29.073	30.083	29.073	30.083		29.073	30.083	29.073	30.083		29.073	30.083	29.073	30.083		29.073	30.083	29.073	30.083
	1	0.209819	0.145935	0.000135435	0.000126312	0.695266	0.206821	0.143853	0.000188128	0.000163445	0.695409	0.203749	0.141713	0.000215845	0.000171082	0.695369	0.198582	0.138134	0.000231858	0.000231688	0.695445
	2	0.209321	0.145626	0.00012043	0.000103504	0.695448	0.205768	0.143126	0.000182418	0.000163266	0.695436	0.200646	0.139536	0.000175253	0.000199872	0.695272	0.198707	0.1382	0.000224325	0.00016902	0.695337
	3	0.210328	0.146306	9.78045e-05	0.000173388	0.695346	0.207206	0.14413	0.000189024	0.000127892	0.695455	0.198932	0.138363	0.000210913	0.00017808	0.695366	0.199957	0.139059	0.000213983	0.000200786	0.695284
	4	0.203492	0.141595	0.000133875	0.000137152	0.695556	0.200682	0.139594	0.000205751	0.000131474	0.695461	0.198655	0.138205	0.000193859	0.000165818	0.695541	0.20444	0.142303	0.000236333	0.000215164	0.695912
	5	0.204907	0.142565	9.24573e-05	0.000176054	0.695487	0.202511	0.140858	0.000177201	0.000147082	0.69542	0.20406	0.141967	0.000220593	0.000178364	0.695555	0.206898	0.143889	0.000238268	0.000186921	0.695309
	6	0.204812	0.142532	0.000127979	0.000179147	0.695648	0.206483	0.143571	0.000167554	0.000163604	0.695184	0.207115	0.144058	0.000214192	0.000175095	0.695391	0.208347	0.144867	0.000202364	0.000207006	0.695165
	7	0.210341	0.146353	0.000142806	0.000146375	0.695531	0.214261	0.14903	0.000189373	0.000144278	0.695424	0.207834	0.144524	0.000233261	0.000199405	0.695231	0.208384	0.145001	0.000263524	0.000189949	0.695686
	8	0.213536	0.148507	0.00012334	0.000108206	0.695209	0.213743	0.148645	0.00016163	0.000161076	0.69531	0.20859	0.14512	0.000181515	0.000165778	0.695562	0.209325	0.145556	0.000230391	0.000216583	0.695211
	9	0.214555	0.14925	0.000117716	0.000146972	0.695372	0.215034	0.149614	0.000121609	0.00014102	0.69564	0.208317	0.144837	0.00022846	0.000178989	0.695115	0.207529	0.144333	0.000244086	0.000173808	0.695333
	10	0.215754	0.150029	0.000104858	0.000119433	0.695115	0.216696	0.150735	0.000170821	0.000130483	0.695476	0.207722	0.144487	0.000203739	0.000173554	0.695424	0.207133	0.144074	0.00024528	0.000182179	0.695411
	11	0.215135	0.149626	0.000112599	0.000145487	0.695245	0.217478	0.151277	0.00020131	0.000171574	0.695473	0.206687	0.143709	0.000233422	0.000165246	0.695144	0.207103	0.144044	0.000233622	0.000191527	0.69537
	12	0.214557	0.149274	0.000119235	0.000135185	0.695477	0.215759	0.15008	0.000161824	0.000152725	0.69546	0.207682	0.1445	0.000186163	0.000198592	0.69562	0.210118	0.146111	0.00021739	0.000189413	0.695227
	13	0.215452	0.149909	0.000114461	0.000140803	0.695535	0.216743	0.150766	0.000163326	0.000142223	0.695475	0.2064	0.143616	0.000246911	0.000172592	0.695657	0.208973	0.145452	0.0002341	0.000206829	0.695884
	14	0.216167	0.150327	0.000151383	0.000151405	0.69517	0.217706	0.151429	0.000191103	0.000137511	0.695438	0.205841	0.143209	0.000245274	0.000151417	0.695573	0.211259	0.146954	0.000238417	0.000220053	0.695463
	15	0.217267	0.15115	0.000121399	0.000142718	0.695436	0.217418	0.151214	0.000162671	0.00012741	0.695374	0.20779	0.144588	0.00019115	0.000165494	0.695684	0.207536	0.14435	0.000263455	0.000195579	0.695393
	16	0.210287	0.146259	0.000134266	0.000120251	0.695259	0.216904	0.150859	0.000138866	0.000163796	0.695386	0.208867	0.145343	0.000212556	0.000186522	0.695713	0.20354	0.141501	0.000241759	0.000173121	0.695048
	17	0.212035	0.147494	0.000124842	0.000154923	0.695354	0.218418	0.151939	0.000147229	0.000142395	0.69551	0.204016	0.141905	0.00020646	0.00019537	0.695404	0.204508	0.142216	0.000247797	0.000191444	0.695255
	18	0.213144	0.148275	0.000149196	0.000122971	0.695398	0.21789	0.15159	0.00017291	0.000133308	0.695594	0.202584	0.140957	0.000208846	0.000202364	0.695636	0.207188	0.144092	0.000247119	0.000180713	0.695314
	Cup	C	H3	C	H3		C	H3	C	H3		C	H3	C	H3		C	H3	C	H3
	Info	tbdgy	tbdgy	tbdgy	tbdgy		tbdgy	tbdgy	tbdgy	tbdgy		tbdgy	tbdgy	tbdgy	tbdgy		tbdgy	tbdgy	tbdgy	tbdgy
	Mean	0.211717	0.147278	0.00012356	0.000140571		0.21264	0.147906	0.000171819	0.00014692		0.205305	0.142813	0.000211579	0.000179091		0.206085	0.143341	0.000236337	0.000195655
	StdErr (%)	0.460621	0.457839	3.08137	3.65685		0.65727	0.658203	2.97511	2.31994		0.37653	0.376942	2.32731	1.95133		0.430113	0.430801	1.55345	2.12193
		isotope ratio (blank corrected)		30/29				not-blank corr
		1		0.695381				0.695637
		2		0.69544				0.69557
		3		0.695459				0.695614
		4		0.695391				0.695544
		average		0.695418	V/V			0.695591
				2.70338e-05				3.0414e-05
			S1	4.68239e-05	urel			5.26786e-05

## Sheet: raw data 1011 rot 2 seq
	raw data: sample and IDMS measurement
	sample: Si28-33Pr11 Part N.2.1
	Sequence 2
	10^11 Ohm, rot. amplifiers
		sample (x, Si28)
		Si28_01		bl_01		30Si/29Si-corr_01	Si28_02		bl_02		30Si/29Si-corr_02	Si28_03		bl_03		30Si/29Si-corr_03	Si28_04		bl_04		30Si/29Si-corr_04
	Cycle	29.073	30.083	29.073	30.083		29.073	30.083	29.073	30.083		29.073	30.083	29.073	30.083		29.073	30.083	29.073	30.083
	1	0.152766	0.00291001	0.00012329	0.000156431	0.0181731	0.154062	0.00280188	0.000156983	0.000142449	0.0172724	0.154302	0.00270508	0.000174084	0.000163842	0.0165039	0.147189	0.00249107	0.000208146	0.000161409	0.015649
	2	0.153229	0.00290605	0.000143406	0.000131925	0.0180922	0.15511	0.00280679	0.000150766	0.000118866	0.0171872	0.153721	0.00263125	0.000161978	0.000139634	0.0160854	0.147615	0.00252016	0.000182379	0.000183384	0.0158011
	3	0.152257	0.00292877	0.000143764	0.000162088	0.0183572	0.155914	0.00281273	0.000147687	0.000177733	0.0171366	0.153788	0.00273123	0.000189986	0.000164468	0.0167293	0.147252	0.00247595	0.000167105	0.000177697	0.0155395
	4	0.153712	0.00286705	0.000136183	0.000135951	0.0177814	0.155764	0.00278487	0.000155877	0.000159	0.0169741	0.154511	0.00267717	0.000146364	0.000145158	0.0163006	0.147288	0.00250983	0.000168287	0.000180566	0.015766
	5	0.154354	0.00288433	0.000122367	0.000118282	0.0178194	0.156376	0.00275226	0.000193514	0.000141654	0.0166989	0.154903	0.00265408	0.000156696	0.00017234	0.0161102	0.147781	0.00250829	0.000207022	0.000189047	0.0157029
	6	0.154318	0.00287693	0.000175279	0.000132918	0.0177755	0.15643	0.00277626	0.000171719	0.000117653	0.0168467	0.155101	0.002655	0.000153182	0.00016863	0.0160955	0.147975	0.00250414	0.000185171	0.000186426	0.0156541
	7	0.155333	0.0029055	0.000137748	0.000111245	0.0178434	0.154672	0.00274332	0.00015635	0.000142427	0.0168252	0.154626	0.00264337	0.00014825	0.000162307	0.0160697	0.145031	0.00244101	0.000210429	0.000189165	0.0155365
	8	0.154868	0.00288895	0.000157332	0.000145468	0.01779	0.155533	0.00279707	0.0001034	0.000162812	0.0170778	0.154887	0.00268238	0.000210862	0.000160095	0.0162947	0.145061	0.00236498	0.000199414	0.000197355	0.0150084
	9	0.154176	0.00286581	0.000122729	0.000160085	0.0177197	0.155583	0.00276586	0.00015314	0.000126735	0.0168716	0.155401	0.00267908	0.000179497	0.000171304	0.0162195	0.145441	0.00240977	0.00018675	0.000197415	0.0152775
	10	0.15534	0.00286544	0.000164329	0.00015515	0.0175845	0.155889	0.0027938	0.000147329	0.000149505	0.0170178	0.155486	0.00260138	0.000175489	0.000180964	0.0157104	0.145438	0.0024378	0.000201599	0.000213393	0.0154709
	11	0.155138	0.00286434	0.000171712	0.000119866	0.0176003	0.155199	0.00272782	0.00011194	0.000126668	0.0166681	0.153521	0.00260519	0.000207173	0.000151783	0.0159365	0.14413	0.0023887	0.000176879	0.000202586	0.0152703
	12	0.154797	0.00289418	0.000146963	0.000123558	0.0178321	0.15657	0.00273766	0.000171749	0.00014358	0.0165848	0.153142	0.00257309	0.00018066	0.000167058	0.0157662	0.14429	0.00242095	0.00019858	0.000200383	0.0154772
	13	0.155687	0.0028237	0.000174743	0.00012909	0.0172769	0.15902	0.00279965	0.000124345	0.00013653	0.0167193	0.153373	0.00256671	0.000172686	0.000189098	0.0157008	0.143634	0.0023824	0.000183057	0.000204362	0.0152793
	14	0.153492	0.00281338	0.000140024	0.000124908	0.0174569	0.158736	0.00281554	0.000158736	0.00012528	0.0168494	0.153749	0.00258608	0.000192217	0.000160678	0.0157884	0.143404	0.00241646	0.000177191	0.000190314	0.0155415
	15	0.152594	0.00280778	0.000166346	0.000128324	0.0175229	0.158766	0.00274837	0.000165525	0.000154641	0.0164227	0.153536	0.00260472	0.000156428	0.000142861	0.0159319	0.142947	0.00238491	0.000174481	0.000176796	0.0153704
	16	0.155871	0.00284902	0.000167551	0.000139102	0.0174191	0.156311	0.00278687	0.000164301	0.000136389	0.0169274	0.150359	0.00261413	0.000158587	0.000144343	0.0163316	0.140792	0.00234639	0.000189401	0.000186714	0.015332
	17	0.155389	0.00284741	0.000151589	0.000160443	0.0174627	0.155309	0.0026979	0.00014242	0.000159853	0.0164634	0.148288	0.00259818	0.000171634	0.000170736	0.0164523	0.1408	0.00234768	0.000221149	0.000204828	0.0153403
	18	0.155432	0.00281721	0.000174472	0.000122692	0.0172634	0.153825	0.0027286	0.000143657	0.000160869	0.0168222	0.146525	0.00256233	0.000189363	0.000149275	0.0164055	0.139872	0.00234654	0.000207277	0.000190988	0.015434
	Cup	C	H3	C	H3		C	H3	C	H3		C	H3	C	H3		C	H3	C	H3
	Info	tbdgy	tbdgy	tbdgy	tbdgy		tbdgy	tbdgy	tbdgy	tbdgy		tbdgy	tbdgy	tbdgy	tbdgy		tbdgy	tbdgy	tbdgy	tbdgy
	Mean	0.154375	0.00286755	0.000151101	0.000136529		0.156059	0.00277096	0.00015108	0.00014348		0.15329	0.00263169	0.000173619	0.000161365		0.144774	0.00242761	0.000191351	0.000190713
	StdErr (%)	0.172804	0.293941	2.9034	2.81231		0.224528	0.293384	3.35497	2.75763		0.376969	0.443506	2.59569	1.99438		0.413258	0.594268	1.95499	1.54064
		isotope ratio (blank corrected)		30/29				not-blank corr
		1		0.0177095				0.0185752
		2		0.0168536				0.0177558
		3		0.0161351				0.0171681
		4		0.0154695				0.0167683
		average		0.0165419	V/V			0.0175668
				0.0290758				0.0223467
			S1	0.0503608	urel			0.0387056
		IDMS blend (bx)
		idms_01		bl_05		30Si/29Si-corr_01	idms_02		bl_06		30Si/29Si-corr_02	idms_03		bl_07		30Si/29Si-corr_03	idms_04		bl_08		30Si/29Si-corr_04
	Cycle	29.073	30.083	29.073	30.083		29.073	30.083	29.073	30.083		29.073	30.083	29.073	30.083		29.073	30.083	29.073	30.083
	1	0.0720431	0.27254	0.000182234	0.000172222	3.79013	0.0700703	0.265346	0.000220675	0.000209158	3.79438	0.0709415	0.268753	0.000218079	0.000210087	3.79656	0.0710388	0.269209	0.00023232	0.000237852	3.79856
	2	0.0723023	0.273794	0.000173416	0.000177492	3.79389	0.0700096	0.265125	0.000226295	0.000177214	3.79452	0.0709822	0.268816	0.000207407	0.000218036	3.79527	0.0705475	0.267378	0.000191517	0.000237226	3.79907
	3	0.0723409	0.274021	0.000203875	0.000200117	3.79501	0.0701885	0.265619	0.000210571	0.000189331	3.79187	0.0710836	0.269264	0.000214641	0.000216905	3.79616	0.070779	0.268239	0.000205447	0.000238	3.79881
	4	0.0721514	0.273126	0.000185232	0.000226289	3.79256	0.0683091	0.258726	0.000198232	0.000213302	3.79529	0.0709354	0.268795	0.000220537	0.00021807	3.79749	0.0692934	0.262429	0.000219572	0.000216651	3.7964
	5	0.0719726	0.272423	0.000182672	0.000158022	3.79223	0.0682894	0.258647	0.000182722	0.000231562	3.79524	0.0706131	0.267808	0.000217262	0.000271143	3.80086	0.0692543	0.26236	0.000242526	0.000224044	3.79754
	6	0.0721061	0.273113	0.000198212	0.000184232	3.79477	0.0686664	0.259927	0.000172539	0.000221225	3.79304	0.0707617	0.268139	0.000189456	0.00024764	3.79754	0.0696937	0.264142	0.00027983	0.00023126	3.79918
	7	0.0704634	0.266712	0.000209059	0.000172161	3.7924	0.0664984	0.251951	0.000163884	0.000213112	3.79676	0.0697949	0.264408	0.000202873	0.000222234	3.79669	0.0715298	0.271157	0.000224751	0.000232948	3.79972
	8	0.0704535	0.266895	0.000160908	0.000194549	3.79554	0.0658774	0.249391	0.000183498	0.000210302	3.79369	0.0701479	0.265876	0.00020838	0.000267761	3.79852	0.0717644	0.271992	0.000240626	0.000213667	3.79893
	9	0.0704435	0.26691	0.000184203	0.000202649	3.79629	0.0660736	0.250307	0.000170834	0.000225667	3.79628	0.0702949	0.266414	0.000198308	0.000207079	3.79823	0.0718926	0.272599	0.000241833	0.000233546	3.80061
	10	0.0714225	0.270496	0.000183788	0.000169244	3.79445	0.0709526	0.268727	0.000184207	0.000207134	3.79485	0.0734919	0.278554	0.000235327	0.000210593	3.79819	0.0716001	0.271366	0.0002322	0.000239876	3.79891
	11	0.0720826	0.272973	0.000172609	0.00019973	3.79407	0.0715024	0.270758	0.00019168	0.000210527	3.79406	0.0735168	0.278599	0.000218049	0.000221728	3.79751	0.0721661	0.273534	0.000221798	0.000248808	3.79916
	12	0.0722399	0.273553	0.000200916	0.000178355	3.79384	0.0718259	0.272028	0.000199153	0.000219161	3.79466	0.0734051	0.278268	0.000229976	0.000214791	3.79878	0.0727754	0.275767	0.000204161	0.000236958	3.79803
	13	0.0738473	0.279756	0.000177373	0.000197691	3.79526	0.0712125	0.269711	0.000226366	0.000200373	3.79482	0.0731015	0.276973	0.000195023	0.00023901	3.79683	0.0736836	0.279549	0.000224365	0.000209848	3.80256
	14	0.0741639	0.280766	0.000155547	0.000215686	3.79266	0.0711503	0.269512	0.0002024	0.000234625	3.79533	0.0724608	0.274695	0.000242091	0.000238686	3.79898	0.073941	0.280252	0.000234726	0.000246487	3.79882
	15	0.074128	0.280857	0.000191514	0.000195512	3.79574	0.0715199	0.27092	0.000178524	0.000213744	3.79541	0.0725922	0.275197	0.000185884	0.000252588	3.79903	0.073972	0.280394	0.000240263	0.000239241	3.79914
	16	0.071585	0.271311	0.000205525	0.000207552	3.79723	0.0716251	0.271286	0.000190301	0.000201664	3.79495	0.0737921	0.279723	0.000208085	0.000228242	3.79858	0.0737597	0.279778	0.00024363	0.000211216	3.80174
	17	0.0722446	0.27372	0.00017522	0.000185163	3.7959	0.0709778	0.268875	0.000205733	0.000206088	3.79559	0.0741738	0.280946	0.000232	0.000215927	3.79551	0.0739405	0.280269	0.000217771	0.000224907	3.79908
	18	0.0728796	0.276217	0.000198369	0.000195984	3.7971	0.0709519	0.268616	0.000190625	0.000201275	3.79332	0.0739399	0.280225	0.000219424	0.00022325	3.79777	0.073867	0.280118	0.000220186	0.000261567	3.80082
	Cup	C	H3	C	H3		C	H3	C	H3		C	H3	C	H3		C	H3	C	H3
	Info	tbdgy	tbdgy	tbdgy	tbdgy		tbdgy	tbdgy	tbdgy	tbdgy		tbdgy	tbdgy	tbdgy	tbdgy		tbdgy	tbdgy	tbdgy	tbdgy
	Mean	0.0721595	0.273288	0.000185593	0.000190703		0.0697612	0.264193	0.000194346	0.000210304		0.0720016	0.272859	0.000213489	0.000229098		0.0719722	0.272807	0.000228751	0.00023245
	StdErr (%)	0.362949	0.363889	1.92452	2.16483		0.672534	0.672413	2.24686	1.56736		0.494321	0.495496	1.72871	2.00311		0.542271	0.548911	2.00255	1.39366
		isotope ratio (blank corrected)		30/29				not-blank corr
		1		3.79439				3.78728
		2		3.79467				3.78711
		3		3.7977				3.78962
		4		3.79928				3.79046
		average		3.79651	V/V			3.78861
				0.00031309				0.000221585
			S1	0.000542288	urel			0.000383797
		material w (WASO04)				material: WASO04 41963/04/72-75 part Mi 2.08
		waso_01		bl_09		30Si/29Si-corr_01	waso_02		bl_10		30Si/29Si-corr_02	waso_03		bl_11		30Si/29Si-corr_03	waso_04		bl_12		30Si/29Si-corr_04
	Cycle	29.073	30.083	29.073	30.083		29.073	30.083	29.073	30.083		29.073	30.083	29.073	30.083		29.073	30.083	29.073	30.083
	1	0.395628	0.276248	0.000255669	0.000256337	0.698053	0.385986	0.269511	0.00028454	0.000259491	0.698036	0.384993	0.268875	0.000319586	0.000304301	0.698198	0.383817	0.26809	0.00033343	0.000292853	0.698296
	2	0.392114	0.273831	0.00023026	0.000205071	0.698145	0.385349	0.269042	0.00027931	0.00030671	0.697972	0.384993	0.268843	0.000268	0.000275779	0.698114	0.384471	0.268489	0.000349779	0.000319382	0.698147
	3	0.386952	0.270213	0.000209127	0.000209745	0.698108	0.382673	0.267235	0.000241099	0.000318649	0.698132	0.381781	0.266555	0.000299352	0.000301532	0.697993	0.380245	0.265523	0.000326615	0.000284636	0.698104
	4	0.389872	0.272192	0.00024553	0.000232404	0.697954	0.380641	0.265832	0.000291198	0.000272121	0.698171	0.379501	0.265014	0.00032818	0.000275769	0.698125	0.375457	0.262161	0.000329981	0.000297457	0.698054
	5	0.396126	0.276586	0.000229423	0.000228722	0.698029	0.384181	0.26824	0.000268392	0.000272415	0.698006	0.382663	0.267234	0.000293225	0.000312613	0.698161	0.376974	0.263212	0.000324354	0.000339719	0.698031
	6	0.396465	0.276852	0.000195127	0.00021435	0.698102	0.390871	0.273025	0.000295843	0.000274359	0.698302	0.389375	0.271866	0.000298525	0.000299715	0.69802	0.383068	0.267506	0.00032745	0.000312656	0.698139
	7	0.394444	0.275409	0.000233052	0.000247389	0.698021	0.394762	0.275617	0.00027969	0.000250156	0.697985	0.390581	0.272684	0.000267817	0.000276399	0.69796	0.389507	0.271928	0.000308387	0.000311462	0.697948
	8	0.397846	0.277733	0.000214526	0.000248674	0.697893	0.394341	0.275323	0.000278335	0.000229171	0.697984	0.390872	0.272935	0.000304839	0.000309902	0.698082	0.389995	0.272313	0.000309358	0.000326077	0.698064
	9	0.399783	0.279213	0.00017515	0.000255101	0.698215	0.394355	0.275308	0.000286881	0.000252398	0.697922	0.391202	0.273142	0.000334317	0.000284348	0.698023	0.390728	0.27284	0.000335331	0.000310595	0.698101
	10	0.398823	0.278483	0.000215882	0.000233651	0.698065	0.397171	0.277381	0.000259674	0.000287834	0.698194	0.395281	0.276233	0.000337011	0.000254491	0.69864	0.388664	0.271345	0.000350406	0.000295265	0.697964
	11	0.398726	0.278336	0.000205211	0.000238474	0.697868	0.399645	0.279106	0.000281701	0.000302393	0.698186	0.39492	0.275796	0.000301474	0.000254343	0.698171	0.387821	0.270785	0.000359343	0.000301517	0.698036
	12	0.397972	0.277894	0.000239916	0.000229721	0.698077	0.401509	0.280353	0.000268311	0.000307871	0.698052	0.395304	0.276034	0.000320871	0.000287003	0.698096	0.388966	0.271626	0.000339049	0.000285827	0.698144
	13	0.39796	0.277906	0.000208762	0.000210874	0.698128	0.400137	0.279459	0.000275091	0.00026891	0.698211	0.396585	0.276957	0.000290814	0.00028004	0.698167	0.381569	0.266414	0.000333792	0.000278842	0.698017
	14	0.398803	0.278422	0.000200724	0.000221065	0.697946	0.399565	0.279106	0.000301143	0.000257689	0.698327	0.397324	0.277437	0.000268038	0.000317384	0.698077	0.38343	0.267708	0.000348858	0.000318516	0.698005
	15	0.397912	0.277826	0.000195633	0.000218856	0.698012	0.401097	0.280053	0.000283547	0.000275154	0.698021	0.395076	0.275932	0.000322165	0.000266521	0.698239	0.389221	0.271738	0.000360322	0.000304411	0.697974
	16	0.396419	0.276867	0.000207841	0.000220366	0.698223	0.393055	0.274426	0.000285585	0.000283614	0.697985	0.393432	0.274711	0.000307166	0.000263009	0.698054	0.387887	0.27082	0.00034608	0.000298551	0.698007
	17	0.395209	0.275896	0.000253374	0.000228556	0.697901	0.389718	0.272101	0.000251445	0.000240381	0.697996	0.391351	0.273266	0.000301129	0.000306136	0.698072	0.387108	0.2703	0.000337687	0.000298162	0.698069
	18	0.38971	0.272174	0.000197091	0.000249391	0.698199	0.38668	0.270052	0.000292976	0.000257164	0.698183	0.389602	0.272042	0.000298361	0.000278222	0.698067	0.382584	0.267154	0.000316543	0.000334087	0.6981
	Cup	C	H3	C	H3		C	H3	C	H3		C	H3	C	H3		C	H3	C	H3
	Info	tbdgy	tbdgy	tbdgy	tbdgy		tbdgy	tbdgy	tbdgy	tbdgy		tbdgy	tbdgy	tbdgy	tbdgy		tbdgy	tbdgy	tbdgy	tbdgy
	Mean	0.395598	0.276227	0.00021735	0.000230486		0.392319	0.273954	0.000278042	0.000273138		0.390269	0.272531	0.000303382	0.000285973		0.385084	0.268886	0.000335376	0.000306112
	StdErr (%)	0.217783	0.21708	2.41785	1.64158		0.410095	0.410576	1.31298	2.11955		0.327585	0.328752	1.6579	1.64094		0.27742	0.276868	1.07828	1.30206
		isotope ratio (blank corrected)		30/29				not-blank corr
		1		0.698052				0.698251
		2		0.698093				0.698294
		3		0.698125				0.698316
		4		0.698067				0.698253
		average		0.698084	V/V			0.698279
				2.30417e-05				2.2763e-05
			S1	3.99093e-05	urel			3.94267e-05

## Sheet: raw data 1011 rot 3 seq
	raw data: sample and IDMS measurement
	sample: Si28-33Pr11 Part N.2.1
	Sequence 3
	10^11 Ohm, rot. amplifiers
		sample (x, Si28)
		Si28_01		bl_01		30Si/29Si-corr_01	Si28_02		bl_02		30Si/29Si-corr_02	Si28_03		bl_03		30Si/29Si-corr_03	Si28_04		bl_04		30Si/29Si-corr_04
	Cycle	29.073	30.083	29.073	30.083		29.073	30.083	29.073	30.083		29.073	30.083	29.073	30.083		29.073	30.083	29.073	30.083
	1	0.136551	0.00211073	0.000234355	0.000237692	0.0137499	0.128877	0.00192039	0.00020255	0.000220936	0.0133188	0.118821	0.00169655	0.000170917	0.00020752	0.0125642	0.106618	0.00154964	0.000149249	0.000155133	0.0128541
	2	0.136505	0.00212485	0.000243742	0.000258949	0.0138581	0.129257	0.00193186	0.000185064	0.000214237	0.0133685	0.118596	0.00168919	0.000182873	0.000198946	0.0125259	0.106521	0.00155515	0.000152028	0.000201161	0.0129176
	3	0.136869	0.00211916	0.000245057	0.000237394	0.0137795	0.128784	0.00192075	0.000180072	0.000215696	0.0133313	0.117641	0.00171163	0.000174533	0.000185996	0.0128188	0.106682	0.00151013	0.0001462	0.000165436	0.0124755
	4	0.136282	0.00211172	0.000214262	0.000213428	0.0137844	0.129032	0.00195383	0.000182949	0.000225008	0.0135624	0.117474	0.00169597	0.000189777	0.000211341	0.0127036	0.105457	0.00151475	0.000133962	0.00018886	0.0126645
	5	0.136346	0.00212823	0.000263653	0.000232837	0.0138991	0.128258	0.00190393	0.000185539	0.000197706	0.0132546	0.11801	0.00171862	0.000171793	0.000185925	0.0128381	0.105233	0.00155748	0.000136493	0.000207856	0.0130982
	6	0.136191	0.0021234	0.000254186	0.00024397	0.0138795	0.127961	0.00190039	0.000202448	0.00018996	0.0132577	0.118055	0.00172313	0.000207669	0.000221031	0.0128714	0.106015	0.00148867	0.000147391	0.00019743	0.0123514
	7	0.136408	0.00212131	0.000245972	0.000249122	0.013842	0.128927	0.00186911	0.000176854	0.00018049	0.0129152	0.118464	0.00169921	0.000163307	0.000214588	0.0126247	0.10584	0.00149585	0.00015402	0.000201677	0.0124397
	8	0.13633	0.00206237	0.000216137	0.000251603	0.0134168	0.129378	0.00191197	0.000228984	0.000212594	0.013202	0.119462	0.0017348	0.000202742	0.000210612	0.0128173	0.105644	0.00150679	0.000145597	0.000197671	0.0125667
	9	0.135075	0.00207377	0.000269417	0.000270298	0.0136263	0.129905	0.00191511	0.000182097	0.000245596	0.0131726	0.118917	0.00167979	0.000177797	0.000211599	0.012413	0.1059	0.0014907	0.000155757	0.000187897	0.0123841
	10	0.133173	0.00207948	0.000241171	0.00024448	0.0138642	0.130348	0.00191625	0.000203268	0.000219269	0.0131365	0.119555	0.00167412	0.000182305	0.000201953	0.0122991	0.104966	0.00146967	0.000152686	0.000154032	0.0122937
	11	0.132554	0.00205834	0.000244549	0.000212357	0.0137693	0.130441	0.00191458	0.000207752	0.000214922	0.0131142	0.12005	0.00168708	0.000157735	0.000197011	0.0123564	0.104638	0.0014845	0.000180962	0.000213307	0.0124743
	12	0.131388	0.0021172	0.000248644	0.000241205	0.0143404	0.130158	0.00194486	0.000198814	0.000210784	0.0133757	0.119437	0.0017343	0.000185503	0.000206329	0.0128159	0.103623	0.00149404	0.000180454	0.000152424	0.0126888
	13	0.131322	0.00205459	0.000273449	0.000280226	0.01387	0.129293	0.00189473	0.000180924	0.000192611	0.0130772	0.119192	0.00170018	0.000174413	0.000224801	0.0125556	0.103796	0.00151449	0.000131253	0.000159998	0.012865
	14	0.133779	0.00206827	0.000209618	0.000226976	0.0137173	0.128163	0.00189553	0.000231415	0.000188929	0.0131988	0.12027	0.00170746	0.000177004	0.000163278	0.0125035	0.104304	0.00146813	0.000125536	0.000195604	0.0123571
	15	0.13448	0.00206739	0.00018729	0.000181297	0.0136391	0.127721	0.0018726	0.00020611	0.000199944	0.0130648	0.120108	0.00168892	0.000240536	0.000193229	0.0123658	0.104956	0.00147049	0.000139858	0.000173015	0.0123027
	16	0.136293	0.00208227	0.000228095	0.000204433	0.0135667	0.124359	0.00182828	0.000216113	0.000176335	0.0130616	0.115684	0.00168434	0.000252221	0.000224452	0.0127997	0.105262	0.00146923	0.000161853	0.000153194	0.0122549
	17	0.135888	0.00208849	0.000244117	0.000236956	0.0136531	0.123429	0.00183578	0.000195674	0.000199352	0.013221	0.115473	0.00163145	0.000207748	0.000246064	0.0123645	0.105679	0.00147748	0.000158231	0.000181769	0.0122847
	18	0.134693	0.0020709	0.000230274	0.00023295	0.0136436	0.123587	0.00184308	0.000187427	0.000213222	0.0132633	0.115458	0.00167743	0.000174086	0.000203767	0.012765	0.105711	0.00147222	0.000154461	0.000173221	0.0122311
	Cup	C	H3	C	H3		C	H3	C	H3		C	H3	C	H3		C	H3	C	H3
	Info	tbdgy	tbdgy	tbdgy	tbdgy		tbdgy	tbdgy	tbdgy	tbdgy		tbdgy	tbdgy	tbdgy	tbdgy		tbdgy	tbdgy	tbdgy	tbdgy
	Mean	0.135007	0.00209236	0.000238555	0.000236454		0.128215	0.0018985	0.000197447	0.000206533		0.11837	0.00169634	0.000188498	0.000206025		0.10538	0.00149941	0.000150333	0.000181094
	StdErr (%)	0.319685	0.298886	2.15641	2.34366		0.401722	0.445154	1.96544	1.97503		0.30573	0.34012	3.15272	2.08118		0.198447	0.465684	2.31511	2.69038
		isotope ratio (blank corrected)		30/29				not-blank corr
		1		0.0137722				0.0154981
		2		0.0132165				0.0148071
		3		0.0126112				0.0143308
		4		0.012528				0.0142286
		average		0.013032	V/V			0.0147162
				0.0222941				0.0196748
			S1	0.0386145	urel			0.0340778
		IDMS blend (bx)
		idms_01		bl_05		30Si/29Si-corr_01	idms_02		bl_06		30Si/29Si-corr_02	idms_03		bl_07		30Si/29Si-corr_03	idms_04		bl_08		30Si/29Si-corr_04
	Cycle	29.073	30.083	29.073	30.083		29.073	30.083	29.073	30.083		29.073	30.083	29.073	30.083		29.073	30.083	29.073	30.083
	1	0.0503274	0.190251	0.000112621	0.000166738	3.7864	0.0491747	0.185959	0.000131249	0.000159452	3.78907	0.0504682	0.191028	0.000155776	0.000195986	3.79205	0.049993	0.189352	0.00015706	0.000174248	3.79462
	2	0.0506587	0.191661	0.000133186	0.000188653	3.78949	0.0494283	0.18696	0.000162903	0.000182618	3.78989	0.0507266	0.192104	0.000152697	0.000189555	3.79395	0.050182	0.189972	0.00015975	0.000160968	3.79266
	3	0.05079	0.192051	7.3945e-05	0.00018776	3.78737	0.049323	0.186555	0.00010958	0.000173804	3.78977	0.0509087	0.192671	0.000123077	0.000178956	3.79152	0.049386	0.186821	0.000118562	0.000195833	3.79
	4	0.0506762	0.191717	0.000139641	0.000153949	3.78929	0.0494832	0.187178	0.00015043	0.000158426	3.79008	0.049262	0.186487	0.000112824	0.000158247	3.79273	0.0489263	0.185221	0.000154685	0.000149168	3.7929
	5	0.0509291	0.192798	0.000148991	0.000189113	3.7917	0.0487939	0.184539	0.000197088	0.000204899	3.78955	0.0493881	0.186897	0.000179075	0.000149088	3.79133	0.0496833	0.188205	0.000136641	0.000202709	3.79518
	6	0.0499588	0.189135	0.000146162	0.000183016	3.79202	0.0487876	0.184618	0.00017973	0.000238297	3.79166	0.0493254	0.186747	0.000118362	0.000207782	3.79311	0.0501206	0.189796	0.000118567	0.000176351	3.79381
	7	0.0493912	0.186712	0.000124558	0.000176348	3.78654	0.0485243	0.183575	0.000133217	0.000162156	3.79074	0.0498432	0.188666	0.000140283	0.000205604	3.79222	0.0490312	0.185615	0.000127287	0.000174994	3.79282
	8	0.0491714	0.185855	0.000156364	0.0001565	3.78603	0.0495899	0.187693	0.000148531	0.000175786	3.79232	0.0500325	0.189368	0.000145731	0.000186025	3.7919	0.0491564	0.186106	0.000145399	0.000168747	3.79316
	9	0.0499933	0.189198	0.000137045	0.000186391	3.79066	0.0500438	0.18936	0.000146204	0.00018012	3.79124	0.050018	0.18941	0.000126677	0.000171229	3.79383	0.0488463	0.184923	0.000126433	0.000185844	3.79302
	10	0.050901	0.192594	9.66007e-05	0.000192703	3.78979	0.0490538	0.185739	0.000143624	0.000188216	3.79394	0.0499772	0.189354	0.000123914	0.000196611	3.79581	0.0504875	0.191161	0.000133656	0.000143072	3.79327
	11	0.0506959	0.191942	0.000108825	0.000193954	3.79226	0.0489411	0.185231	0.0001638	0.000189229	3.7923	0.0499861	0.189233	0.000140472	0.00018509	3.79271	0.050822	0.192553	0.000145194	0.000178387	3.79571
	12	0.0509708	0.192781	0.000125145	0.000181358	3.78827	0.0490537	0.185576	0.000126736	0.000159452	3.79062	0.0494255	0.187015	0.000140024	0.000168683	3.79084	0.0512497	0.194188	0.000181092	0.00017937	3.79594
	13	0.0506997	0.19176	0.000163135	0.000150533	3.78838	0.0483962	0.18308	0.000118242	0.000182428	3.79054	0.0480268	0.181737	0.000153646	0.0002031	3.79136	0.0513196	0.19456	0.000125445	0.00017208	3.79802
	14	0.0509195	0.192732	0.000146907	0.000171972	3.79113	0.0483027	0.1827	0.000125269	0.000183724	3.79001	0.0484548	0.183373	0.000132743	0.000178656	3.79164	0.05102	0.193244	0.000118775	0.000175379	3.79451
	15	0.0507451	0.192043	0.00012002	0.000146557	3.79057	0.0482151	0.182368	0.000137567	0.000168321	3.79001	0.0488535	0.184935	0.000147065	0.000198712	3.79267	0.0508236	0.192521	0.000136879	0.000186688	3.79496
	16	0.048863	0.184941	0.000120995	0.000151688	3.79124	0.049252	0.186319	0.000131598	0.000178207	3.79044	0.0494943	0.187385	0.000139311	0.000182379	3.79306	0.0508373	0.19273	0.000148373	0.000170122	3.79804
	17	0.0490266	0.185545	0.000101441	0.000172253	3.7909	0.0490024	0.185505	0.000140373	0.000176832	3.79315	0.0495963	0.187777	0.000168613	0.00017649	3.79316	0.0504933	0.191346	0.000137477	0.000213553	3.79651
	18	0.0489243	0.185068	0.000137958	0.000168427	3.78906	0.0490377	0.185514	0.000151711	0.000162753	3.79059	0.049653	0.187959	0.0001356	0.000185547	3.7925	0.0503644	0.190729	0.000145605	0.000200999	3.79399
	Cup	C	H3	C	H3		C	H3	C	H3		C	H3	C	H3		C	H3	C	H3
	Info	tbdgy	tbdgy	tbdgy	tbdgy		tbdgy	tbdgy	tbdgy	tbdgy		tbdgy	tbdgy	tbdgy	tbdgy		tbdgy	tbdgy	tbdgy	tbdgy
	Mean	0.0502023	0.189933	0.000127419	0.000173217		0.0490224	0.18547	0.000144325	0.000179151		0.0496356	0.187897	0.000140883	0.000184319		0.0501524	0.189947	0.000139827	0.000178251
	StdErr (%)	0.366055	0.368433	4.22167	2.15524		0.228366	0.229998	3.53234	2.53602		0.346437	0.349279	2.87293	2.04458		0.38238	0.391967	2.81384	2.36023
		isotope ratio (blank corrected)		30/29				not-blank corr
		1		3.78951				3.78334
		2		3.79088				3.78338
		3		3.79258				3.78553
		4		3.7944				3.78739
		average		3.79184	V/V			3.78491
				0.000279173				0.000257067
			S1	0.000483542	urel			0.000445253
		material w (WASO04)				material: WASO04 41963/04/72-75 part Mi 2.08
		waso_01		bl_09		30Si/29Si-corr_01	waso_02		bl_10		30Si/29Si-corr_02	waso_03		bl_11		30Si/29Si-corr_03	waso_04		bl_12		30Si/29Si-corr_04
	Cycle	29.073	30.083	29.073	30.083		29.073	30.083	29.073	30.083		29.073	30.083	29.073	30.083		29.073	30.083	29.073	30.083
	1	0.30033	0.210562	0.000142791	0.000180997	0.70082	0.306484	0.214833	0.000160516	0.000187374	0.700685	0.295473	0.207164	0.000184766	0.000198191	0.700842	0.308701	0.216325	0.00043182	0.000404178	0.700514
	2	0.305912	0.214567	0.000134243	0.000242891	0.701125	0.309897	0.217359	0.000163206	0.000211636	0.701121	0.304367	0.213372	0.000205391	0.00021397	0.700761	0.310024	0.217362	0.000324904	0.000281713	0.70087
	3	0.308834	0.216582	8.31328e-05	0.000169444	0.701016	0.310752	0.217886	0.000140938	0.000194488	0.700887	0.309117	0.216673	0.000198456	0.000293283	0.700672	0.312084	0.218661	0.000244579	0.000242205	0.700407
	4	0.311395	0.218308	0.000150119	0.000217374	0.700791	0.30677	0.215001	0.000146371	0.000220549	0.700582	0.312577	0.219074	0.000169968	0.000178429	0.700598	0.316863	0.222053	0.000215828	0.000221381	0.700548
	5	0.312335	0.21902	0.000117574	0.000163037	0.700965	0.305253	0.214035	0.000161885	0.000213981	0.700899	0.313956	0.220137	0.000164935	0.00021115	0.700907	0.31627	0.221647	0.000223419	0.00024939	0.700578
	6	0.312276	0.218958	0.000115192	0.000175524	0.700896	0.307193	0.215377	0.000186659	0.00020762	0.700838	0.313788	0.219908	0.000194857	0.000199605	0.70055	0.315646	0.221278	0.000185342	0.000240701	0.700793
	7	0.313702	0.219933	0.000150315	0.000153731	0.700821	0.314713	0.220705	0.000190126	0.000192499	0.701023	0.313953	0.220104	0.000128098	0.000204016	0.700807	0.316586	0.2219	0.000234045	0.000214208	0.700679
	8	0.315177	0.220967	0.000147753	0.000154478	0.700819	0.3162	0.221646	0.000157877	0.000205203	0.700702	0.315502	0.221136	0.000176692	0.000220815	0.700638	0.31716	0.222298	0.000228243	0.000211428	0.700666
	9	0.314454	0.220409	0.000123958	0.000165	0.700656	0.316386	0.221969	0.000174399	0.00021145	0.701311	0.315696	0.221462	0.000145385	0.000196932	0.70124	0.317688	0.222667	0.000208157	0.000217108	0.70066
	10	0.319549	0.224083	0.000162071	0.00015399	0.700983	0.315892	0.221488	0.000152416	0.000241139	0.700887	0.313276	0.21958	0.000176217	0.000214446	0.700649	0.310418	0.21754	0.000228019	0.000224759	0.700554
	11	0.316148	0.221644	0.000111109	0.000172064	0.700809	0.315647	0.221339	0.000169453	0.000199758	0.700956	0.313627	0.219892	0.000174244	0.000230612	0.700861	0.310022	0.217378	0.000216092	0.000235268	0.700925
	12	0.306853	0.215195	0.000106805	0.000182694	0.701023	0.315934	0.221474	0.00014868	0.000213363	0.700747	0.311738	0.218471	0.000185304	0.000196821	0.700547	0.311549	0.218455	0.000225537	0.000263969	0.700948
	13	0.305243	0.213991	0.000124333	0.000147076	0.700774	0.316839	0.222245	0.000193655	0.000175754	0.701179	0.302375	0.211961	0.000166126	0.000180285	0.70071	0.316492	0.22188	0.000233125	0.000210454	0.700822
	14	0.306361	0.214823	0.00010227	0.000153083	0.700933	0.317678	0.222837	0.000195143	0.000202642	0.701192	0.312151	0.218743	0.000192773	0.000182228	0.700492	0.317053	0.222176	0.000233214	0.000236224	0.700515
	15	0.30673	0.215141	0.000128412	0.00019237	0.701128	0.318602	0.223396	0.000150897	0.000192747	0.700912	0.314554	0.2205	0.000190659	0.000177781	0.700728	0.317168	0.222247	0.000202877	0.00022035	0.700485
	16	0.31341	0.21973	0.000119128	0.000140251	0.700826	0.308365	0.216264	0.000179965	0.000205382	0.701053	0.319865	0.224234	0.00018591	0.000218932	0.700768	0.315589	0.221162	0.000226682	0.000239019	0.700552
	17	0.318407	0.223289	0.000100753	0.000167989	0.701004	0.308357	0.216215	0.000171954	0.000148949	0.700913	0.320252	0.224527	0.000178341	0.000217468	0.700835	0.315563	0.221208	0.000218347	0.00020282	0.700757
	18	0.319893	0.224316	0.000115123	0.000155076	0.700957	0.313594	0.219838	0.000166064	0.000193426	0.700759	0.320924	0.225	0.000180962	0.000207693	0.70084	0.315736	0.221259	0.000227948	0.000259197	0.700535
	Cup	C	H3	C	H3		C	H3	C	H3		C	H3	C	H3		C	H3	C	H3
	Info	tbdgy	tbdgy	tbdgy	tbdgy		tbdgy	tbdgy	tbdgy	tbdgy		tbdgy	tbdgy	tbdgy	tbdgy		tbdgy	tbdgy	tbdgy	tbdgy
	Mean	0.311501	0.218418	0.000124171	0.000171504		0.312475	0.219106	0.000167234	0.000200998		0.3124	0.218997	0.000177727	0.000207925		0.314478	0.220416	0.000239343	0.000243021
	StdErr (%)	0.41428	0.413587	3.91498	3.51069		0.339692	0.342068	2.35724	2.27432		0.479641	0.480178	2.48104	2.99856		0.228472	0.227181	5.45899	4.3901
		isotope ratio (blank corrected)		30/29				not-blank corr
		1		0.700908				0.701179
		2		0.700925				0.701194
		3		0.700747				0.701014
		4		0.700656				0.700895
		average		0.700809	V/V			0.701071
				9.25438e-05				0.000101608
			S1	0.00016029	urel			0.000175989

## Sheet: raw data 1011 rot 4 seq
	raw data: sample and IDMS measurement
	sample: Si28-33Pr11 Part N.2.1
	Sequence 4
	10^11 Ohm, rot. amplifiers
		sample (x, Si28)
		Si28_01		bl_01		30Si/29Si-corr_01	Si28_02		bl_02		30Si/29Si-corr_02	Si28_03		bl_03		30Si/29Si-corr_03	Si28_04		bl_04		30Si/29Si-corr_04
	Cycle	29.073	30.083	29.073	30.083		29.073	30.083	29.073	30.083		29.073	30.083	29.073	30.083		29.073	30.083	29.073	30.083
	1	0.125559	0.00182625	0.0001592	0.00015997	0.0132895	0.129794	0.00181539	0.000161419	0.000171739	0.0127214	0.130589	0.00176395	0.000153336	0.000176572	0.0121784	0.127616	0.00170482	0.000133099	0.000163416	0.0120786
	2	0.126439	0.00185155	0.000190615	0.000131474	0.0133973	0.129604	0.00182993	0.00013951	0.000153248	0.0128524	0.13167	0.00177712	0.000159613	0.000157905	0.0121785	0.127299	0.00171513	0.000119768	0.000129649	0.0121898
	3	0.126315	0.00181507	0.000154985	0.000175067	0.0131213	0.129204	0.001783	0.000165066	0.000147263	0.0125286	0.132097	0.0017781	0.000160121	0.000146024	0.0121464	0.127328	0.00172585	0.000137014	0.000232009	0.0122713
	4	0.127578	0.00181979	0.000172298	0.000121253	0.0130282	0.128962	0.0018143	0.000138866	0.000189152	0.0127951	0.131926	0.00179344	0.000167523	0.000161821	0.0122786	0.128344	0.0017548	0.000142215	0.000176351	0.0123999
	5	0.127501	0.00182618	0.00017861	0.000168077	0.0130863	0.128902	0.00178795	0.000178707	0.000207353	0.0125965	0.132658	0.00178739	0.000191041	0.000189181	0.0121652	0.128165	0.00178645	0.000108002	0.000188456	0.0126644
	6	0.12817	0.00186579	0.000150412	0.000201592	0.0133274	0.127763	0.00180985	0.00019892	0.000165002	0.0128804	0.132134	0.00176514	0.000155701	0.000196543	0.0120449	0.128086	0.00171905	0.000129232	0.000161862	0.0121454
	7	0.126564	0.00184395	0.000178238	0.000149785	0.0133239	0.128399	0.00174835	0.000147332	0.000160822	0.012337	0.133103	0.00175505	0.000164266	0.000198322	0.0118812	0.127833	0.00170178	0.000171345	0.000187799	0.0120343
	8	0.125912	0.0018196	0.000151438	0.000157496	0.0131994	0.129564	0.00175418	0.000168389	0.00015039	0.012271	0.133085	0.00181992	0.000168271	0.000185409	0.0123709	0.127483	0.00166239	0.000154411	0.00014096	0.011758
	9	0.126105	0.00180764	0.000176883	0.000184039	0.0130842	0.129749	0.00173893	0.000142001	0.000168802	0.0121357	0.13402	0.00177568	0.000146154	0.00019883	0.011954	0.126281	0.00169209	0.000143603	0.000143859	0.0121056
	10	0.127285	0.00182932	0.000155434	0.000125013	0.0131332	0.129372	0.00179763	0.000184615	0.000152682	0.0126255	0.130195	0.00175897	0.000162005	0.000182318	0.012177	0.126543	0.00166811	0.00015471	0.000157311	0.0118907
	11	0.126524	0.00180336	0.000168167	0.000174858	0.0130069	0.130903	0.00178944	0.000164289	0.000154826	0.012415	0.12971	0.00175569	0.000166817	0.000176632	0.0121973	0.126207	0.0016326	0.000178144	0.000183661	0.0116407
	12	0.126428	0.001839	0.000175191	0.000165657	0.0132991	0.130368	0.00181414	0.000163601	0.000177486	0.0126557	0.130133	0.00172664	0.000180238	0.000160555	0.0119341	0.1251	0.00166787	0.000149	0.000167108	0.0120262
	13	0.128293	0.00183208	0.000164972	0.000145106	0.0130514	0.13099	0.00181542	0.000154796	0.000166268	0.0126053	0.12683	0.00167559	0.000173476	0.000143062	0.0118423	0.121031	0.00163857	0.000148438	0.000161302	0.0121885
	14	0.128653	0.0018255	0.000166551	0.000160803	0.0129637	0.131156	0.00182181	0.000160066	0.000171923	0.0126382	0.125347	0.00167636	0.000157161	0.000169714	0.0119887	0.121235	0.00165584	0.000147634	0.00016946	0.0123106
	15	0.128327	0.00178802	0.000145201	0.000151939	0.0127042	0.131754	0.0018077	0.000176742	0.000147214	0.0124735	0.123503	0.00167356	0.000156952	0.000165267	0.0121452	0.12255	0.00164667	0.000123605	0.00016407	0.0121035
	16	0.127015	0.00182669	0.000203271	0.000180691	0.0131405	0.131002	0.00177084	0.000176929	0.000176993	0.0122634	0.125616	0.00174775	0.0001592	0.000184333	0.012532	0.126861	0.00167755	0.000160419	0.000151123	0.0119354
	17	0.127806	0.00178583	0.000156179	0.000163265	0.012739	0.13078	0.00179937	0.000162086	0.00017221	0.0125027	0.127486	0.0017098	0.000134728	0.000197276	0.0120499	0.127535	0.00170477	0.000129614	0.000142574	0.0120859
	18	0.128559	0.00182621	0.000155738	0.000161143	0.0129787	0.131175	0.00177093	0.000181111	0.000160433	0.0122479	0.128697	0.00174628	0.000157316	0.000170224	0.0122202	0.128584	0.00171357	0.000162156	0.000151451	0.0120557
	Cup	C	H3	C	H3		C	H3	C	H3		C	H3	C	H3		C	H3	C	H3
	Info	tbdgy	tbdgy	tbdgy	tbdgy		tbdgy	tbdgy	tbdgy	tbdgy		tbdgy	tbdgy	tbdgy	tbdgy		tbdgy	tbdgy	tbdgy	tbdgy
	Mean	0.127169	0.00182399	0.000166855	0.000159846		0.129969	0.00179273	0.000164691	0.000166322		0.129933	0.00174925	0.000161884	0.000175555		0.126338	0.00169266	0.000144023	0.000165135
	StdErr (%)	0.181828	0.258601	2.14177	3.04088		0.199874	0.35222	2.35392	2.19617		0.555409	0.565046	1.80169	2.34849		0.439641	0.566544	2.99376	3.3386
		isotope ratio (blank corrected)		30/29				not-blank corr
		1		0.0131041				0.0143431
		2		0.0125303				0.0137935
		3		0.0121269				0.0134627
		4		0.0121047				0.0133979
		average		0.0124665	V/V			0.0137493
				0.0187668				0.0157144
			S1	0.032505	urel			0.0272181
		IDMS blend (bx)
		idms_01		bl_05		30Si/29Si-corr_01	idms_02		bl_06		30Si/29Si-corr_02	idms_03		bl_07		30Si/29Si-corr_03	idms_04		bl_08		30Si/29Si-corr_04
	Cycle	29.073	30.083	29.073	30.083		29.073	30.083	29.073	30.083		29.073	30.083	29.073	30.083		29.073	30.083	29.073	30.083
	1	0.0673553	0.255004	0.000126453	0.000178033	3.79118	0.0606609	0.229553	0.000119134	0.000174621	3.78916	0.0602904	0.228073	0.000113296	0.000190174	3.78874	0.0608654	0.230562	0.000144242	0.000179378	3.79428
	2	0.0668916	0.253035	0.000148512	0.00014784	3.78801	0.0608913	0.230539	0.000135693	0.000137135	3.79104	0.0597881	0.226451	0.000167636	0.000199195	3.79345	0.060604	0.229612	0.000155301	0.000171368	3.79496
	3	0.0670516	0.253706	0.000126543	0.00016645	3.78898	0.0611725	0.231416	0.000130193	0.000151219	3.78794	0.06074	0.229981	0.000141601	0.000159534	3.79211	0.0612814	0.231898	0.000159755	0.000175537	3.79031
	4	0.0650182	0.245836	0.000145726	0.00018642	3.78642	0.0602454	0.227937	0.00011382	0.000148817	3.78847	0.0625434	0.236877	0.000121392	0.000142336	3.79302	0.0618941	0.23434	0.000133076	0.000176195	3.79226
	5	0.0652269	0.246606	0.00013724	0.000151638	3.78612	0.0605296	0.228994	9.68779e-05	0.000174233	3.78816	0.0624857	0.236671	0.000146909	0.000163834	3.79323	0.0620562	0.234991	0.000154842	0.000163561	3.79284
	6	0.0656126	0.248183	0.000129647	0.000155202	3.7879	0.0612262	0.231645	0.000125135	0.000151526	3.78835	0.0627155	0.237403	0.000138394	0.000172139	3.791	0.0624156	0.23626	0.000105087	0.000203407	3.79132
	7	0.0669242	0.253109	0.000123661	0.000141996	3.78727	0.0621529	0.235021	0.000128762	0.000166061	3.78619	0.0629798	0.238398	0.000133089	0.000168024	3.79089	0.0626815	0.237378	0.000144153	0.000178108	3.79309
	8	0.0672585	0.254463	0.000151521	0.000159512	3.78858	0.0619953	0.234599	0.000137184	0.000183457	3.789	0.0626697	0.237299	0.000153851	0.000150837	3.79211	0.0627598	0.237674	0.000117797	0.000178137	3.79307
	9	0.067488	0.255227	0.000127549	0.000142594	3.78701	0.06215	0.23514	0.000110415	0.000194786	3.78828	0.0630258	0.238672	0.000118306	0.000164975	3.79247	0.0629319	0.238182	0.000145567	0.000200107	3.79076
	10	0.0670598	0.253839	0.000130189	0.000162698	3.79051	0.0621279	0.235093	0.000146214	0.000135735	3.78888	0.0626327	0.237291	0.000154424	0.000177549	3.79423	0.0624773	0.236544	0.000165434	0.000155974	3.79213
	11	0.0675095	0.255224	0.000141249	0.000196255	3.78577	0.0623324	0.235868	0.00011208	0.000117899	3.78888	0.0628964	0.238121	0.000120439	0.000178234	3.79151	0.0615434	0.232939	0.000151684	0.000191465	3.79109
	12	0.067359	0.25492	0.000109476	0.000198428	3.78971	0.0624734	0.236304	0.000152043	0.000165481	3.78729	0.0626356	0.237001	0.000118467	0.000180795	3.78942	0.0619261	0.234482	0.000116116	0.000182088	3.79258
	13	0.0678624	0.256764	0.000174252	0.000117801	3.78878	0.0620947	0.234845	0.000102893	0.000155679	3.7869	0.0621694	0.235405	0.00013619	0.00017962	3.79217	0.0638137	0.241622	0.000174405	0.000248174	3.79229
	14	0.067216	0.254084	0.000119732	0.000127018	3.78532	0.0617917	0.23388	9.58954e-05	0.000156297	3.78986	0.0618921	0.234221	0.000148636	0.000161302	3.79002	0.0638592	0.241833	0.000167795	0.000221608	3.79289
	15	0.0670126	0.253617	0.000154272	0.000151285	3.78986	0.0626298	0.237045	9.72055e-05	0.000131441	3.78968	0.0622212	0.23573	0.000138185	0.000188897	3.79424	0.0631466	0.239014	0.000178574	0.000193394	3.79105
	16	0.0662118	0.250513	0.000138003	0.000156553	3.78881	0.0627401	0.237629	0.000148081	0.000195474	3.79233	0.0631301	0.239014	0.000132883	0.000184554	3.79162	0.0631659	0.239159	0.000146185	0.000178257	3.79219
	17	0.0661062	0.250187	0.000160091	0.000150754	3.78993	0.0633058	0.239674	0.000108383	0.000176463	3.79073	0.063579	0.240771	0.000127494	0.000119304	3.79249	0.0633551	0.239915	0.000168125	0.000167287	3.79279
	18	0.0665276	0.251612	8.5643e-05	0.000195232	3.78735	0.0639668	0.242148	0.000134328	0.000170754	3.79024	0.0635382	0.240522	0.000162362	0.00016641	3.79101	0.0631865	0.239234	0.000147893	0.000180947	3.79213
	Cup	C	H3	C	H3		C	H3	C	H3		C	H3	C	H3		C	H3	C	H3
	Info	tbdgy	tbdgy	tbdgy	tbdgy		tbdgy	tbdgy	tbdgy	tbdgy		tbdgy	tbdgy	tbdgy	tbdgy		tbdgy	tbdgy	tbdgy	tbdgy
	Mean	0.0667606	0.252552	0.000134986	0.000160317		0.0619159	0.234296	0.000121908	0.000160393		0.0623296	0.235994	0.00013742	0.000169317		0.0624424	0.236424	0.000148668	0.000185833
	StdErr (%)	0.287106	0.290326	3.50925	3.38523		0.373746	0.376936	3.52392	3.1662		0.397509	0.398813	2.73429	2.64261		0.359651	0.358416	3.21895	2.7794
		isotope ratio (blank corrected)		30/29				not-blank corr
		1		3.7882				3.78294
		2		3.78897				3.7841
		3		3.79187				3.78623
		4		3.79234				3.78628
		average		3.79034	V/V			3.78489
				0.000272819				0.000217717
			S1	0.000472536	urel			0.000377096
		material w (WASO04)				material: WASO04 41963/04/72-75 part Mi 2.08
		waso_01		bl_09		30Si/29Si-corr_01	waso_02		bl_10		30Si/29Si-corr_02	waso_03		bl_11		30Si/29Si-corr_03	waso_04		bl_12		30Si/29Si-corr_04
	Cycle	29.073	30.083	29.073	30.083		29.073	30.083	29.073	30.083		29.073	30.083	29.073	30.083		29.073	30.083	29.073	30.083
	1	0.356198	0.248796	0.000167743	0.00015503	0.698272	0.339753	0.237371	0.000137506	0.000220987	0.698412	0.326089	0.227796	0.000164143	0.000226821	0.698323	0.310882	0.217164	0.000161528	0.000224447	0.698271
	2	0.359849	0.251493	0.000159941	0.000184896	0.698682	0.342561	0.239341	0.000184614	0.000196218	0.698439	0.325221	0.227136	0.000193795	0.000193001	0.698159	0.313815	0.219201	0.000206335	0.000233825	0.698237
	3	0.358415	0.250438	0.000163349	0.000178285	0.698535	0.344989	0.240982	0.000175258	0.000170552	0.698279	0.326237	0.227918	0.000167312	0.000204969	0.698382	0.317679	0.221888	0.000162006	0.000217778	0.698202
	4	0.36003	0.251555	0.00016429	0.000194467	0.698503	0.341264	0.238333	0.000147118	0.000190049	0.698138	0.324696	0.22677	0.000149502	0.000222115	0.698159	0.318706	0.222645	0.000205423	0.000201994	0.698326
	5	0.360843	0.252097	0.00014699	0.000156595	0.698433	0.342291	0.23911	0.000176657	0.000188636	0.698314	0.325107	0.227102	0.000151258	0.000231157	0.6983	0.318667	0.222541	0.000163713	0.000191274	0.698086
	6	0.362959	0.253555	0.000150117	0.000189873	0.698379	0.34345	0.239885	0.000156796	0.000211402	0.698214	0.32496	0.22697	0.000144827	0.000183564	0.69821	0.31815	0.222241	0.000156149	0.000193925	0.698277
	7	0.350296	0.244722	0.000172792	0.000175126	0.698406	0.343818	0.240265	0.000168197	0.000196272	0.698572	0.326788	0.228269	0.00020091	0.000200491	0.698276	0.31861	0.222515	0.000166948	0.000222358	0.69813
	8	0.355271	0.248188	0.000149262	0.000191177	0.698382	0.344364	0.240541	0.000162101	0.000182193	0.698266	0.327265	0.228608	0.000168691	0.000199116	0.698296	0.318325	0.222418	0.000171748	0.000216708	0.698449
	9	0.353686	0.247057	0.000122463	0.000184063	0.698316	0.345213	0.241079	0.00014823	0.00017194	0.698105	0.326396	0.227913	0.000243438	0.000214958	0.698026	0.321135	0.224279	0.000128486	0.000196471	0.698134
	10	0.355482	0.248246	0.000154531	0.000192278	0.698132	0.348343	0.24343	0.000164527	0.000186334	0.698584	0.328057	0.229141	0.000181599	0.000164747	0.698237	0.317688	0.221862	0.000180808	0.000217212	0.698101
	11	0.355861	0.248671	0.000134026	0.000176231	0.698582	0.344743	0.240772	0.000115298	0.000216968	0.698168	0.328651	0.229554	0.000193197	0.000198598	0.69823	0.316893	0.221339	0.0001719	0.000191669	0.698199
	12	0.357695	0.249853	0.000142993	0.000175635	0.698304	0.342425	0.239259	0.000179204	0.000179247	0.698478	0.330143	0.230594	0.00018967	0.000161591	0.698224	0.317586	0.221845	0.000155819	0.000179225	0.698271
	13	0.364751	0.254821	0.000132757	0.000194615	0.698417	0.343416	0.239823	0.000186721	0.000200475	0.698102	0.329649	0.230325	0.000148191	0.000211159	0.698453	0.31807	0.222143	0.000167852	0.000208562	0.698145
	14	0.364786	0.254771	0.000143655	0.00017073	0.698211	0.34437	0.240599	0.000179813	0.000178092	0.698425	0.329891	0.230397	0.000123984	0.000216195	0.69816	0.316734	0.221217	0.00016273	0.000186297	0.698168
	15	0.36135	0.25253	0.000164409	0.000182098	0.698651	0.347281	0.24264	0.000175108	0.000175089	0.698447	0.327564	0.228762	0.000143814	0.000176908	0.698128	0.313628	0.219035	0.000155613	0.000205882	0.698124
	16	0.355556	0.248324	0.000156123	0.000147686	0.698208	0.350213	0.244693	0.000254579	0.000284433	0.69846	0.324993	0.22701	0.000200615	0.000201148	0.69826	0.314985	0.21992	0.000168332	0.000212762	0.697927
	17	0.353481	0.246857	0.00011946	0.00015471	0.698155	0.348877	0.243776	0.000351443	0.00032795	0.698508	0.325116	0.22696	0.000179028	0.00020626	0.697844	0.316752	0.221248	0.000202024	0.000170914	0.698225
	18	0.356302	0.248986	0.00013386	0.00017674	0.698603	0.350728	0.245035	0.000194555	0.000295491	0.698411	0.327425	0.228643	0.000154791	0.000194333	0.698061	0.316642	0.221181	0.000179464	0.000180061	0.698254
	Cup	C	H3	C	H3		C	H3	C	H3		C	H3	C	H3		C	H3	C	H3
	Info	tbdgy	tbdgy	tbdgy	tbdgy		tbdgy	tbdgy	tbdgy	tbdgy		tbdgy	tbdgy	tbdgy	tbdgy		tbdgy	tbdgy	tbdgy	tbdgy
	Mean	0.357934	0.250053	0.00014882	0.00017668		0.344894	0.240941	0.000180985	0.000209574		0.326903	0.228326	0.000172154	0.000200396		0.316941	0.221371	0.000170382	0.000202854
	StdErr (%)	0.263453	0.264704	2.47727	1.95588		0.209539	0.21142	6.67015	5.1592		0.129833	0.130975	3.9105	2.29238		0.174959	0.175113	2.67975	2.05532
		isotope ratio (blank corrected)		30/29				not-blank corr
		1		0.698398				0.698602
		2		0.698351				0.698593
		3		0.698207				0.698453
		4		0.698196				0.698461
		average		0.698288	V/V			0.698527
				7.30146e-05				5.82847e-05
			S1	0.000126465	urel			0.000100952

## Sheet: raw data 1011 rot 5 seq
	raw data: sample and IDMS measurement
	sample: Si28-33Pr11 Part N.2.1
	Sequence 5
	10^11 Ohm, rot. amplifiers
		sample (x, Si28)
		Si28_01		bl_01		30Si/29Si-corr_01	Si28_02		bl_02		30Si/29Si-corr_02	Si28_03		bl_03		30Si/29Si-corr_03	Si28_04		bl_04		30Si/29Si-corr_04
	Cycle	29.073	30.083	29.073	30.083		29.073	30.083	29.073	30.083		29.073	30.083	29.073	30.083		29.073	30.083	29.073	30.083
	1	0.120003	0.00156265	0.000145214	0.000202941	0.0115223	0.113487	0.00144632	0.000101112	0.0001542	0.011279	0.103685	0.00135001	8.32437e-05	0.000146775	0.0115417	0.0985852	0.00125085	8.60002e-05	0.000145514	0.0112898
	2	0.121074	0.00153869	0.000141896	0.000202762	0.0112222	0.113475	0.00143786	0.000138473	0.000184421	0.0112056	0.10386	0.00131939	7.76248e-05	0.000116642	0.0112271	0.0982399	0.00125755	7.65257e-05	0.000146318	0.0113978
	3	0.121116	0.00155726	0.000153464	0.000168614	0.0113718	0.112779	0.00147203	0.000112948	0.000156224	0.0115781	0.104152	0.0013538	9.63047e-05	0.000146716	0.0115264	0.0990791	0.00126932	9.21572e-05	0.000115916	0.0114201
	4	0.120006	0.001586	0.000138242	0.000195673	0.0117169	0.11307	0.00148528	0.000120821	0.000173426	0.0116656	0.104442	0.00133127	0.000109139	0.000146014	0.0112784	0.100226	0.00127277	9.63242e-05	0.000143134	0.0113238
	5	0.119821	0.00158797	0.000132584	0.000174292	0.0117515	0.113266	0.00141913	0.000133088	0.000188417	0.0110608	0.103695	0.00129863	9.63356e-05	0.000130288	0.0110446	0.100661	0.00128632	0.00013003	0.000148435	0.0114095
	6	0.119323	0.00156115	0.000122639	0.000210634	0.0115756	0.113359	0.00145552	0.000108315	0.000143652	0.011373	0.104369	0.00133289	0.000108067	0.000159325	0.0113019	0.0996497	0.00123806	9.36743e-05	0.000171141	0.0110407
	7	0.118859	0.00155171	0.000171906	0.00017083	0.0115413	0.113862	0.00142828	9.3265e-05	0.000148576	0.0110833	0.103332	0.00129168	0.000103784	0.000162091	0.0110161	0.0992394	0.00121486	6.96302e-05	0.000119834	0.0108524
	8	0.11922	0.00155796	0.000138598	0.000188436	0.0115588	0.113563	0.00141952	0.000109314	0.000170605	0.0110352	0.103319	0.00133863	8.59678e-05	0.000146399	0.0114723	0.0993711	0.00123563	0.000107913	0.000136692	0.0110473
	9	0.119768	0.00159655	0.000128762	0.000161474	0.0118284	0.113321	0.00147177	0.000101481	0.00015835	0.0115204	0.103214	0.00128633	0.000100898	0.000146249	0.0109768	0.0999764	0.00127077	0.000103967	0.000110449	0.011332
	10	0.117368	0.0015212	0.000163208	0.000158579	0.0114278	0.113579	0.00146286	0.000146035	0.000161793	0.0114157	0.102692	0.00133038	0.000158504	0.000143857	0.0114621	0.0986666	0.00125552	7.60774e-05	0.000134675	0.011328
	11	0.117474	0.00150347	0.000144258	0.000163016	0.0112664	0.113716	0.00144409	0.000175986	0.000182724	0.0112367	0.101872	0.00131123	8.53956e-05	0.000154874	0.0113662	0.0986033	0.00123703	7.44933e-05	0.000162903	0.0111475
	12	0.118138	0.00156572	0.000140402	0.000187193	0.0117305	0.113137	0.0014762	0.000134916	0.000155986	0.0115784	0.101806	0.00129985	0.000135698	0.000181405	0.0112617	0.0986638	0.00124352	6.74099e-05	0.000142	0.0112065
	13	0.118433	0.00156675	0.00017171	0.000163984	0.01171	0.112403	0.00141497	0.000125763	0.000174339	0.0111088	0.101646	0.0012831	0.000107055	0.000163978	0.0111145	0.10017	0.00125927	6.6252e-05	0.000145902	0.0111953
	14	0.119321	0.00156923	0.000151641	0.000196439	0.0116435	0.111964	0.00143404	0.000157237	0.00016141	0.0113229	0.101904	0.00127426	0.000137664	0.000132997	0.0109995	0.100431	0.00124737	5.92552e-05	0.000171259	0.0110475
	15	0.120117	0.00156198	0.000166648	0.000203478	0.0115058	0.11115	0.00145564	9.53928e-05	0.000161734	0.0116004	0.10325	0.00136365	0.000108424	0.000182061	0.0117227	0.100665	0.00126794	9.14114e-05	0.000131913	0.0112263
	16	0.120542	0.00158168	0.00012994	0.000192322	0.0116289	0.108959	0.00140636	0.000116323	0.00018585	0.0113812	0.106332	0.00130439	8.74402e-05	0.000190457	0.0108246	0.102168	0.00127289	7.43713e-05	0.00013182	0.0111096
	17	0.119678	0.00151516	0.000128409	0.000172594	0.0111565	0.10822	0.00138348	9.73288e-05	0.000187613	0.0112474	0.105633	0.00131668	0.000128727	0.000155844	0.0110128	0.101677	0.00128817	8.98608e-05	0.000112392	0.0113136
	18	0.119105	0.00153425	0.000128468	0.000155436	0.0113706	0.108473	0.0013723	0.000100097	0.000168423	0.0111179	0.104279	0.00134284	0.000115387	0.000175781	0.0114071	0.102761	0.0012629	6.55665e-05	0.000127904	0.0109481
	Cup	C	H3	C	H3		C	H3	C	H3		C	H3	C	H3		C	H3	C	H3
	Info	tbdgy	tbdgy	tbdgy	tbdgy		tbdgy	tbdgy	tbdgy	tbdgy		tbdgy	tbdgy	tbdgy	tbdgy		tbdgy	tbdgy	tbdgy	tbdgy
	Mean	0.119409	0.00155663	0.000144333	0.000181594		0.112321	0.00143809	0.000120439	0.000167652		0.103527	0.00131828	0.000106981	0.000154542		0.0999352	0.00125726	8.44955e-05	0.000138789
	StdErr (%)	0.211276	0.387694	2.55351	2.3411		0.390883	0.517731	4.55476	1.97029		0.291103	0.470055	4.76787	2.94141		0.306793	0.3562	5.03601	3.07548
		isotope ratio (blank corrected)		30/29				not-blank corr
		1		0.0115294				0.0130361
		2		0.0113228				0.0128034
		3		0.0112531				0.0127337
		4		0.011202				0.0125808
		average		0.0113268	V/V			0.0127885
				0.00634862				0.00740759
			S1	0.0109961	urel			0.0128303
		IDMS blend (bx)
		idms_01		bl_05		30Si/29Si-corr_01	idms_02		bl_06		30Si/29Si-corr_02	idms_03		bl_07		30Si/29Si-corr_03	idms_04		bl_08		30Si/29Si-corr_04
	Cycle	29.073	30.083	29.073	30.083		29.073	30.083	29.073	30.083		29.073	30.083	29.073	30.083		29.073	30.083	29.073	30.083
	1	0.0512175	0.19478	8.29032e-05	0.000156002	3.80644	0.0467992	0.178071	4.954e-05	0.000142194	3.80762	0.0528718	0.201212	9.29832e-05	0.000147998	3.80821	0.0471853	0.179419	0.000101412	0.000139855	3.8046
	2	0.0514295	0.195637	7.63279e-05	0.000135159	3.80741	0.046724	0.17778	7.59306e-05	0.000131832	3.80753	0.0533195	0.202692	8.37178e-05	0.000139958	3.80399	0.0473242	0.179988	3.06682e-05	0.000120322	3.80545
	3	0.051668	0.196428	7.99742e-05	0.000201109	3.80515	0.0462091	0.175547	6.66654e-05	0.000173787	3.80163	0.053704	0.204305	4.28616e-05	0.000155501	3.80679	0.0470506	0.178932	5.89112e-05	0.000112968	3.80514
	4	0.0512411	0.194865	8.08196e-05	0.000137402	3.80635	0.0470517	0.178915	7.77014e-05	0.000121785	3.80512	0.0541871	0.206125	6.00409e-05	0.000132612	3.80644	0.0470493	0.179061	4.66306e-05	0.000144204	3.808
	5	0.0498671	0.189553	7.95096e-05	0.000149064	3.8047	0.0459504	0.17471	6.37374e-05	0.000132475	3.8048	0.0543168	0.206583	5.91774e-05	0.000170866	3.80578	0.0466988	0.177723	5.00248e-05	0.000145235	3.80792
	6	0.0499053	0.189738	0.000104848	0.000118761	3.80549	0.0450683	0.171315	9.16656e-05	0.00015845	3.80395	0.054057	0.205672	8.40094e-05	0.000163622	3.80722	0.0467274	0.177814	5.84209e-05	0.000167911	3.80753
	7	0.0509164	0.193716	6.33393e-05	0.000162289	3.80807	0.045461	0.172859	5.0462e-05	0.000135021	3.80506	0.0535084	0.203825	8.44933e-05	0.000144751	3.81173	0.048377	0.184066	6.48409e-05	0.000147501	3.80693
	8	0.0508661	0.193356	0.000164673	0.000171884	3.80475	0.0455035	0.173036	6.12691e-05	0.000144077	3.8054	0.0544024	0.207155	9.58306e-05	0.000159607	3.81031	0.0497728	0.189504	6.58421e-05	0.00016956	3.80944
	9	0.0503146	0.191295	7.68263e-05	0.000155892	3.80549	0.0452262	0.171743	5.50852e-05	0.000153343	3.80012	0.0544139	0.206975	8.01056e-05	0.000116147	3.80619	0.0512044	0.194864	9.81755e-05	0.000138295	3.80761
	10	0.0497196	0.18912	8.81037e-05	0.000162613	3.80728	0.0469502	0.178419	6.57987e-05	9.14571e-05	3.80279	0.0530213	0.201747	9.93793e-05	0.000126499	3.80757	0.0525658	0.199888	4.30412e-05	0.000120501	3.80458
	11	0.050292	0.191158	0.00010523	0.000142543	3.80448	0.0482486	0.183352	3.2893e-05	0.000160626	3.80269	0.0524801	0.199734	3.27001e-05	0.000134152	3.80847	0.0492412	0.187303	5.91204e-05	0.000149384	3.80587
	12	0.0513101	0.195067	6.81387e-05	0.000123189	3.80516	0.0484333	0.184238	0.000118552	0.000128051	3.8065	0.0518688	0.197308	8.67664e-05	0.000140137	3.80658	0.0464177	0.1765	6.32448e-05	0.000100849	3.80462
	13	0.0513029	0.195264	8.76379e-05	0.000127419	3.80954	0.0484366	0.184014	5.17387e-05	0.000121314	3.8016	0.0505152	0.192039	4.5928e-05	0.000187211	3.80427	0.0528457	0.201163	6.24702e-05	0.000143173	3.80856
	14	0.051756	0.196859	9.74337e-05	0.000140171	3.80702	0.048238	0.183453	3.87278e-05	0.000118811	3.80562	0.0509319	0.193925	7.57618e-05	0.000191511	3.81019	0.0523133	0.199079	9.49539e-05	0.000166821	3.80746
	15	0.0513638	0.195321	4.50615e-05	0.00016376	3.80614	0.0477061	0.181472	6.35588e-05	0.00015256	3.80653	0.0518389	0.197154	5.50686e-05	0.000157143	3.8058	0.0524808	0.199671	5.4729e-05	0.000176746	3.8066
	16	0.0492499	0.187435	7.72091e-05	0.000150542	3.80938	0.0470369	0.178909	8.12641e-05	9.43118e-05	3.80619	0.0515651	0.196217	0.000130727	0.000251464	3.80785	0.0538803	0.205057	7.2291e-05	0.000151954	3.80769
	17	0.0489526	0.186087	6.69614e-05	0.000139901	3.80497	0.0468585	0.178234	7.93794e-05	0.000155047	3.80627	0.051315	0.195239	0.000101985	0.000220376	3.80733	0.0544214	0.207308	9.70859e-05	0.0001666	3.81119
	18	0.0488392	0.185769	9.81173e-05	0.000156938	3.80731	0.0461366	0.175339	9.28666e-05	0.000107044	3.80309	0.0515503	0.195977	9.02945e-05	0.000170965	3.80428	0.0545954	0.207897	5.35333e-05	0.000170217	3.80984
	Cup	C	H3	C	H3		C	H3	C	H3		C	H3	C	H3		C	H3	C	H3
	Info	tbdgy	tbdgy	tbdgy	tbdgy		tbdgy	tbdgy	tbdgy	tbdgy		tbdgy	tbdgy	tbdgy	tbdgy		tbdgy	tbdgy	tbdgy	tbdgy
	Mean	0.0505673	0.192303	8.57285e-05	0.000149702		0.0467799	0.177856	6.7602e-05	0.000134566		0.0527704	0.200771	7.78795e-05	0.000161695		0.0500084	0.190291	6.52997e-05	0.000146228
	StdErr (%)	0.442179	0.442769	6.81295	3.08975		0.559176	0.56219	7.29999	4.01004		0.57832	0.580714	7.42106	4.95073		1.41651	1.42361	7.31892	3.50131
		isotope ratio (blank corrected)		30/29				not-blank corr
		1		3.8064				3.8029
		2		3.80458				3.80197
		3		3.80717				3.80462
		4		3.80717				3.80518
		average		3.80633	V/V			3.80367
				0.000160115				0.000195655
			S1	0.000277327	urel			0.000338884
		material w (WASO04)				material: WASO04 41963/04/72-75 part Mi 2.08
		waso_01		bl_09		30Si/29Si-corr_01	waso_02		bl_10		30Si/29Si-corr_02	waso_03		bl_11		30Si/29Si-corr_03	waso_04		bl_12		30Si/29Si-corr_04
	Cycle	29.073	30.083	29.073	30.083		29.073	30.083	29.073	30.083		29.073	30.083	29.073	30.083		29.073	30.083	29.073	30.083
	1	0.221018	0.154708	0.000136711	0.000200161	0.699512	0.299243	0.209762	0.00012076	0.000192065	0.700634	0.305528	0.214105	0.000122804	0.000190271	0.700438	0.291778	0.20458	0.000129389	0.00021293	0.700836
	2	0.215685	0.150962	8.47945e-05	0.000133795	0.69944	0.300604	0.210664	0.00011807	0.000173667	0.700462	0.307045	0.215199	0.000155832	0.000174344	0.700541	0.289175	0.202633	0.000163673	0.000200396	0.700413
	3	0.215513	0.150924	9.51357e-05	0.000171701	0.699826	0.302181	0.211887	0.000128681	0.000143355	0.700854	0.300886	0.210904	0.000140797	0.000214862	0.700609	0.287558	0.201592	0.000176107	0.000167139	0.700731
	4	0.250153	0.175171	0.000102322	0.000165715	0.699841	0.308159	0.216002	0.000136268	0.000185119	0.700613	0.29865	0.209329	0.000117592	0.000181385	0.700578	0.286564	0.200808	0.000150971	0.000200664	0.700426
	5	0.254309	0.178168	0.000111463	0.000188186	0.700191	0.303224	0.212557	0.000145678	0.000177668	0.700651	0.303728	0.212842	0.000270774	0.000284031	0.700432	0.28978	0.203144	0.000124173	0.000205729	0.700715
	6	0.258297	0.180966	8.69884e-05	0.000229005	0.700211	0.301269	0.211169	0.000100448	0.000184324	0.700593	0.307206	0.215317	0.000192563	0.000256811	0.700557	0.291651	0.204375	0.000217872	0.00022287	0.700439
	7	0.255679	0.179173	0.000155673	0.000190095	0.700372	0.303663	0.212877	6.04611e-05	0.00016673	0.700693	0.309593	0.216969	0.000123663	0.000225268	0.700493	0.28809	0.201884	0.000159079	0.000229374	0.70045
	8	0.256354	0.179609	0.000119392	0.000159965	0.700228	0.307792	0.215646	0.000113792	0.000197428	0.700291	0.310088	0.217398	0.000138771	0.000170298	0.700761	0.288126	0.201909	0.000127068	0.000195656	0.70045
	9	0.25841	0.181009	5.27524e-05	0.0001533	0.700074	0.312054	0.218615	7.55677e-05	0.000185412	0.700242	0.309166	0.21666	0.000135178	0.000225238	0.70046	0.288746	0.20241	0.000103509	0.000196134	0.700684
	10	0.272196	0.190776	8.65877e-05	0.000141507	0.700499	0.303082	0.212504	0.000109522	0.000166908	0.700809	0.309915	0.217173	0.000138795	0.000187145	0.700426	0.295449	0.207103	0.000150402	0.000147963	0.700667
	11	0.270991	0.189853	9.54944e-05	0.000170867	0.700209	0.303101	0.212423	6.98903e-05	0.000192124	0.700494	0.309786	0.217056	0.000160375	0.000198637	0.700336	0.296962	0.208162	0.000153391	0.000200158	0.700666
	12	0.27269	0.191101	9.64807e-05	0.000172088	0.700422	0.302481	0.211983	0.000127545	0.000195488	0.700477	0.3091	0.216684	0.000131711	0.000202953	0.700688	0.294393	0.20635	0.000152853	0.000162554	0.700624
	13	0.272431	0.190963	8.64524e-05	0.000177819	0.70058	0.310254	0.217502	9.54758e-05	0.000153489	0.700715	0.303774	0.212884	0.000102317	0.000189837	0.700466	0.293822	0.206001	0.000140102	0.000170123	0.700801
	14	0.27224	0.190719	0.000101995	0.000172224	0.700174	0.311309	0.218235	0.000110066	0.000195722	0.700696	0.30353	0.212694	0.000123577	0.000159503	0.700403	0.294121	0.206103	0.000105831	0.000194891	0.700434
	15	0.273569	0.191685	0.000100149	0.000195608	0.700306	0.312752	0.219158	0.000130849	0.000183971	0.700415	0.300307	0.21048	0.000110506	0.000204298	0.700548	0.29576	0.207282	0.000109672	0.000183611	0.700538
	16	0.277798	0.194662	7.43369e-05	0.000159188	0.700362	0.313417	0.219628	0.000103426	0.000150321	0.700427	0.29911	0.209677	0.000118716	0.000178877	0.700665	0.293576	0.205757	0.000160758	0.000185612	0.700554
	17	0.281802	0.197468	9.60691e-05	0.000166421	0.700369	0.314872	0.220698	0.000108402	0.000192676	0.700586	0.301283	0.211117	0.000127727	0.00017798	0.700391	0.29613	0.207515	0.000110193	0.000184267	0.70045
	18	0.283083	0.198329	8.92667e-05	0.000148756	0.70024	0.313106	0.219481	0.000121389	0.000189597	0.700654	0.301938	0.21164	0.000133411	0.00018088	0.700604	0.29601	0.207481	0.000143176	0.000184746	0.70062
	Cup	C	H3	C	H3		C	H3	C	H3		C	H3	C	H3		C	H3	C	H3
	Info	tbdgy	tbdgy	tbdgy	tbdgy		tbdgy	tbdgy	tbdgy	tbdgy		tbdgy	tbdgy	tbdgy	tbdgy		tbdgy	tbdgy	tbdgy	tbdgy
	Mean	0.259012	0.181458	9.8448e-05	0.000172022		0.306809	0.215044	0.000109794	0.000179226		0.305035	0.213785	0.000141395	0.000200146		0.292094	0.204727	0.000143234	0.000191379
	StdErr (%)	1.95619	1.96327	5.4356	3.13221		0.400939	0.399184	4.93271	2.19479		0.313572	0.313038	6.37497	3.72412		0.27878	0.279458	4.71483	2.56033
		isotope ratio (blank corrected)		30/29				not-blank corr
		1		0.700159				0.700578
		2		0.700572				0.700905
		3		0.700522				0.700853
		4		0.700583				0.700895
		average		0.700459	V/V			0.700808
				0.000144196				0.000110487
			S1	0.000249754	urel			0.00019137

## Sheet: raw data 1011 rot 6 seq
	raw data: sample and IDMS measurement
	sample: Si28-33Pr11 Part N.2.1
	Sequence 6
	10^11 Ohm, rot. amplifiers
		sample (x, Si28)
		Si28_01		bl_01		30Si/29Si-corr_01	Si28_02		bl_02		30Si/29Si-corr_02	Si28_03		bl_03		30Si/29Si-corr_03	Si28_04		bl_04		30Si/29Si-corr_04
	Cycle	29.073	30.083	29.073	30.083		29.073	30.083	29.073	30.083		29.073	30.083	29.073	30.083		29.073	30.083	29.073	30.083
	1	0.121301	0.00176265	0.000542081	0.000490733	0.0105233	0.121335	0.00167155	0.000495499	0.000431032	0.0100616	0.119277	0.0016124	0.000486006	0.000411271	0.0100354	0.116974	0.0015499	0.000384869	0.000397921	0.0100281
	2	0.122188	0.00176202	0.000562559	0.000485164	0.0104415	0.121633	0.0016824	0.000506829	0.000477575	0.0101264	0.12085	0.00162688	0.000457548	0.000415559	0.0100245	0.118023	0.00155961	0.00038741	0.000376631	0.0100213
	3	0.122356	0.00172326	0.000544921	0.000500947	0.0101088	0.121594	0.00169491	0.000525154	0.000438893	0.0102331	0.120476	0.00161651	0.000483614	0.000401266	0.00996942	0.118428	0.00152207	0.000407616	0.000399142	0.00966871
	4	0.121655	0.00175027	0.000549548	0.000506601	0.0103904	0.120868	0.00165237	0.000519504	0.000462133	0.00994129	0.118821	0.00164854	0.00046883	0.000398087	0.0103795	0.115844	0.00154852	0.00035814	0.000368683	0.0101143
	5	0.122856	0.00179404	0.000533497	0.000517116	0.0106462	0.12032	0.00167819	0.000504882	0.000450971	0.0102022	0.117084	0.00163387	0.000478747	0.000418967	0.0104082	0.116141	0.00152199	0.00039804	0.000363617	0.00985916
	6	0.122238	0.00176062	0.000567387	0.000484658	0.0104256	0.119399	0.00166675	0.000526622	0.000457627	0.0101851	0.117966	0.00164342	0.00046219	0.000428274	0.0104113	0.11704	0.00153248	0.000358795	0.000370744	0.00987312
	7	0.119893	0.00176628	0.00053417	0.000481068	0.0106779	0.116578	0.00166282	0.000532466	0.000459837	0.0103989	0.119582	0.00161465	0.000470713	0.000454888	0.0100287	0.116817	0.00153676	0.000441424	0.000377636	0.00992876
	8	0.121097	0.00174729	0.000546452	0.000468423	0.0104137	0.117155	0.00161648	0.000493234	0.000485067	0.00995017	0.119576	0.0016177	0.000479814	0.00041295	0.0100548	0.117256	0.0015457	0.000423606	0.000389203	0.00996794
	9	0.122101	0.00174834	0.000556909	0.000499123	0.0103363	0.117534	0.00167784	0.000527282	0.000432576	0.0104422	0.119939	0.0016029	0.000438935	0.0004432	0.00990029	0.117803	0.00156694	0.000431999	0.000401309	0.0101024
	10	0.123261	0.00173405	0.000566595	0.000466314	0.0101221	0.11751	0.00171043	0.000535707	0.00043392	0.010723	0.119756	0.00160936	0.000472823	0.000428392	0.00996963	0.117197	0.00154644	0.000399396	0.00037404	0.00997932
	11	0.123822	0.00177421	0.000544203	0.000500947	0.0104019	0.11899	0.00167283	0.000504049	0.000452174	0.0102717	0.120398	0.0016278	0.000462689	0.000437832	0.0100701	0.117573	0.00152871	0.000397513	0.000350964	0.00979599
	12	0.123194	0.00177239	0.000581632	0.000505116	0.0104404	0.120287	0.00166223	0.000513944	0.000481327	0.0100719	0.120944	0.00162107	0.000462092	0.000391738	0.0099685	0.1173	0.00155151	0.000430064	0.000349803	0.0100139
	13	0.122964	0.00175175	0.000563635	0.000486337	0.0102913	0.120828	0.00162036	0.000503691	0.000453798	0.00967856	0.121106	0.00163351	0.000465793	0.000416759	0.0100583	0.117412	0.0015591	0.00045825	0.000384762	0.0100692
	14	0.123606	0.00172802	0.000578526	0.000484835	0.0100448	0.121089	0.00165396	0.000533769	0.00046231	0.0099363	0.121496	0.00164238	0.00045013	0.000407865	0.0100991	0.117881	0.00153891	0.000392561	0.000397307	0.00985717
	15	0.123213	0.00172652	0.000607414	0.000500445	0.0100647	0.12183	0.00162528	0.000532727	0.000482278	0.00963921	0.121922	0.00164957	0.000488633	0.000430865	0.010123	0.118026	0.00153528	0.0004193	0.00042823	0.00981416
	16	0.122815	0.00176625	0.000585304	0.000502113	0.0104224	0.121543	0.00170117	0.000535117	0.000452484	0.0102891	0.122239	0.00163703	0.000437728	0.000400605	0.00999358	0.117332	0.00154414	0.000425609	0.000378084	0.0099482
	17	0.123096	0.00175417	0.000551194	0.000468453	0.0103	0.121597	0.00165747	0.000510523	0.000438763	0.00992353	0.121749	0.00162333	0.00048382	0.000444276	0.00992098	0.118001	0.00154839	0.000413298	0.000370373	0.00992767
	18	0.123438	0.00175785	0.000555024	0.00050845	0.0103012	0.121735	0.00165756	0.000517239	0.000453948	0.00991298	0.120534	0.00162847	0.000453072	0.000418809	0.0100643	0.11813	0.00156406	0.000440039	0.0003791	0.01005
	Cup	C	H3	C	H3		C	H3	C	H3		C	H3	C	H3		C	H3	C	H3
	Info	tbdgy	tbdgy	tbdgy	tbdgy		tbdgy	tbdgy	tbdgy	tbdgy		tbdgy	tbdgy	tbdgy	tbdgy		tbdgy	tbdgy	tbdgy	tbdgy
	Mean	0.122505	0.00175444	0.000559503	0.000492047		0.120101	0.0016647	0.00051768	0.000455928		0.120206	0.00162719	0.000466843	0.000420089		0.117399	0.00154447	0.000409329	0.000380975
	StdErr (%)	0.195078	0.246303	0.816441	0.7111		0.350996	0.365755	0.642211	0.890824		0.267826	0.197964	0.776455	0.984256		0.136777	0.203466	1.57986	1.18572
		isotope ratio (blank corrected)		30/29				not-blank corr
		1		0.0103529				0.0143214
		2		0.0101104				0.0138608
		3		0.0100822				0.0135366
		4		0.00994552				0.0131558
		average		0.0101228	V/V			0.0137186
				0.00837184				0.0180211
			S1	0.0145005	urel			0.0312135
		IDMS blend (bx)
		idms_01		bl_05		30Si/29Si-corr_01	idms_02		bl_06		30Si/29Si-corr_02	idms_03		bl_07		30Si/29Si-corr_03	idms_04		bl_08		30Si/29Si-corr_04
	Cycle	29.073	30.083	29.073	30.083		29.073	30.083	29.073	30.083		29.073	30.083	29.073	30.083		29.073	30.083	29.073	30.083
	1	0.0595457	0.225317	0.000423489	0.000356267	3.8026	0.0573304	0.216962	0.000327823	0.000324512	3.80238	0.0558656	0.211564	0.0003385	0.000345656	3.80469	0.0538083	0.203437	0.000321913	0.000280815	3.79683
	2	0.059784	0.226112	0.000410278	0.00035859	3.80073	0.0574633	0.217336	0.000369368	0.000321594	3.80009	0.0563712	0.213489	0.0003356	0.000366588	3.80472	0.0543675	0.205812	0.00033357	0.00030246	3.80149
	3	0.060188	0.227784	0.000405405	0.000344447	3.803	0.0579073	0.219033	0.000362314	0.000362713	3.80026	0.0567202	0.214722	0.000362261	0.000306206	3.80303	0.0544545	0.206349	0.000321823	0.00030383	3.80531
	4	0.0610044	0.230852	0.000371453	0.000335968	3.8024	0.0572635	0.216763	0.000340203	0.000348825	3.80336	0.0566982	0.21466	0.000326035	0.000312511	3.80342	0.0546505	0.206625	0.000277957	0.000293876	3.79666
	5	0.0612644	0.231662	0.000435443	0.000368862	3.79946	0.0577394	0.218411	0.000369918	0.000333924	3.80054	0.0567992	0.21506	0.000337915	0.000321669	3.80371	0.054666	0.206945	0.000306748	0.000297145	3.80146
	6	0.0614953	0.232639	0.000379135	0.000398931	3.80109	0.0576572	0.218162	0.000358961	0.000370205	3.80164	0.0568805	0.215196	0.000347324	0.000309301	3.80064	0.0546427	0.206898	0.000319044	0.000317788	3.80222
	7	0.0608084	0.229811	0.000390802	0.00036096	3.7975	0.0575624	0.217689	0.000356924	0.000341512	3.79967	0.0561912	0.212649	0.000308388	0.000326813	3.80195	0.0540166	0.204379	0.000284954	0.000325769	3.79965
	8	0.0604057	0.228486	0.000352783	0.000357044	3.80091	0.0579092	0.219141	0.000366465	0.000352391	3.802	0.0559567	0.211691	0.000347643	0.000315007	3.80075	0.0538333	0.203841	0.000310131	0.000332195	3.80262
	9	0.0608418	0.230132	0.000392982	0.000394496	3.80071	0.0578938	0.219071	0.000348943	0.000360192	3.80181	0.0558917	0.211662	0.000315073	0.000323316	3.80468	0.0543188	0.205452	0.00030112	0.000313484	3.79826
	10	0.0611346	0.231359	0.000400324	0.000368207	3.80259	0.0556721	0.210717	0.000369458	0.000373879	3.80348	0.0558583	0.211406	0.000326335	0.000332585	3.80235	0.0546969	0.207208	0.000307178	0.00031568	3.80414
	11	0.0610108	0.229678	0.000399069	0.000357935	3.78264	0.055692	0.210677	0.00038512	0.000384211	3.80139	0.0554951	0.210165	0.000340891	0.000336605	3.80489	0.0547939	0.20736	0.000312139	0.000301091	3.80015
	12	0.0609775	0.229473	0.000374589	0.000384018	3.78133	0.0558108	0.211097	0.000376871	0.000326447	3.80081	0.0552905	0.209195	0.000357987	0.000296232	3.80141	0.0547405	0.207318	0.000300304	0.000310976	3.80312
	13	0.0608332	0.229923	0.000365587	0.000369039	3.7978	0.0560895	0.211907	0.000367328	0.00034055	3.79634	0.055114	0.208577	0.000340535	0.000332506	3.80238	0.0547284	0.207014	0.000308028	0.000317022	3.79837
	14	0.061354	0.232103	0.000358411	0.000377255	3.80111	0.0565961	0.214036	0.000348212	0.000342141	3.80001	0.0552612	0.209185	0.000385227	0.000347967	3.80325	0.0551946	0.209065	0.000292248	0.000280684	3.80348
	15	0.0616424	0.23341	0.000372614	0.000374575	3.80455	0.057087	0.216087	0.000354078	0.000340403	3.80327	0.0557129	0.210792	0.000371114	0.000343638	3.80125	0.0549882	0.208087	0.000300763	0.000271136	3.79996
	16	0.0609554	0.230634	0.000397046	0.00038786	3.80187	0.0583241	0.220614	0.000374829	0.000327404	3.8002	0.0561331	0.2127	0.00037079	0.000333956	3.80682	0.054645	0.207049	0.000315579	0.0002801	3.80486
	17	0.0611404	0.2312	0.000391509	0.000375785	3.79962	0.0585035	0.221264	0.000371059	0.000360402	3.79966	0.0570634	0.215966	0.000341459	0.00032499	3.80196	0.0544241	0.206012	0.000315579	0.000302097	3.80123
	18	0.0609457	0.230782	0.00038715	0.000376143	3.80494	0.0584232	0.221017	0.000380513	0.000368561	3.80066	0.0572712	0.216688	0.00037459	0.00034092	3.80077	0.0543014	0.205635	0.000299471	0.00028264	3.80288
	Cup	C	H3	C	H3		C	H3	C	H3		C	H3	C	H3		C	H3	C	H3
	Info	tbdgy	tbdgy	tbdgy	tbdgy		tbdgy	tbdgy	tbdgy	tbdgy		tbdgy	tbdgy	tbdgy	tbdgy		tbdgy	tbdgy	tbdgy	tbdgy
	Mean	0.0608518	0.230075	0.000389337	0.000369243		0.0572736	0.216666	0.000362688	0.000348881		0.056143	0.21252	0.000345981	0.000328693		0.0545151	0.20636	0.000307142	0.000301599
	StdErr (%)	0.214156	0.215722	1.31872	1.05204		0.382908	0.384366	0.95344	1.26362		0.27349	0.273142	1.42872	1.23817		0.158955	0.164183	1.05279	1.36055
		isotope ratio (blank corrected)		30/29				not-blank corr
		1		3.79916				3.78091
		2		3.80098				3.783
		3		3.80293				3.78534
		4		3.80126				3.78538
		average		3.80108	V/V			3.78366
				0.000202949				0.000283106
			S1	0.000351519	urel			0.000490354
		material w (WASO04)				material: WASO04 41963/04/72-75 part Mi 2.08
		waso_01		bl_09		30Si/29Si-corr_01	waso_02		bl_10		30Si/29Si-corr_02	waso_03		bl_11		30Si/29Si-corr_03	waso_04		bl_12		30Si/29Si-corr_04
	Cycle	29.073	30.083	29.073	30.083		29.073	30.083	29.073	30.083		29.073	30.083	29.073	30.083		29.073	30.083	29.073	30.083
	1	0.336193	0.23621	0.000292168	0.000264687	0.702342	0.328625	0.230974	0.000318243	0.000293996	0.702558	0.327208	0.229961	0.000415287	0.000358812	0.702525	0.314863	0.221328	0.000334796	0.000307198	0.702688
	2	0.337568	0.237254	0.000304302	0.000319678	0.702577	0.330068	0.231905	0.000473973	0.000489628	0.702306	0.330988	0.232578	0.000353325	0.000316621	0.702408	0.317721	0.223372	0.000348933	0.000313451	0.702798
	3	0.339137	0.238314	0.00030762	0.000291989	0.702449	0.330835	0.232464	0.000610384	0.000615038	0.702368	0.333807	0.234597	0.000340115	0.000325851	0.702525	0.318445	0.223796	0.000358617	0.000315446	0.702532
	4	0.340637	0.239445	0.000320512	0.000280742	0.702677	0.329406	0.231506	0.000330797	0.000369959	0.702509	0.332436	0.23357	0.000343835	0.000321545	0.702332	0.320589	0.225271	0.000309044	0.000298318	0.702434
	5	0.341538	0.240023	0.00027737	0.00028165	0.702518	0.330168	0.232044	0.000348811	0.000325345	0.702517	0.333862	0.23475	0.000330645	0.000295307	0.702868	0.321928	0.226246	0.000332864	0.000320462	0.70254
	6	0.339442	0.238522	0.000282938	0.000328889	0.702434	0.332341	0.233567	0.000317786	0.000328584	0.702503	0.336242	0.23626	0.000321028	0.000324195	0.702381	0.319953	0.224948	0.000327445	0.000332536	0.702822
	7	0.343396	0.24128	0.000302062	0.000297608	0.702375	0.331793	0.233227	0.000325521	0.000309127	0.70264	0.332238	0.233524	0.00031062	0.000328906	0.702612	0.319945	0.224901	0.000330416	0.00034699	0.702693
	8	0.34392	0.241644	0.000301797	0.000320293	0.702363	0.334686	0.235263	0.000319809	0.000329869	0.702651	0.330874	0.232521	0.000353496	0.000332971	0.702477	0.319129	0.224267	0.000332242	0.000334019	0.702502
	9	0.344617	0.242137	0.000312074	0.000292706	0.702374	0.336118	0.236182	0.000359328	0.000325745	0.70239	0.327366	0.230061	0.000316185	0.000334077	0.702492	0.31641	0.22241	0.000331005	0.000369825	0.70267
	10	0.342078	0.240469	0.000305827	0.000275673	0.702709	0.330139	0.232046	0.000280196	0.000339968	0.702582	0.316511	0.222493	0.000326695	0.000329395	0.702673	0.30865	0.217003	0.000323199	0.00029898	0.702816
	11	0.338422	0.237781	0.000315002	0.000290083	0.70236	0.329066	0.231204	0.000328166	0.000286493	0.702316	0.314409	0.220994	0.000351323	0.00034726	0.702605	0.311175	0.21863	0.000361845	0.000295318	0.702343
	12	0.337704	0.237308	0.00034513	0.000334119	0.702452	0.328434	0.230737	0.000341944	0.000276638	0.702245	0.316947	0.222786	0.000343163	0.000357472	0.702632	0.31336	0.220302	0.000361038	0.000290703	0.702782
	13	0.333114	0.23412	0.000291959	0.000299146	0.702561	0.326879	0.229727	0.000323532	0.000310002	0.702494	0.329746	0.231712	0.000336243	0.000313564	0.702428	0.317711	0.223269	0.000321698	0.000300703	0.702496
	14	0.331469	0.232819	0.000260191	0.000319347	0.702123	0.33016	0.232109	0.000306352	0.000325757	0.70273	0.33598	0.236184	0.000347408	0.000318011	0.702707	0.320352	0.225136	0.000337628	0.000282299	0.702535
	15	0.333455	0.234334	0.000303422	0.000313075	0.702484	0.335326	0.2356	0.000327939	0.000327082	0.702313	0.338635	0.237981	0.00032737	0.000311385	0.702502	0.324247	0.227903	0.000327802	0.000285538	0.702627
	16	0.337695	0.237337	0.000293934	0.000267123	0.702558	0.335123	0.235553	0.000296663	0.000323832	0.702598	0.339137	0.238355	0.00032979	0.000337126	0.702565	0.330635	0.232336	0.000344404	0.000336798	0.70246
	17	0.343061	0.241055	0.00030536	0.000303585	0.702405	0.338325	0.237766	0.000342336	0.0002975	0.702489	0.341231	0.239834	0.000334325	0.000326426	0.702589	0.331025	0.23258	0.000349822	0.000316714	0.70237
	18	0.344204	0.24185	0.000301767	0.000296352	0.702382	0.339271	0.238389	0.000383977	0.000304375	0.702367	0.342767	0.240958	0.000329172	0.000323108	0.702719	0.332499	0.23372	0.000338455	0.000327653	0.702686
	Cup	C	H3	C	H3		C	H3	C	H3		C	H3	C	H3		C	H3	C	H3
	Info	tbdgy	tbdgy	tbdgy	tbdgy		tbdgy	tbdgy	tbdgy	tbdgy		tbdgy	tbdgy	tbdgy	tbdgy		tbdgy	tbdgy	tbdgy	tbdgy
	Mean	0.339314	0.238439	0.000301302	0.000298708		0.332042	0.233348	0.000351987	0.000343274		0.331132	0.232729	0.000339446	0.000327891		0.319924	0.224856	0.000337292	0.000315164
	StdErr (%)	0.277576	0.278099	1.40838	1.62261		0.254762	0.254559	5.12756	5.62138		0.585727	0.585395	1.57193	1.13071		0.478352	0.476618	1.00712	1.72877
		isotope ratio (blank corrected)		30/29				not-blank corr
		1		0.702452				0.702709
		2		0.702476				0.702766
		3		0.702558				0.702828
		4		0.7026				0.702843
		average		0.702522	V/V			0.702786
				4.89969e-05				4.36822e-05
			S1	8.48651e-05	urel			7.56598e-05

## Sheet: MM N21 1011 no rot
Molar Mass calculation (overview)
		molar masses of Si isotopes		M(29Si)	28.9765	g/mol			blue: measured quantities
		(AME 2020)		M(30Si)	29.9738	g/mol
				M(28Si)	27.9769	g/mol
10^11 Ohm, no rot. amplifiers		Meng Wang et al 2021 Chinese Phys. C 45 030003
sample	run	Ry,2true	Ry,3true	Rw,2true	Rw,2meas	u(Rw,2meas)	K2	u(K2)	mx1	myx1	Rxmeas	Rx	u(Rx)	Rbxmeas	Rbx	u(Rbx)	M(Si28)	u(M)	urel(M)	wy	wimp	x(28Si)	u(x(28Si))	x(29Si)	u(x(29Si))	x(30Si)	u(x(30Si))			M_av(Si28)	M_av + u	M_av - u
SIS code	sequence	mol/mol	mol/mol	mol/mol	V/V	V/V	1	1	g	g	V/V	mol/mol	mol/mol	V/V	mol/mol	mol/mol	g/mol	g/mol		g/g	g/g	mol/mol	mol/mol	mol/mol		mol/mol				g/mol	g/mol	g/mol
Si28-33Pr11 N.2.1	1	269.039	1.58552	0.662302	0.704496	7.54125e-05	0.940107	0.00188	0.062475	5.61102e-06	0.00952058	0.00895037	0.000170424	3.81496	3.58647	0.00162381	27.9769	4.96e-08	1.77289e-09	0.994549	2.39497e-05	0.999977	4.9e-08	2.29114e-05	4.88e-08	2.05066e-07	3.68e-09	1		27.9769	27.9769	27.9769
Si28-33Pr11 N.2.1	2	269.039	1.58552	0.662302	0.705758	0.000113517	0.938426	0.00188	0.062475	5.61102e-06	0.00947584	0.00889237	0.000204254	3.82455	3.58906	0.00154218	27.9769	4.99e-08	1.78361e-09	0.994549	2.39304e-05	0.999977	4.92e-08	2.28943e-05	4.88e-08	2.03585e-07	4.41e-09	1		27.9769	27.9769	27.9769
Si28-33Pr11 N.2.1	3	269.039	1.58552	0.662302	0.70237	0.000143916	0.942953	0.0019	0.062475	5.61102e-06	0.00979835	0.00923938	0.00034148	3.80227	3.58536	0.00122659	27.9769	5.15e-08	1.8408e-09	0.994549	2.39663e-05	0.999977	4.95e-08	2.29205e-05	4.86e-08	2.11771e-07	7.41e-09	1		27.9769	27.9769	27.9769
Si28-33Pr11 N.2.1	4	269.039	1.58552	0.662302	0.704924	0.000179199	0.939537	0.00189	0.062475	5.61102e-06	0.00949709	0.00892287	8.72858e-05	3.82088	3.58986	0.00221066	27.9769	5.04e-08	1.80148e-09	0.994549	2.39259e-05	0.999977	5.02e-08	2.28893e-05	5.01e-08	2.04238e-07	1.89e-09	1		27.9769	27.9769	27.9769
Si28-33Pr11 N.2.1	5	269.039	1.58552	0.662302	0.702763	5.06744e-05	0.942425	0.00189	0.062475	5.61102e-06	0.010232	0.00964288	0.000261971	3.81288	3.59336	0.000750487	27.9769	4.97e-08	1.77646e-09	0.994549	2.39247e-05	0.999977	4.86e-08	2.28713e-05	4.8e-08	2.20545e-07	5.66e-09	1		27.9769	27.9769	27.9769
Si28-33Pr11 N.2.1	6	269.039	1.58552	0.662302	0.702757	5.7933e-05	0.942434	0.00189	0.062475	5.61102e-06	0.0122508	0.0115456	0.000401917	3.78788	3.56982	0.00223492	27.977	5.41e-08	1.93373e-09	0.994549	2.41448e-05	0.999977	5.14e-08	2.30368e-05	5.02e-08	2.65973e-07	8.75e-09	1		27.9769	27.9769	27.9769
average					0.704062	0.000121627	0.94069	0.00188801				0.00912957	0.000229617		3.58882	0.00154725	27.9769	5.02248e-08	1.79522e-09			0.999977	4.93029e-08	2.29206e-05	4.88648e-08	2.1853e-07	4.97004e-09
						0.00017275		0.00200705					0.0251509			0.000431129
											average	0.00912957			3.58882
											N	5			5
											sdv (Stabw)	0.000318843			0.00313065
											sdv/(N)^1/2	0.000142591			0.00140007
											rel.sdv/(N)^1/2	0.0156186			0.00039012
											u(M)incl sdv	0.000270289	0.0296059		0.00208666	0.000581434
													0.0296059			0.000581434	#DIV/0!
																	0.00127622

## Sheet: raw data 1011 no rot 1 seq
	raw data: sample and IDMS measurement
	sample: Si28-33Pr11 Part N.2.1
	Sequence 1	no rotation
	10^11 Ohm, no rot. amplifiers
		sample (x, Si28)
		Si28_01		bl_01		30Si/29Si-corr_01	Si28_02		bl_02		30Si/29Si-corr_02	Si28_03		bl_03		30Si/29Si-corr_03	Si28_04		bl_04		30Si/29Si-corr_04
	Cycle	29.074	30.084	29.074	30.084		29.074	30.084	29.074	30.084		29.074	30.084	29.074	30.084		29.074	30.084	29.074	30.084
	1	0.102959	0.00129193	0.000280492	0.000274517	0.00980484	0.0920735	0.00110864	0.000219302	0.000236894	0.009297	0.0895783	0.00107999	0.000228039	0.000224193	0.00939844	0.0816044	0.000997295	0.000221255	0.000244108	0.00951787
	2	0.104026	0.00128954	0.000295735	0.000287081	0.00968102	0.0939825	0.00113265	0.000275033	0.000266905	0.00936383	0.0901934	0.00107737	0.000231835	0.000230356	0.009305	0.0823361	0.000964559	0.000186043	0.000204036	0.00903441
	3	0.104435	0.00129306	0.000332497	0.000309918	0.00967675	0.0941322	0.00117987	0.000263526	0.000229273	0.00985192	0.0911239	0.00111639	0.000273399	0.000242682	0.0096392	0.0826136	0.000988835	0.000204486	0.000244793	0.00929861
	4	0.10324	0.00128555	0.000361967	0.000346868	0.00971613	0.093979	0.00110167	0.000265708	0.000240229	0.0090336	0.090938	0.00107686	0.000324685	0.00023113	0.00922302	0.0824706	0.000969623	0.000226158	0.000228508	0.0090812
	5	0.103163	0.00127387	0.000303147	0.000288302	0.00960989	0.0946101	0.00116197	0.00035035	0.000305491	0.00961229	0.0920583	0.00112602	0.000377469	0.000290854	0.00964591	0.0824295	0.000962444	0.000191962	0.000233063	0.00899842
	6	0.103088	0.00130864	0.000279207	0.000298008	0.00995507	0.0946638	0.00116707	0.000271835	0.000253239	0.00966078	0.0919367	0.00110454	0.000324954	0.000314554	0.00942441	0.0835319	0.0010034	0.000255721	0.000280341	0.00937096
	7	0.104171	0.00129386	0.000274515	0.00026761	0.00970913	0.0939653	0.00118961	0.000229884	0.000251244	0.00997341	0.0899288	0.00109658	0.000235243	0.000264713	0.00954675	0.0846722	0.000997563	0.000215277	0.000193616	0.00917529
	8	0.104359	0.00129452	0.000265698	0.0002624	0.00969787	0.0944063	0.00114863	0.00023942	0.000244069	0.00949137	0.089493	0.00108062	0.000224273	0.000215202	0.00941443	0.0848616	0.00103849	0.000226456	0.000213801	0.00963832
	9	0.104463	0.00130092	0.000291461	0.000276869	0.00974963	0.0950958	0.00116549	0.000287944	0.000263094	0.00960013	0.0893539	0.00108202	0.000249562	0.00020633	0.00944484	0.0846398	0.00104916	0.000208252	0.000229252	0.00978997
	10	0.10152	0.00132091	0.000267073	0.000265675	0.0102305	0.094018	0.00111955	0.000242618	0.000258211	0.00922048	0.0882344	0.00108997	0.000217427	0.000215053	0.00965544	0.0817622	0.00098252	0.000237098	0.000217016	0.00931827
	11	0.101917	0.00129017	0.000267551	0.000265198	0.00988809	0.0940085	0.00114041	0.000259538	0.000241956	0.00944396	0.0887338	0.00108967	0.000242298	0.000229106	0.00959757	0.0821021	0.000971082	0.000185744	0.000226603	0.00913989
	12	0.101806	0.00126944	0.000290205	0.000284908	0.00969467	0.0946653	0.00115491	0.000243934	0.000254996	0.0095319	0.0893871	0.00107963	0.000235333	0.000202877	0.00941459	0.0832497	0.000983891	0.000219073	0.000224548	0.00916782
	13	0.101903	0.00131156	0.000284198	0.000283687	0.0101	0.0939756	0.00115152	0.000245309	0.00021016	0.00956582	0.0881311	0.00107737	0.000259636	0.000229939	0.00952339	0.0829892	0.000986154	0.000182815	0.00019058	0.00922403
	14	0.103115	0.00127796	0.000273678	0.000263918	0.00965412	0.0950253	0.00116269	0.00026175	0.00024535	0.00957773	0.0887334	0.00108404	0.000236379	0.000236787	0.00953398	0.0832732	0.00101734	0.000233063	0.000208234	0.00956799
	15	0.103465	0.00127411	0.000251366	0.000285563	0.00958414	0.0951739	0.00119602	0.000245458	0.000286287	0.00991388	0.0889699	0.00106182	0.000234167	0.000233631	0.00925805	0.0838471	0.00102372	0.000291364	0.000213652	0.00957857
	16	0.101447	0.00128156	0.000290205	0.000275648	0.00984888	0.0926721	0.00114815	0.00025891	0.000281345	0.00966432	0.0890801	0.0010953	0.000215693	0.000232619	0.00962354	0.0830237	0.00096864	0.000226397	0.000207073	0.00900866
	17	0.101988	0.00125037	0.000305059	0.000293512	0.00948988	0.0925136	0.0011441	0.000245189	0.000236239	0.00963703	0.0900281	0.00107573	0.000253209	0.000269775	0.00930389	0.0836489	0.000991367	0.000263942	0.000223983	0.00921358
	18	0.102119	0.00127596	0.000298305	0.000305154	0.00972898	0.0927661	0.00113832	0.00025329	0.000285751	0.00954826	0.0912447	0.0010964	0.000314792	0.00025986	0.0094067	0.0842885	0.000995418	0.000205323	0.000225382	0.00919166
	Cup	C	H3	C	H3		C	H3	C	H3		C	H3	C	H3		C	H3	C	H3
	Info	tbdgy	tbdgy	tbdgy	tbdgy		tbdgy	tbdgy	tbdgy	tbdgy		tbdgy	tbdgy	tbdgy	tbdgy		tbdgy	tbdgy	tbdgy	tbdgy
	Mean	0.102955	0.001288	0.000289575	0.000285269		0.0939848	0.00115063	0.000258833	0.000255041		0.0898415	0.00108835	0.000259911	0.000240537		0.0831858	0.000993972	0.000221135	0.000222699
	StdErr (%)	0.241782	0.307571	2.10273	1.72374		0.229797	0.520533	2.57319	2.16806		0.313172	0.338504	4.12454	2.86518		0.283601	0.589825	3.05595	2.2012
		isotope ratio (blank corrected)		30/29				not-blank corr
		1		0.00976776				0.0125103
		2		0.00955487				0.0122427
		3		0.0094644				0.0121141
		4		0.00929531				0.0119488
		average		0.00952058	V/V			0.012204
				0.0103349				0.00971056
			S1	0.0179006	urel			0.0168192
		IDMS blend (bx)
		idms_01		bl_05		30Si/29Si-corr_01	idms_02		bl_06		30Si/29Si-corr_02	idms_03		bl_07		30Si/29Si-corr_03	idms_04		bl_08		30Si/29Si-corr_04
	Cycle	29.074	30.084	29.074	30.084		29.074	30.084	29.074	30.084		29.074	30.084	29.074	30.084		29.074	30.084	29.074	30.084
	1	0.0465179	0.176772	0.000181088	0.00021021	3.81143	0.0462597	0.176066	0.000175758	0.000202867	3.81542	0.044992	0.171265	0.000141298	0.000199447	3.81692	0.0447837	0.170429	0.000190332	0.000212508	3.81527
	2	0.0472363	0.179572	0.000168653	0.000189727	3.81273	0.0469305	0.178648	0.000170019	0.000203105	3.81592	0.045214	0.172038	0.000145543	0.000194654	3.81528	0.0451873	0.171954	0.000164775	0.000219207	3.81495
	3	0.047988	0.182295	0.000198006	0.00024138	3.80975	0.0471373	0.179409	0.000161739	0.000244874	3.81531	0.044743	0.170386	0.000179259	0.000229635	3.81851	0.0455286	0.173413	0.000170783	0.000227334	3.8184
	4	0.0480251	0.182525	0.00018593	0.000230037	3.8116	0.0467835	0.177965	0.000172201	0.000194323	3.81329	0.04445	0.169202	0.000178781	0.000201769	3.81705	0.0446769	0.17018	0.000164984	0.000190686	3.81884
	5	0.0482281	0.183194	0.000172479	0.000220689	3.80942	0.0471288	0.179575	0.000156897	0.000202897	3.81954	0.0451005	0.171675	0.000178392	0.000190188	3.81682	0.0449921	0.171271	0.000174101	0.0001981	3.81632
	6	0.048459	0.18427	0.000168593	0.000208007	3.81348	0.0476112	0.181177	0.000191511	0.000198789	3.81447	0.0455878	0.173448	0.000150504	0.000192659	3.81492	0.0452172	0.172063	0.000167346	0.000199886	3.81483
	7	0.0479608	0.182369	0.000174063	0.000205595	3.81346	0.0474846	0.180591	0.000177163	0.000237134	3.81229	0.04518	0.171934	0.000161893	0.000154548	3.81583	0.0453698	0.17275	0.000168362	0.000276606	3.81715
	8	0.0480842	0.182841	0.000174033	0.000196039	3.81348	0.0477531	0.181513	0.000146973	0.000222784	3.81016	0.0456467	0.173642	0.000199884	0.000176434	3.81424	0.0457562	0.174371	0.000140086	0.000190418	3.82036
	9	0.0478512	0.18181	0.000202669	0.0002167	3.8105	0.0475548	0.180944	0.000163054	0.000250948	3.81409	0.0456614	0.17388	0.000175702	0.000203228	3.81823	0.0459421	0.174737	0.000148724	0.000196969	3.81284
	10	0.0484466	0.184115	0.000207302	0.000230127	3.81124	0.0473146	0.18001	0.00017256	0.000209923	3.81371	0.0452838	0.172353	0.000183982	0.000183847	3.81633	0.0454851	0.173107	0.000148425	0.000179668	3.81533
	11	0.0486146	0.184707	0.000211786	0.000216015	3.81026	0.047166	0.179592	0.000193364	0.000211114	3.81689	0.0452174	0.172163	0.000185835	0.000202126	3.81776	0.0458026	0.17434	0.000168003	0.000206703	3.8158
	12	0.0485742	0.184663	0.000198335	0.000215717	3.81253	0.0471777	0.179604	0.000166522	0.0002363	3.81618	0.0447831	0.170406	0.000169515	0.000230915	3.81553	0.0456714	0.173676	0.000162922	0.000217599	3.81221
	13	0.0472757	0.179748	0.000295583	0.000307804	3.81327	0.0474701	0.18071	0.000174712	0.000178097	3.81598	0.0451272	0.171586	0.000174985	0.000213023	3.81258	0.0459362	0.174942	0.000155868	0.000210603	3.8178
	14	0.0469521	0.178649	0.000195645	0.000227805	3.81615	0.0473616	0.180285	0.000149604	0.000219926	3.81573	0.0455399	0.173294	0.000190767	0.000181675	3.81554	0.0456255	0.173572	0.000216875	0.000279197	3.81377
	15	0.0471934	0.179449	0.000195824	0.000247037	3.8136	0.0476025	0.181287	0.000186758	0.000207869	3.81749	0.045452	0.17308	0.000191694	0.000171164	3.81823	0.0451775	0.17194	0.000150099	0.000234598	3.81546
	16	0.047021	0.178811	0.000201772	0.000227477	3.81401	0.0474649	0.180613	0.000188013	0.000227458	3.81434	0.0444638	0.169421	0.000161265	0.000211474	3.82081	0.0447981	0.170471	0.000192812	0.000194348	3.81499
	17	0.0479478	0.182415	0.000211577	0.000222475	3.81546	0.0477032	0.1814	0.000178687	0.00022722	3.81178	0.043978	0.167394	0.000180156	0.000192898	3.8169	0.045056	0.171525	0.000181813	0.000240225	3.81656
	18	0.0483247	0.183546	0.000195734	0.000188596	3.80908	0.0469364	0.17875	0.000148289	0.000230763	3.81761	0.0441038	0.16779	0.00016793	0.000186199	3.81498	0.0450366	0.171523	0.000195174	0.000210425	3.81815
	Cup	C	H3	C	H3		C	H3	C	H3		C	H3	C	H3		C	H3	C	H3
	Info	tbdgy	tbdgy	tbdgy	tbdgy		tbdgy	tbdgy	tbdgy	tbdgy		tbdgy	tbdgy	tbdgy	tbdgy		tbdgy	tbdgy	tbdgy	tbdgy
	Mean	0.0478167	0.181764	0.000196615	0.000222302		0.0472689	0.179897	0.000170768	0.000217022		0.0450291	0.171386	0.000173188	0.000195327		0.0453357	0.17257	0.000170082	0.000215838
	StdErr (%)	0.30983	0.305704	3.43492	2.82848		0.187525	0.183001	1.98461	2.08607		0.268257	0.266708	2.18965	2.30998		0.209304	0.208385	2.69865	3.01119
		isotope ratio (blank corrected)		30/29				not-blank corr
		1		3.8123				3.80127
		2		3.81501				3.80581
		3		3.81647				3.80613
		4		3.81606				3.8065
		average		3.81496	V/V			3.80493
				0.000245745				0.000322753
			S1	0.000425642	urel			0.000559024
		material w (WASO04)				material: WASO04 41963/04/72-75 part Mi 2.08
		waso_01		bl_09		30Si/29Si-corr_01	waso_02		bl_10		30Si/29Si-corr_02	waso_03		bl_11		30Si/29Si-corr_03	waso_04		bl_12		30Si/29Si-corr_04
	Cycle	29.074	30.084	29.074	30.084		29.074	30.084	29.074	30.084		29.074	30.084	29.074	30.084		29.074	30.084	29.074	30.084
	1	0.263014	0.185328	0.000142529	0.000178968	0.704298	0.260352	0.183498	0.000172244	0.000173459	0.704509	0.255731	0.180268	0.000197108	0.000238759	0.704572	0.242295	0.170765	0.000176666	0.000190451	0.704505
	2	0.265047	0.186832	0.000133921	0.000194686	0.704573	0.263339	0.185615	0.000181361	0.000212042	0.704559	0.259148	0.182586	0.000183986	0.000216877	0.704225	0.243089	0.171352	0.000178788	0.000180657	0.704615
	3	0.264741	0.186672	0.000116406	0.000193198	0.704784	0.265375	0.187036	0.000179448	0.000212042	0.704508	0.260891	0.183908	0.000178067	0.000224796	0.704587	0.245248	0.172909	0.000155922	0.000215518	0.704764
	4	0.265601	0.187202	0.000146265	0.000198646	0.704497	0.266468	0.187771	0.000133596	0.000209958	0.704375	0.251437	0.17723	0.000210799	0.000202855	0.70452	0.24592	0.173348	0.000177802	0.000187534	0.704624
	5	0.266536	0.187812	0.000137358	0.000212162	0.704313	0.267802	0.188685	0.000168478	0.000179205	0.704281	0.249647	0.176036	0.000179831	0.000235603	0.704789	0.243701	0.171755	0.000194511	0.000209892	0.704498
	6	0.268415	0.189168	0.00016961	0.000203082	0.704435	0.270012	0.190312	0.000156044	0.00020969	0.704542	0.249038	0.175457	0.000178874	0.000221075	0.704186	0.243125	0.171343	0.000166055	0.000204652	0.704474
	7	0.266281	0.187635	0.000171373	0.000189357	0.704326	0.262335	0.184927	0.000167223	0.000197961	0.704631	0.256329	0.180682	0.000200037	0.000218574	0.704544	0.249696	0.175968	0.000192986	0.000203848	0.704458
	8	0.265462	0.187092	0.000126209	0.000177003	0.704451	0.262368	0.184907	0.0001651	0.000179175	0.704468	0.258801	0.182435	0.000151256	0.000240009	0.704589	0.25275	0.178127	0.000189638	0.000192178	0.704491
	9	0.265239	0.186931	0.000115419	0.000198884	0.704435	0.26363	0.185808	0.000163187	0.000209422	0.704511	0.260199	0.18336	0.000155799	0.000240724	0.704357	0.257247	0.181337	0.000152813	0.000152253	0.704653
	10	0.260789	0.183734	0.000162257	0.000208381	0.704195	0.259424	0.182869	0.000165997	0.000189119	0.704604	0.25764	0.181588	0.000173703	0.000203778	0.704473	0.256822	0.181084	0.000198068	0.000199382	0.704834
	11	0.262579	0.185053	0.000147431	0.000189804	0.704421	0.26433	0.186284	0.000152845	0.000165392	0.704447	0.259261	0.182807	0.000195763	0.000215508	0.70477	0.258303	0.182103	0.000158163	0.000188218	0.704737
	12	0.266319	0.187613	0.00013425	0.000172954	0.704139	0.266795	0.187993	0.000169793	0.000196472	0.704344	0.260041	0.183328	0.000196959	0.000190262	0.704661	0.259718	0.183082	0.000207454	0.000236597	0.704667
	13	0.262455	0.184877	0.000150032	0.000177152	0.704083	0.268256	0.189086	0.000189731	0.000179175	0.704582	0.265126	0.186849	0.000172837	0.000209137	0.704424	0.262938	0.185314	0.000187875	0.000164074	0.704524
	14	0.261133	0.184005	0.000165545	0.000180218	0.704306	0.272224	0.191882	0.000186144	0.000221331	0.704584	0.2691	0.189663	0.00020772	0.000199074	0.70448	0.265407	0.187052	0.000166981	0.000209862	0.704521
	15	0.258671	0.182241	0.00016408	0.00015074	0.70419	0.274498	0.193461	0.000144028	0.000190845	0.704499	0.270991	0.191014	0.000185331	0.000217264	0.704547	0.265292	0.186953	0.000193763	0.000190094	0.704452
	16	0.25779	0.181684	0.000143187	0.000203201	0.704436	0.279011	0.196629	0.000176429	0.000197603	0.704456	0.270358	0.190586	0.000177769	0.000200205	0.704615	0.263528	0.185761	0.000185454	0.000195631	0.704643
	17	0.26262	0.185123	0.000143157	0.000195311	0.704579	0.280891	0.197953	0.000165907	0.00018117	0.704458	0.272311	0.191932	0.00017998	0.000213364	0.704504	0.26565	0.187233	0.000218962	0.000207331	0.704555
	18	0.265818	0.187327	0.000162765	0.000195311	0.704391	0.283267	0.199674	0.000158226	0.000196621	0.704626	0.272344	0.191927	0.000207002	0.000236228	0.704401	0.266776	0.188048	0.000196454	0.000212065	0.704635
	Cup	C	H3	C	H3		C	H3	C	H3		C	H3	C	H3		C	H3	C	H3
	Info	tbdgy	tbdgy	tbdgy	tbdgy		tbdgy	tbdgy	tbdgy	tbdgy		tbdgy	tbdgy	tbdgy	tbdgy		tbdgy	tbdgy	tbdgy	tbdgy
	Mean	0.263806	0.185907	0.000146211	0.000189948		0.268354	0.189133	0.000166432	0.000194482		0.261022	0.183981	0.000185157	0.000218005		0.254861	0.179641	0.000183242	0.00019668
	StdErr (%)	0.256205	0.257468	2.78189	1.85533		0.618617	0.618431	2.01054	1.92107		0.679933	0.679499	2.12897	1.68187		0.847026	0.847001	2.3367	2.31093
		isotope ratio (blank corrected)		30/29				not-blank corr
		1		0.704381				0.704711
		2		0.704499				0.704787
		3		0.704514				0.704849
		4		0.704592				0.704857
		average		0.704496	V/V			0.704801
				6.18022e-05				4.8072e-05
			S1	0.000107045	urel			8.32632e-05

## Sheet: raw data 1011 no rot 2 seq
	raw data: sample and IDMS measurement
	sample: Si28-33Pr11 Part N.2.1
	Sequence 2	no rotation
	10^11 Ohm, no rot. amplifiers
		sample (x, Si28)
		Si28_01		bl_01		30Si/29Si-corr_01	Si28_02		bl_02		30Si/29Si-corr_02	Si28_03		bl_03		30Si/29Si-corr_03	Si28_04		bl_04		30Si/29Si-corr_04
	Cycle	29.074	30.084	29.074	30.084		29.074	30.084	29.074	30.084		29.074	30.084	29.074	30.084		29.074	30.084	29.074	30.084
	1	0.0939379	0.00110483	0.00014368	0.000212098	0.00959846	0.0863219	0.000996039	0.0001267	0.000176894	0.00953562	0.0701493	0.00081262	0.000105382	0.000154933	0.0092847	0.072822	0.000829614	2.34788e-05	0.000122455	0.00972585
	2	0.0953794	0.00112178	0.000145862	0.000222131	0.00963117	0.0869037	0.000943138	0.000140091	0.000158105	0.00886207	0.0707244	0.000794513	6.8889e-05	0.000180749	0.00895274	0.0729192	0.000816301	4.80755e-05	0.000134097	0.00953019
	3	0.095235	0.00109613	0.000191983	0.000198761	0.00937601	0.0871193	0.00100063	0.000127657	0.000185885	0.00950095	0.0708669	0.000825933	0.000119968	0.000158745	0.00937865	0.0737466	0.000846351	5.07056e-05	9.88431e-05	0.00983095
	4	0.0937256	0.00109401	0.000151481	0.000159699	0.00950467	0.0881089	0.000983409	0.000122426	0.000162155	0.0091984	0.0700683	0.000840735	7.80646e-05	0.000153683	0.0096972	0.073403	0.000827618	4.88526e-05	0.000125105	0.00962161
	5	0.0944461	0.00110876	0.000147446	0.000233236	0.00958844	0.0895943	0.00104587	0.00011597	0.000154532	0.00974387	0.0703264	0.000775483	9.84184e-05	0.000151807	0.00873252	0.0736368	0.000836315	3.50748e-05	0.000108044	0.00970923
	6	0.0949343	0.00113069	0.000159641	0.000190365	0.00977039	0.0902584	0.00116325	0.000126461	0.000160934	0.0109744	0.070513	0.000824801	7.929e-05	0.000149901	0.00940971	0.0729915	0.000827976	6.49021e-05	0.000126326	0.00968079
	7	0.0962636	0.00113617	0.000148044	0.000200726	0.00969229	0.0897585	0.00105591	0.000124608	0.000159088	0.00983802	0.069727	0.000788408	6.98155e-05	0.000144512	0.0089933	0.0738951	0.000873275	3.31321e-05	0.000126862	0.0101758
	8	0.0971004	0.00111868	0.000144247	0.000183131	0.00942822	0.0906488	0.00103158	0.000132768	0.000162691	0.00947241	0.0695425	0.000800171	8.42215e-05	0.000182685	0.00918657	0.0738255	0.000822377	3.60909e-05	0.00012576	0.00949547
	9	0.0974648	0.00114339	0.000187021	0.000210967	0.00964682	0.0912569	0.00105883	0.00011053	0.000165579	0.00970829	0.0689663	0.000787961	0.000104546	0.000175062	0.00908614	0.0734869	0.000814842	4.63122e-05	0.000129274	0.00943664
	10	0.0981126	0.00111737	0.000150524	0.000219392	0.00931741	0.0902273	0.00102446	0.000131602	0.000164388	0.0094377	0.067065	0.000787753	8.50584e-05	0.000189146	0.00934098	0.073269	0.000852427	4.24568e-05	0.000130405	0.00997805
	11	0.0985031	0.00113289	0.000173989	0.000199654	0.00943824	0.090752	0.00102037	0.000129719	0.000178949	0.00933803	0.066712	0.000747995	8.00671e-05	0.000137097	0.0087937	0.0743345	0.000825027	6.30491e-05	0.000116649	0.00946608
	12	0.0990449	0.00115602	0.00016275	0.000196796	0.00962039	0.0919485	0.00101942	0.000146397	0.000188326	0.00920596	0.0663276	0.000747757	9.72827e-05	0.000140671	0.00884113	0.0748287	0.000831222	5.48599e-05	0.000109443	0.00948637
	13	0.0971441	0.00112896	0.000170521	0.000196677	0.00952996	0.0890407	0.000984183	0.000139822	0.000171385	0.00911071	0.0736729	0.000834331	0.00011136	0.000171608	0.00913514	0.0738828	0.000851474	8.84239e-05	0.000130226	0.00988219
	14	0.0981642	0.00112851	0.000165948	0.000220464	0.00942619	0.0888905	0.0010157	0.000112592	0.000192286	0.00948118	0.0735488	0.000832485	0.000115694	0.000158298	0.00912544	0.0742594	0.000857163	5.71613e-05	0.000102416	0.0099087
	15	0.0986181	0.00112896	0.000161883	0.000222369	0.00938728	0.0883211	0.00102848	0.000112084	0.000187999	0.00968728	0.0739586	0.000854643	9.29787e-05	0.000174258	0.00937479	0.0742111	0.000838667	5.5099e-05	0.000124212	0.00966576
	16	0.0981884	0.0011303	0.000163766	0.000207335	0.0094421	0.0895884	0.00100897	0.000117136	0.000214197	0.00933196	0.0733837	0.000858545	0.000113512	0.000195338	0.00950156	0.0726572	0.000872173	6.1734e-05	0.000124361	0.0103341
	17	0.0986694	0.00110459	0.000181043	0.000199773	0.009135	0.0908194	0.0010109	0.000130406	0.000186689	0.00922663	0.0735282	0.000823014	6.9158e-05	0.000147668	0.00899904	0.0749195	0.000832681	2.71249e-05	0.000117036	0.00949435
	18	0.0996791	0.00113816	0.000189891	0.000211681	0.0093797	0.0902966	0.00101212	0.000156739	0.000164179	0.00929368	0.0747275	0.0008483	6.81119e-05	0.000152581	0.00919322	0.0748134	0.000865889	4.90917e-05	0.000141541	0.00995199
	Cup	C	H3	C	H3		C	H3	C	H3		C	H3	C	H3		C	H3	C	H3
	Info	tbdgy	tbdgy	tbdgy	tbdgy		tbdgy	tbdgy	tbdgy	tbdgy		tbdgy	tbdgy	tbdgy	tbdgy		tbdgy	tbdgy	tbdgy	tbdgy
	Mean	0.0969228	0.00112334	0.000163318	0.000204736		0.0894364	0.0010224	0.000127984	0.000174126		0.0707671	0.000810303	9.12121e-05	0.000162152		0.0737723	0.000840077	4.92014e-05	0.000121836
	StdErr (%)	0.458161	0.349043	2.33123	1.968		0.413624	1.02909	2.27766	2.13921		0.860021	0.977552	4.56363	2.51998		0.22279	0.514415	7.43976	2.16102
		isotope ratio (blank corrected)		30/29				not-blank corr
		1		0.00949515				0.0115901
		2		0.00949706				0.0114316
		3		0.00916814				0.0114503
		4		0.009743				0.0113874
		average		0.00947584	V/V			0.0114649
				0.0124449				0.00381817
			S1	0.0215553	urel			0.00661327
		IDMS blend (bx)
		idms_01		bl_05		30Si/29Si-corr_01	idms_02		bl_06		30Si/29Si-corr_02	idms_03		bl_07		30Si/29Si-corr_03	idms_04		bl_08		30Si/29Si-corr_04
	Cycle	29.074	30.084	29.074	30.084		29.074	30.084	29.074	30.084		29.074	30.084	29.074	30.084		29.074	30.084	29.074	30.084
	1	0.0338953	0.129348	6.09655e-05	0.000130751	3.82035	0.0274776	0.105073	5.12116e-05	9.90766e-05	3.8271	0.0257004	0.0981928	6.45879e-05	8.64173e-05	3.82177	0.02799	0.107006	6.76493e-05	0.00010807	3.82555
	2	0.034056	0.130142	6.12345e-05	0.000109581	3.82567	0.0273203	0.104423	4.5832e-05	0.000118966	3.82535	0.025747	0.0983186	5.02718e-05	0.000111458	3.81974	0.0285979	0.10927	6.81873e-05	0.000122183	3.82341
	3	0.0341176	0.130322	6.88857e-05	0.000137451	3.82403	0.0275084	0.105148	4.69976e-05	0.000160653	3.82552	0.0256816	0.0981846	3.69124e-05	0.000118395	3.82426	0.0287058	0.109749	5.38413e-05	0.000152197	3.82571
	4	0.0341457	0.130416	9.24373e-05	0.00012423	3.82361	0.0276873	0.105979	6.20009e-05	0.000117716	3.83083	0.0272759	0.104287	3.07557e-05	0.000120361	3.82446	0.0285559	0.109096	5.64415e-05	0.000121201	3.82293
	5	0.0345261	0.131686	6.03678e-05	0.000122057	3.81828	0.0276442	0.105624	6.86956e-05	0.0001053	3.82395	0.0276836	0.10592	4.36668e-05	0.000101573	3.82711	0.0290631	0.111131	4.47557e-05	0.000136237	3.82626
	6	0.0343663	0.131193	4.88911e-05	0.000122533	3.82169	0.0275133	0.105175	4.09604e-05	0.000113428	3.82584	0.0285349	0.109039	4.78809e-05	0.000149839	3.82224	0.0290088	0.111071	2.85571e-05	0.000125816	3.83136
	7	0.0339422	0.129681	8.1588e-05	0.000135128	3.8249	0.0268141	0.102395	6.13732e-05	0.000107294	3.82193	0.0290063	0.110895	4.72532e-05	8.58219e-05	3.82413	0.0295665	0.113094	1.94417e-05	9.36588e-05	3.82748
	8	0.0335562	0.128299	8.28433e-05	0.000128518	3.82772	0.0269214	0.103071	4.80137e-05	0.000135432	3.8318	0.0290006	0.110931	2.07139e-05	9.43969e-05	3.82613	0.029871	0.11423	6.40927e-05	0.000118819	3.82651
	9	0.0336821	0.128669	7.0649e-05	0.000122801	3.82437	0.0265483	0.101615	6.71714e-05	0.000107354	3.83079	0.0290757	0.111003	3.07856e-05	0.000107289	3.81868	0.029633	0.113379	4.40384e-05	0.000118163	3.82851
	10	0.0334574	0.12773	7.04398e-05	0.000128995	3.822	0.0265902	0.101889	7.75722e-05	0.000123433	3.8351	0.0282765	0.107904	4.67751e-05	0.000139655	3.81702	0.0284098	0.108464	3.39964e-05	0.000124327	3.82033
	11	0.0332237	0.126998	4.57829e-05	8.15628e-05	3.82687	0.0268689	0.102694	4.0542e-05	9.05908e-05	3.82524	0.0282434	0.108008	4.91361e-05	9.38907e-05	3.82521	0.028286	0.108192	4.19164e-05	0.000128644	3.82746
	12	0.0333977	0.127513	8.95382e-05	0.000140637	3.82235	0.0268718	0.102706	5.99088e-05	7.89193e-05	3.82527	0.0285868	0.109193	1.87414e-05	0.000130782	3.8207	0.0281299	0.107442	5.05239e-05	0.000102204	3.82203
	13	0.032573	0.124652	7.34884e-05	0.000111308	3.8313	0.0268428	0.102726	1.94124e-05	9.64564e-05	3.83018	0.0296373	0.113206	-6.48218e-06	0.000137124	3.82067	0.027665	0.105595	4.98664e-05	0.000119414	3.81949
	14	0.0320314	0.122386	6.42232e-05	0.000110653	3.82532	0.0268727	0.102745	7.27603e-05	0.000116287	3.82662	0.0303396	0.116127	5.28421e-05	9.99648e-05	3.8285	0.0282397	0.107767	7.1744e-05	0.000111434	3.81868
	15	0.0316739	0.120869	6.97225e-05	0.000110415	3.82059	0.026545	0.101475	2.46723e-05	0.000139333	3.826	0.0302386	0.115536	2.84844e-05	0.000109761	3.82173	0.0285434	0.109059	7.57489e-05	0.000142341	3.82329
	16	0.0318926	0.121829	5.08636e-05	9.92489e-05	3.8245	0.02637	0.10078	5.06736e-05	0.000111165	3.82503	0.0292587	0.11175	3.10546e-05	0.000120182	3.82036	0.0290714	0.111144	4.21854e-05	0.000126054	3.82558
	17	0.0318266	0.121709	9.40812e-05	0.000123724	3.82867	0.0264185	0.100882	4.26042e-05	9.24071e-05	3.82187	0.029382	0.112329	3.39835e-05	0.000155734	3.82402	0.0293597	0.112195	4.56224e-05	0.000126381	3.82384
	18	0.0315832	0.120563	5.82458e-05	0.000119228	3.82189	0.0262277	0.100284	5.31244e-05	0.000105508	3.82687	0.0293522	0.11214	4.45335e-05	9.66895e-05	3.82146	0.0290751	0.111044	6.02073e-05	0.000151155	3.82167
	Cup	C	H3	C	H3		C	H3	C	H3		C	H3	C	H3		C	H3	C	H3
	Info	tbdgy	tbdgy	tbdgy	tbdgy		tbdgy	tbdgy	tbdgy	tbdgy		tbdgy	tbdgy	tbdgy	tbdgy		tbdgy	tbdgy	tbdgy	tbdgy
	Mean	0.0332193	0.126889	6.91249e-05	0.000119935		0.0269468	0.103038	5.18626e-05	0.000112184		0.0283901	0.108498	3.73276e-05	0.000114407		0.0287651	0.10994	5.10453e-05	0.000123794
	StdErr (%)	0.71737	0.712946	4.9521	2.84014		0.408882	0.409071	7.03786	4.06754		1.20901	1.21102	10.2021	4.37313		0.498062	0.510233	7.06173	2.90341
		isotope ratio (blank corrected)		30/29				not-blank corr
		1		3.82412				3.81975
		2		3.82696				3.82376
		3		3.82268				3.82169
		4		3.82445				3.822
		average		3.82455	V/V			3.8218
				0.000232807				0.00021497
			S1	0.000403233	urel			0.000372339
		material w (WASO04)				material: WASO04 41963/04/72-75 part Mi 2.08
		waso_01		bl_09		30Si/29Si-corr_01	waso_02		bl_10		30Si/29Si-corr_02	waso_03		bl_11		30Si/29Si-corr_03	waso_04		bl_12		30Si/29Si-corr_04
	Cycle	29.074	30.084	29.074	30.084		29.074	30.084	29.074	30.084		29.074	30.084	29.074	30.084		29.074	30.084	29.074	30.084
	1	0.167108	0.118043	5.85773e-05	0.000116329	0.705928	0.16081	0.113569	7.21966e-05	0.000124882	0.705834	0.145933	0.103074	-4.16697e-06	0.0001079	0.705625	0.145001	0.10245	5.99809e-05	7.81788e-05	0.706012
	2	0.166377	0.117444	6.77528e-05	0.000128805	0.70543	0.164304	0.116007	8.39426e-05	0.000145398	0.705659	0.147327	0.104115	4.08719e-05	0.000168256	0.706009	0.146386	0.103391	6.91264e-05	0.000131595	0.70576
	3	0.166776	0.11777	3.64909e-05	0.000119574	0.705693	0.166545	0.117623	4.81373e-05	0.000118064	0.705872	0.148681	0.10503	2.70941e-05	0.000120466	0.705739	0.147254	0.104032	5.39138e-05	0.00011239	0.705953
	4	0.168559	0.119055	4.99698e-05	0.000129907	0.705851	0.16614	0.117303	7.31829e-05	9.82333e-05	0.705664	0.148419	0.104828	3.62394e-05	0.000134609	0.705618	0.146836	0.103722	4.41108e-05	0.000140498	0.705855
	5	0.171823	0.121399	4.62638e-05	0.000114066	0.706088	0.166068	0.117267	5.70138e-05	0.000103831	0.705755	0.148893	0.105148	5.00772e-05	0.000130262	0.705519	0.147497	0.104205	8.94203e-05	0.000146096	0.705963
	6	0.173303	0.122323	5.67841e-05	0.000116924	0.705388	0.166	0.117188	4.53578e-05	0.000115771	0.705566	0.15068	0.106501	5.07646e-05	0.000140713	0.706134	0.148146	0.104681	6.51215e-05	0.000136419	0.706081
	7	0.172286	0.121622	2.53133e-05	7.22323e-05	0.705481	0.16465	0.116198	6.76238e-05	0.000121756	0.705339	0.151277	0.106888	5.93125e-05	0.000143035	0.705905	0.146747	0.103624	8.64913e-05	0.000100301	0.705616
	8	0.173866	0.122774	8.10827e-05	9.20621e-05	0.705698	0.165296	0.116718	8.54071e-05	0.000121369	0.705729	0.151528	0.107018	6.68442e-05	0.000160068	0.705594	0.148685	0.105024	7.03518e-05	0.000122097	0.70583
	9	0.174727	0.123389	3.76265e-05	0.000117133	0.705742	0.165638	0.116946	6.62191e-05	8.58171e-05	0.705652	0.151304	0.106829	5.66525e-05	0.000151581	0.705392	0.149427	0.105601	7.04415e-05	0.000144816	0.70619
	10	0.175398	0.123876	6.59595e-05	0.000116299	0.705818	0.165861	0.117081	8.29862e-05	7.70335e-05	0.705513	0.150938	0.106603	3.66877e-05	0.00015173	0.705601	0.147539	0.104202	7.89595e-05	0.000128796	0.705747
	11	0.175467	0.123873	5.61565e-05	0.000143931	0.705523	0.167011	0.117942	8.78579e-05	0.00013858	0.705808	0.151095	0.106695	6.56487e-05	0.000147919	0.705478	0.146064	0.103262	5.84865e-05	0.000110991	0.706435
	12	0.17502	0.12356	3.73277e-05	0.000116835	0.705536	0.16529	0.11674	5.41745e-05	9.8144e-05	0.70589	0.148938	0.105179	6.12253e-05	0.000126361	0.705515	0.145517	0.102829	6.19235e-05	0.000142523	0.706116
	13	0.175702	0.12407	3.90312e-05	9.64092e-05	0.705702	0.163745	0.115587	9.81395e-05	0.000120476	0.705504	0.147611	0.104284	4.9868e-05	0.000128624	0.705798	0.145046	0.102505	0.000105231	0.000211061	0.706176
	14	0.175508	0.12394	7.20865e-05	0.000103585	0.705739	0.162977	0.115149	3.63021e-05	0.000130332	0.706146	0.15089	0.106538	5.21394e-05	0.000135651	0.705396	0.14721	0.103982	7.28325e-05	0.000115516	0.705828
	15	0.176198	0.124364	6.66469e-05	0.00015605	0.705381	0.160586	0.113393	6.90285e-05	0.000103384	0.705723	0.152283	0.107569	4.36215e-05	0.000145269	0.705716	0.148514	0.10492	6.88276e-05	9.17857e-05	0.70594
	16	0.175093	0.123636	4.60247e-05	0.000119545	0.705676	0.159535	0.112692	5.26801e-05	9.5226e-05	0.705979	0.152209	0.10754	4.46975e-05	7.55951e-05	0.705868	0.150139	0.106093	6.2611e-05	9.17857e-05	0.706117
	17	0.173928	0.122806	6.7424e-05	0.000121808	0.705627	0.163137	0.115204	5.37262e-05	8.74249e-05	0.70579	0.152059	0.107431	0.000104862	0.000141755	0.705844	0.151551	0.107061	6.70044e-05	0.000134483	0.705925
	18	0.172636	0.121884	7.81836e-05	0.000104895	0.70557	0.163754	0.115649	8.2239e-05	0.000121071	0.70585	0.153172	0.108182	5.82963e-05	0.000138956	0.705618	0.15245	0.107636	8.02447e-05	0.000147913	0.705535
	Cup	C	H3	C	H3		C	H3	C	H3		C	H3	C	H3		C	H3	C	H3
	Info	tbdgy	tbdgy	tbdgy	tbdgy		tbdgy	tbdgy	tbdgy	tbdgy		tbdgy	tbdgy	tbdgy	tbdgy		tbdgy	tbdgy	tbdgy	tbdgy
	Mean	0.172765	0.12199	5.49279e-05	0.00011591		0.164297	0.116014	6.75675e-05	0.000111488		0.15018	0.106081	5.00409e-05	0.000136042		0.147778	0.104401	7.02822e-05	0.000127069
	StdErr (%)	0.452328	0.450818	6.88386	3.80657		0.31219	0.310011	5.97953	3.97947		0.315738	0.315128	10.1196	3.59357		0.332101	0.329553	4.74222	5.50622
		isotope ratio (blank corrected)		30/29				not-blank corr
		1		0.705659				0.706105
		2		0.705737				0.706125
		3		0.705687				0.706358
		4		0.705949				0.706472
		average		0.705758	V/V			0.706265
				9.28633e-05				0.00012699
			S1	0.000160844	urel			0.000219952

[truncated: 11 more sheets: raw data 1011 no rot 3 seq, raw data 1011 no rot 4 seq, raw data 1011 no rot 5 seq, raw data 1011 no rot 6 seq, MM N21 1013 no rot, raw data 1013 no rot 1 seq, raw data 1013 no rot 2 seq, raw data 1013 no rot 3 seq, raw data 1013 no rot 4 seq, raw data 1013 no rot 5 seq, raw data 1013 no rot 6 seq]
