# Supplementary material for: Comparison and influence of 1011 and 1013 ohm resistors used for MC-ICP-MS determination of isotope ratios in highly enriched silicon
Source: Royal Society of Chemistry journal article supplement (doi:10.1039/d4ja00066h), 2024-01-01
Supplement: d4ja00066h2.xlsx [file d4ja00066h2.xlsx]

## Sheet: N21 1011 Ohm no rot
comparison of amplifier statistics
sample N.2.1 1011 Ohm, no rotating amplifiers, 4000 ppm
sequence		sample x					blend bx					WASO w
		30Si/29Si/(V/V)					30Si/29Si/(V/V)					30Si/29Si/(V/V)
		ratio		bl.-corr ratio			ratio		bl.-corr ratio			ratio		bl.-corr ratio
		stabw/(n)^0.5	(stabw/(n)^0.5)/av	stabw/(n)^0.5	(stabw/(n)^0.5)/Av		stabw/(n)^0.5	(stabw/(n)^0.5)/av	stabw/(n)^0.5	(stabw/(n)^0.5)/Av		stabw/(n)^0.5	(stabw/(n)^0.5)/av	stabw/(n)^0.5	(stabw/(n)^0.5)/av
1		3.36936e-05	0.00276083	3.07914e-05	0.0032342		0.000345291	9.07482e-05	0.00030788	8.07034e-05		1.74211e-05	2.47178e-05	1.83214e-05	2.60063e-05
2		3.54276e-05	0.00308993	4.19727e-05	0.00442944		0.000411984	0.000107799	0.000418928	0.000109536		2.98427e-05	4.22542e-05	2.68962e-05	3.81096e-05
3		3.71371e-05	0.00303194	4.4914e-05	0.00458383		0.000291871	7.69699e-05	0.000323665	8.51243e-05		2.61122e-05	3.71567e-05	2.77774e-05	3.95482e-05
4		2.85929e-05	0.00253656	2.94979e-05	0.003106		0.000465568	0.000121917	0.00046797	0.000122477		3.27107e-05	4.63622e-05	3.61236e-05	5.12447e-05
5		4.84564e-05	0.00354028	3.95471e-05	0.00386505		0.000293646	7.73898e-05	0.000280937	7.3681e-05		1.73835e-05	2.47266e-05	1.77785e-05	2.52979e-05
6		0.00010546	0.0073387	8.84002e-05	0.00721587		0.000492855	0.000130297	0.000496598	0.000131102		2.55756e-05	3.63777e-05	2.5908e-05	3.68662e-05
av		3.66615e-05	0.00299191	3.73446e-05	0.0038437		0.000361672	9.49646e-05	0.000359876	9.43044e-05		2.46941e-05	3.50435e-05	2.53794e-05	3.60414e-05

## Sheet: N21 1013 Ohm no rot
comparison of amplifier statistics
sample N.2.1 1013 Ohm, no rotating amplifiers, 4000 ppm
sequence		sample x					blend bx					WASO w
		30Si/29Si/(V/V)					30Si/29Si/(V/V)					30Si/29Si/(V/V)
		ratio		bl.-corr ratio			ratio		bl.-corr ratio			ratio		bl.-corr ratio
		stabw/(n)^0.5	(stabw/(n)^0.5)/av	stabw/(n)^0.5	(stabw/(n)^0.5)/av		stabw/(n)^0.5	(stabw/(n)^0.5)/av	stabw/(n)^0.5	(stabw/(n)^0.5)/av		stabw/(n)^0.5	(stabw/(n)^0.5)/av	stabw/(n)^0.5	(stabw/(n)^0.5)/av
1		4.84564e-05	0.00354028	3.95471e-05	0.00386505		0.000293646	7.73898e-05	0.000280937	7.3681e-05		1.73835e-05	2.47266e-05	1.77785e-05	2.52979e-05
2		4.52882e-05	0.00363618	3.69276e-05	0.00324065		0.000291402	7.63548e-05	0.000293995	7.69634e-05		5.10428e-05	7.22927e-05	5.43557e-05	7.70355e-05
3		4.9553e-05	0.00391842	6.15433e-05	0.00534618		0.000254598	6.68327e-05	0.000264296	6.93764e-05		1.84159e-05	2.61307e-05	1.8125e-05	2.57364e-05
4		3.32909e-05	0.00288626	5.38165e-05	0.0051744		0.000228313	5.9697e-05	0.000219058	5.73063e-05		2.17352e-05	3.07979e-05	2.20821e-05	3.13214e-05
5		4.77752e-05	0.00398725	8.40368e-05	0.00831506		0.000311056	8.07722e-05	0.000282497	7.34088e-05		2.31651e-05	3.27129e-05	2.31177e-05	3.26935e-05
6		7.74533e-05	0.00556781	0.000102318	0.00909528		0.000301749	7.93076e-05	0.000269204	7.09038e-05		2.93735e-05	4.16633e-05	2.83585e-05	4.02882e-05
av		5.03028e-05	0.0039227	6.30316e-05	0.00583944		0.000280127	7.33923e-05	0.000268331	7.02733e-05		2.68527e-05	3.8054e-05	2.73029e-05	3.87288e-05
