# Supplementary material for: Comparison and influence of 1011 and 1013 ohm resistors used for MC-ICP-MS determination of isotope ratios in highly enriched silicon
Source: Royal Society of Chemistry journal article supplement (doi:10.1039/d4ja00066h), 2024-01-01
Supplement: d4ja00066h4.xlsx [file d4ja00066h4.xlsx]

## Sheet: raw data 1 seq
	raw data: sample and IDMS measurement																							tau-corrected data ->>
	sample: Si28-33Pr11 Part N.2.1																							tau correction
	Sequence 1	no rotation	10^13 Ohm																							tau constant
																								cup	C	0.6061
		sample (x, Si28)																						cup	H3	0.5266
		Si28_01		bl_01		30Si/29Si-corr_01	Si28_02		bl_02		30Si/29Si-corr_02	Si28_03		bl_03		30Si/29Si-corr_03	Si28_04		bl_04		30Si/29Si-corr_04			Si28_01			bl_01			30Si/29Si-corr_01	Si28_02			bl_02			30Si/29Si-corr_02	Si28_03			bl_03			30Si/29Si-corr_03	Si28_04			bl_04
	Cycle	29.076	30.085	29.076	30.085		29.076	30.085	29.076	30.085		29.076	30.085	29.076	30.085		29.076	30.085	29.076	30.085				time	29.078	30.09	Time	29.078	30.09		time	29.078	30.09	time	29.078	30.09		time	29.078	30.09	time	29.078	30.09		time	29.078	30.09	time	29.078
	1	0.0954643	0.001357	0.000393778	0.000338465	0.0108379	0.0925241	0.00128749	0.000392329	0.000322966	0.0103956	0.0887864	0.00118775	0.000366575	0.000272621	0.0099717	0.0848051	0.00113322	0.000320115	0.000303793	0.00998851			1.69323e+09			1.69323e+09				1.69323e+09			1.69323e+09				1.69323e+09			1.69323e+09				1.69323e+09			1.69323e+09
	2	0.0952782	0.00130341	0.000391925	0.000313275	0.0102944	0.0921973	0.00129595	0.000379506	0.000323562	0.0105247	0.0880449	0.00118856	0.000334474	0.000300191	0.0100652	0.0865453	0.00113525	0.00031605	0.000294266	0.0098104			1.69323e+09	0.0952306	0.00130048	1.69323e+09	0.000387451	0.00031163	0.0102701	1.69323e+09	0.0921338	0.00129351	1.69323e+09	0.000375065	0.000326053	0.0104776	1.69323e+09	0.0879643	0.00118961	1.69323e+09	0.000331427	0.00030232	0.0100853	1.69323e+09	0.0866716	0.00113584	1.69323e+09	0.000315023
	3	0.0948056	0.00131035	0.000331817	0.000312233	0.0104195	0.091644	0.00124856	0.000330817	0.000362686	0.0100693	0.0876698	0.00120455	0.000324372	0.000306563	0.0102916	0.0865539	0.00114265	0.000305889	0.000308676	0.00989521			1.69323e+09	0.0947527	0.00131056	1.69323e+09	0.000329396	0.000311883	0.0104289	1.69323e+09	0.0916971	0.00124774	1.69323e+09	0.00032977	0.00036196	0.0100265	1.69323e+09	0.0876134	0.0012048	1.69323e+09	0.000323651	0.000307174	0.0102999	1.69323e+09	0.0865722	0.00114443	1.69323e+09	0.000305335
	4	0.0940747	0.00130901	0.000336808	0.000304105	0.0104864	0.0934054	0.00127444	0.000355654	0.000304536	0.0101569	0.0867624	0.00119499	0.000318036	0.000316209	0.010289	0.0869627	0.00118214	0.000303438	0.000289561	0.0103044			1.69323e+09	0.094027	0.00130933	1.69323e+09	0.000338155	0.000305034	0.0104966	1.69323e+09	0.0934708	0.00127536	1.69323e+09	0.000358594	0.000303074	0.0101322	1.69323e+09	0.0867376	0.0011932	1.69323e+09	0.000318798	0.000316579	0.0102701	1.69323e+09	0.0869754	0.00118252	1.69323e+09	0.000304879
	5	0.0937183	0.00131881	0.000362483	0.000336589	0.0106315	0.0931336	0.00127262	0.000397769	0.000324365	0.010167	0.0871053	0.00115767	0.000341737	0.000316239	0.00981818	0.086843	0.0011525	0.000338706	0.000262528	0.00997609			1.69323e+09	0.0937163	0.00132049	1.69323e+09	0.000366256	0.000337971	0.0106511	1.69323e+09	0.0930435	0.00127139	1.69323e+09	0.000397104	0.000325434	0.0101361	1.69323e+09	0.0872202	0.00115879	1.69323e+09	0.000342296	0.000315348	0.00981694	1.69323e+09	0.0867898	0.00115041	1.69323e+09	0.000338183
	6	0.094046	0.00133579	0.000389055	0.000326138	0.0107756	0.0921574	0.00125481	0.000346449	0.000321567	0.0100811	0.0883544	0.00121286	0.000325777	0.000302007	0.0103059	0.0862247	0.00114875	0.000296205	0.00026354	0.0100042			1.69323e+09	0.0940775	0.00133613	1.69323e+09	0.000389538	0.000325738	0.0107769	1.69323e+09	0.0920542	0.0012549	1.69323e+09	0.000345884	0.000321633	0.0100656	1.69323e+09	0.0884507	0.00121494	1.69323e+09	0.000325661	0.000301162	0.0103171	1.69323e+09	0.0861933	0.0011476	1.69323e+09	0.000295332
	7	0.0944345	0.00132781	0.000373483	0.000326108	0.0106462	0.090784	0.00127483	0.000384916	0.000326092	0.0104557	0.0892968	0.00121218	0.000339286	0.000295695	0.0101891	0.086128	0.00112241	0.000320265	0.000275598	0.00970847			1.69323e+09	0.0944555	0.00132802	1.69323e+09	0.000372173	0.000326983	0.0106474	1.69323e+09	0.0907319	0.00127434	1.69323e+09	0.000388072	0.000327178	0.0104281	1.69323e+09	0.0893006	0.00121159	1.69323e+09	0.000341017	0.000297036	0.0101809	1.69323e+09	0.0861774	0.00112267	1.69323e+09	0.000321408
	8	0.094523	0.00134148	0.000359225	0.000349065	0.0107814	0.0909714	0.001242	0.000418304	0.000350031	0.0100717	0.0884414	0.00119749	0.000362331	0.00033461	0.0101213	0.0873505	0.0011556	0.000320354	0.000300488	0.00995351			1.69323e+09	0.0944915	0.00134028	1.69323e+09	0.000361304	0.000347518	0.0107736	1.69323e+09	0.0909883	0.00123968	1.69323e+09	0.000425034	0.000354897	0.010016	1.69323e+09	0.0883802	0.00119765	1.69323e+09	0.000363192	0.000335565	0.010129	1.69323e+09	0.0874671	0.00115893	1.69323e+09	0.000320659
	9	0.0939976	0.00130874	0.000402267	0.000301455	0.0104922	0.0910175	0.00123777	0.000478117	0.000403658	0.0100199	0.0884504	0.00121468	0.000351212	0.00031091	0.0103153	0.0877423	0.00117547	0.000324479	0.000289323	0.0101362			1.69323e+09	0.0938916	0.00130642	1.69323e+09	0.000405934	0.000302521	0.0104806	1.69323e+09	0.0910121	0.00123946	1.69323e+09	0.000476064	0.000402371	0.010011	1.69323e+09	0.0884853	0.00121443	1.69323e+09	0.000349568	0.000309605	0.0103072	1.69323e+09	0.0876745	0.00117516	1.69323e+09	0.000323816
	10	0.0921103	0.00128065	0.00044271	0.000376995	0.0104018	0.0908478	0.00128618	0.000371526	0.000316297	0.0105737	0.0892949	0.00119035	0.00032491	0.000300429	0.00994383	0.0858072	0.00114747	0.000305261	0.000277593	0.0100381			1.69323e+09	0.0919944	0.00127914	1.69323e+09	0.000442978	0.000379443	0.0104	1.69323e+09	0.0908841	0.0012869	1.69323e+09	0.000366453	0.000313397	0.0105493	1.69323e+09	0.0893663	0.00119092	1.69323e+09	0.000324593	0.000299791	0.00994122	1.69323e+09	0.085759	0.00114451	1.69323e+09	0.000304623
	11	0.0913594	0.00126933	0.000408365	0.00036562	0.0103633	0.0918436	0.00125675	0.000362589	0.000327641	0.0101368	0.0901946	0.00123094	0.000343979	0.000294177	0.0102961	0.0866447	0.00109789	0.000309953	0.000282475	0.00936632			1.69323e+09	0.0913026	0.00127195	1.69323e+09	0.000404868	0.000363205	0.0104	1.69323e+09	0.0919606	0.00125526	1.69323e+09	0.00036334	0.000327022	0.0100799	1.69323e+09	0.0901909	0.00123167	1.69323e+09	0.000345645	0.000295307	0.0103035	1.69323e+09	0.0867045	0.001099	1.69323e+09	0.000310122
	12	0.0913242	0.0013225	0.000394286	0.000338495	0.0109519	0.0924676	0.0012625	0.000381927	0.000306441	0.0101306	0.0892446	0.00120193	0.000347984	0.000318443	0.0100798	0.0866354	0.00116519	0.000307592	0.000268452	0.0101471			1.69323e+09	0.0912121	0.00132324	1.69323e+09	0.000392627	0.000336232	0.010975	1.69323e+09	0.0924213	0.00126201	1.69323e+09	0.000379946	0.000306111	0.0101028	1.69323e+09	0.0891753	0.0012	1.69323e+09	0.000348295	0.000318721	0.0100647	1.69323e+09	0.0865793	0.00116614	1.69323e+09	0.000307747
	13	0.0888069	0.00128875	0.000370583	0.000306308	0.010882	0.0907879	0.00124409	0.000317457	0.000319602	0.0101152	0.0887314	0.00118385	0.000351062	0.000301471	0.00993376	0.0853678	0.00112271	0.00031348	0.000312904	0.00979876			1.69323e+09	0.088647	0.00128671	1.69323e+09	0.00036846	0.000305506	0.0108801	1.69323e+09	0.0906679	0.00124453	1.69323e+09	0.000317139	0.000320588	0.0101053	1.69323e+09	0.0887102	0.00118239	1.69323e+09	0.000350654	0.000299617	0.00991848	1.69323e+09	0.0852465	0.00112163	1.69323e+09	0.000314352
	14	0.0876822	0.00126906	0.000345924	0.000317474	0.0107967	0.0897339	0.0012742	0.000374694	0.00033041	0.0105715	0.0887963	0.00116643	0.000338689	0.000269852	0.00972948	0.0838731	0.00113712	0.000327438	0.000255829	0.0101466			1.69323e+09	0.0875759	0.00126744	1.69323e+09	0.000343697	0.000318071	0.0107927	1.69323e+09	0.0896637	0.0012743	1.69323e+09	0.000377139	0.000330748	0.0105524	1.69323e+09	0.0888549	0.00116695	1.69323e+09	0.000337817	0.000271413	0.00972782	1.69323e+09	0.0837549	0.00113786	1.69323e+09	0.000329434
	15	0.0873357	0.00126292	0.000339737	0.000315836	0.0107691	0.0898167	0.00124564	0.000351321	0.000324991	0.0102423	0.089543	0.00119219	0.000338987	0.000326363	0.00993687	0.0837315	0.00113435	0.000341126	0.000277325	0.0101307			1.69323e+09	0.087361	0.00126227	1.69323e+09	0.00033998	0.000316073	0.0107599	1.69323e+09	0.089915	0.00124351	1.69323e+09	0.000351037	0.000324397	0.0101789	1.69323e+09	0.0895539	0.00119227	1.69323e+09	0.00033927	0.000327679	0.00993538	1.69323e+09	0.083823	0.00113459	1.69323e+09	0.00034015
	16	0.0882582	0.00125184	0.000351454	0.000323696	0.01053	0.0919716	0.00121856	0.000368238	0.000313736	0.00970576	0.0890434	0.00116842	0.000345115	0.000304359	0.00972487	0.0861087	0.00114366	0.000305201	0.000291794	0.00995837			1.69323e+09	0.0882409	0.00125184	1.69323e+09	0.000352172	0.000323464	0.0105335	1.69323e+09	0.092081	0.00121953	1.69323e+09	0.000370718	0.000314806	0.00967702	1.69323e+09	0.0889939	0.00116849	1.69323e+09	0.000345901	0.000303032	0.00972991	1.69323e+09	0.0861747	0.00114381	1.69323e+09	0.000304964
	17	0.086942	0.00126289	0.000356087	0.000309732	0.0108178	0.0923102	0.00127119	0.000407812	0.000355063	0.0102425	0.0884171	0.00119392	0.000356891	0.000291586	0.0100835	0.085343	0.00113871	0.000335717	0.000286465	0.00998991			1.69323e+09	0.0867083	0.00126284	1.69323e+09	0.000358458	0.000309125	0.0108479	1.69323e+09	0.0923346	0.00127608	1.69323e+09	0.000408531	0.000354116	0.0102652	1.69323e+09	0.0883228	0.00119572	1.69323e+09	0.000358179	0.000294017	0.0101137	1.69323e+09	0.0852771	0.00113878	1.69323e+09	0.000347583
	18	0.085021	0.00125095	0.000384303	0.00031402	0.0109222	0.0923101	0.0012964	0.000378191	0.000298641	0.0105167	0.0877371	0.00119717	0.000362958	0.000343096	0.0101991	0.0851965	0.00114473	0.000469535	0.000368554	0.010078			1.69323e+09			1.69323e+09				1.69323e+09			1.69323e+09				1.69323e+09			1.69323e+09				1.69323e+09			1.69323e+09
	Cup	C	H3	C	H3		C	H3	C	H3		C	H3	C	H3		C	H3	C	H3
	Info	tbdgy	tbdgy	tbdgy	tbdgy		tbdgy	tbdgy	tbdgy	tbdgy		tbdgy	tbdgy	tbdgy	tbdgy		tbdgy	tbdgy	tbdgy	tbdgy
	Mean	0.0916212	0.0012984	0.000374127	0.000326423		0.0916625	0.00126355	0.000377645	0.000329571		0.0885508	0.00119422	0.000343021	0.000305823		0.0859924	0.00114332	0.0003256	0.000289398			Mean		0.0917303	0.00129732		0.000372091	0.000326275			0.0915662	0.00125991		0.000376868	0.000332112			0.0885825	0.00119459		0.000340373	0.000305898			0.086115	0.00114399		0.000317726
	StdErr (%)	0.872463	0.59053	1.83832	1.52002		0.266876	0.402505	2.22887	1.778		0.230333	0.358159	0.971793	1.44497		0.301801	0.404247	2.75954	2.07533
		isotope ratio (blank corrected)		30/29				not-blank corr																isotope ratio (blank corrected)		30/29				not-blank corr
		1		0.0106556				0.0141714																1		0.0106321				0.0141428
		2		0.0102321				0.0137849																2		0.0101752				0.0137595
		3		0.0100719				0.0134863																3		0.0100713				0.0134856
		4		0.00996838		29/30		0.0132956																4		0.010027				0.0132845
		average		0.010232	V/V	97.7328		0.0136846																average		0.0102264	V/V			0.0136681	V/V
				0.014782				0.0139561																		0.0135683				0.0135921
			S1	0.0256032	urel			0.0241727																	S1	0.0235011	urel			0.0235422
		IDMS blend (bx)
		idms_01		bl_05		30Si/29Si-corr_01	idms_02		bl_06		30Si/29Si-corr_02	idms_03		bl_07		30Si/29Si-corr_03	idms_04		bl_08		30Si/29Si-corr_04			idms_01			bl_05			30Si/29Si-corr_01	idms_02			bl_06			30Si/29Si-corr_02	idms_03			bl_07			30Si/29Si-corr_03	idms_04			bl_08
	Cycle	29.076	30.085	29.076	30.085		29.076	30.085	29.076	30.085		29.076	30.085	29.076	30.085		29.076	30.085	29.076	30.085				time	29.078	30.09	time	29.078	30.09		time	29.078	30.09	time	29.078	30.09		time	29.078	30.09	time	29.078	30.09		time	29.078	30.09	time	29.078
	1	0.0451367	0.171473	0.000290443	0.000304358	3.8159	0.0429071	0.162875	0.00027182	0.000283077	3.81465	0.0422399	0.160316	0.000282163	0.000273186	3.81472	0.0406254	0.154132	0.000292219	0.000243829	3.81338			1.69323e+09			1.69323e+09				1.69323e+09			1.69323e+09				1.69323e+09			1.69323e+09				1.69323e+09			1.69323e+09
	2	0.0452683	0.171764	0.000298154	0.000275597	3.81119	0.0431321	0.163723	0.000271671	0.000256491	3.81441	0.0422686	0.160576	0.000290561	0.000249398	3.81831	0.0405671	0.153831	0.000283851	0.000266932	3.81144			1.69323e+09	0.0452695	0.171764	1.69323e+09	0.000296041	0.000271646	3.8111	1.69323e+09	0.0431556	0.163796	1.69323e+09	0.000273875	0.000252839	3.81414	1.69323e+09	0.0422678	0.160566	1.69323e+09	0.000289395	0.000248299	3.81807	1.69323e+09	0.0405526	0.153782	1.69323e+09	0.000280006
	3	0.045153	0.171479	0.000261183	0.000241388	3.81463	0.0432326	0.164045	0.000302349	0.000224873	3.81298	0.0422292	0.160161	0.000266008	0.000255679	3.81202	0.0404238	0.153342	0.00023897	0.000232486	3.81287			1.69323e+09	0.0451411	0.171443	1.69323e+09	0.000259595	0.000241632	3.81484	1.69323e+09	0.0432413	0.164078	1.69323e+09	0.000302176	0.000225808	3.81309	1.69323e+09	0.0422338	0.160171	1.69323e+09	0.000266339	0.000256538	3.81175	1.69323e+09	0.0404187	0.15333	1.69323e+09	0.000239562
	4	0.0449981	0.170815	0.00026199	0.000281968	3.813	0.0433318	0.1646	0.000267725	0.000279237	3.81709	0.0423653	0.160806	0.000298093	0.000271905	3.81501	0.0404493	0.153516	0.00029733	0.000242251	3.81477			1.69323e+09	0.0449992	0.170817	1.69323e+09	0.000261904	0.000282912	3.81296	1.69323e+09	0.043346	0.164653	1.69323e+09	0.000268623	0.000280417	3.81717	1.69323e+09	0.0423666	0.160813	1.69323e+09	0.00029714	0.000271071	3.81497	1.69323e+09	0.0404556	0.153537	1.69323e+09	0.000298172
	5	0.0451761	0.171529	0.000259227	0.000266129	3.81378	0.0435557	0.165431	0.000322792	0.000253573	3.81653	0.0422577	0.160315	0.000244306	0.000233827	3.81309	0.0405678	0.153902	0.000258161	0.000288994	3.81314			1.69323e+09	0.0451673	0.171479	1.69323e+09	0.000258836	0.000265089	3.81342	1.69323e+09	0.0435858	0.165518	1.69323e+09	0.000323789	0.000251909	3.816	1.69323e+09	0.0422558	0.160311	1.69323e+09	0.000242536	0.000236479	3.81308	1.69323e+09	0.0405664	0.153888	1.69323e+09	0.00025605
	6	0.0448753	0.170017	0.000256567	0.000265385	3.80561	0.043749	0.165996	0.000281518	0.000252709	3.81256	0.0423386	0.160733	0.000273571	0.000314183	3.81569	0.0404305	0.153297	0.000268086	0.000225519	3.81109			1.69323e+09	0.0448557	0.169952	1.69323e+09	0.000257242	0.00026496	3.80583	1.69323e+09	0.0437493	0.165992	1.69323e+09	0.00027763	0.000252298	3.81255	1.69323e+09	0.0423373	0.160737	1.69323e+09	0.000274621	0.000315873	3.81582	1.69323e+09	0.0403991	0.153187	1.69323e+09	0.000268318
	7	0.0447312	0.16983	0.000274602	0.000254994	3.81374	0.0435619	0.165339	0.000234245	0.000242795	3.81387	0.0422272	0.160412	0.000268221	0.000278128	3.81818	0.0398528	0.15103	0.000263452	0.000264014	3.80945			1.69323e+09	0.0447436	0.169879	1.69323e+09	0.000273867	0.000255031	3.81377	1.69323e+09	0.0435542	0.165313	1.69323e+09	0.000231481	0.000241685	3.81404	1.69323e+09	0.0422189	0.160384	1.69323e+09	0.000266803	0.000277119	3.81818	1.69323e+09	0.0398386	0.150988	1.69323e+09	0.000263755
	8	0.0451577	0.171292	0.000239827	0.000266337	3.81008	0.0435747	0.165306	0.000218582	0.000223623	3.81198	0.0421497	0.159992	0.000241287	0.000287744	3.8152	0.040109	0.1522	0.000274991	0.000276698	3.81432			1.69323e+09	0.0451941	0.171414	1.69323e+09	0.000240925	0.000268274	3.80971	1.69323e+09	0.0435735	0.165297	1.69323e+09	0.000221409	0.000223275	3.81198	1.69323e+09	0.0421455	0.159958	1.69323e+09	0.000242179	0.000288443	3.81469	1.69323e+09	0.0401523	0.152347	1.69323e+09	0.00027906
	9	0.0452353	0.171776	0.000289815	0.000285868	3.81426	0.043545	0.165197	0.000273405	0.000237258	3.81208	0.0421699	0.159868	0.000280579	0.000289263	3.81042	0.0404524	0.153385	0.000319805	0.000307751	3.81121			1.69323e+09	0.045252	0.171835	1.69323e+09	0.000291181	0.000285369	3.81416	1.69323e+09	0.0435556	0.165235	1.69323e+09	0.000277996	0.000238305	3.81213	1.69323e+09	0.0421698	0.159865	1.69323e+09	0.000283269	0.000290391	3.81028	1.69323e+09	0.0404867	0.153493	1.69323e+09	0.0003195
	10	0.0455384	0.172829	0.000270926	0.000253238	3.81198	0.0438161	0.166306	0.000323151	0.000251072	3.8138	0.042147	0.159905	0.000302546	0.00031731	3.81337	0.0408902	0.155039	0.000267547	0.000244752	3.81085			1.69323e+09	0.0455545	0.172877	1.69323e+09	0.000268074	0.000252042	3.8117	1.69323e+09	0.0438279	0.166338	1.69323e+09	0.000323745	0.000251867	3.81361	1.69323e+09	0.0421436	0.159894	1.69323e+09	0.00030658	0.000318428	3.81335	1.69323e+09	0.040907	0.155091	1.69323e+09	0.000265997
	11	0.0456034	0.173051	0.00022488	0.000254548	3.81141	0.0438144	0.166043	0.000286928	0.000258098	3.80792	0.0420885	0.15957	0.000372454	0.00031859	3.81069	0.0408335	0.154762	0.000281938	0.000264789	3.80935			1.69323e+09	0.0456065	0.173056	1.69323e+09	0.000226171	0.000255487	3.81127	1.69323e+09	0.0437911	0.165967	1.69323e+09	0.000282779	0.000257857	3.80831	1.69323e+09	0.0420522	0.159437	1.69323e+09	0.000374367	0.000317002	3.81075	1.69323e+09	0.0408398	0.15479	1.69323e+09	0.000280358
	12	0.0455813	0.172908	0.000288799	0.000268213	3.81012	0.0434932	0.165089	0.000265692	0.000247231	3.81414	0.0416443	0.157791	0.000329026	0.000292002	3.8086	0.0409774	0.155496	0.000245666	0.000252492	3.81392			1.69323e+09	0.0455716	0.17288	1.69323e+09	0.000290309	0.00026803	3.81032	1.69323e+09	0.0434888	0.165086	1.69323e+09	0.000264756	0.000248248	3.81457	1.69323e+09	0.0416039	0.157664	1.69323e+09	0.000324815	0.000288775	3.80918	1.69323e+09	0.0409808	0.155515	1.69323e+09	0.000244515
	13	0.0453835	0.172319	0.000259287	0.000249754	3.81376	0.0437124	0.165976	0.000265602	0.000284745	3.81532	0.0411686	0.156237	0.000276531	0.000234006	3.81491	0.0409184	0.155285	0.00025574	0.000272053	3.81427			1.69323e+09	0.0453768	0.172299	1.69323e+09	0.000257797	0.000249927	3.81389	1.69323e+09	0.0437285	0.166023	1.69323e+09	0.000266305	0.000286323	3.81509	1.69323e+09	0.0411686	0.156244	1.69323e+09	0.00027486	0.000232905	3.81501	1.69323e+09	0.0409223	0.155293	1.69323e+09	0.000257592
	14	0.0454271	0.172389	0.000254863	0.000272739	3.81163	0.0438585	0.166316	0.000281698	0.000288615	3.81033	0.0416442	0.157971	0.00029098	0.000263152	3.81298	0.0410726	0.155714	0.000287855	0.000277115	3.81036			1.69323e+09	0.0454289	0.172392	1.69323e+09	0.000256277	0.000272752	3.81156	1.69323e+09	0.0438691	0.166343	1.69323e+09	0.00028281	0.000287338	3.81013	1.69323e+09	0.0417129	0.158198	1.69323e+09	0.000290751	0.000265718	3.81205	1.69323e+09	0.0410787	0.155738	1.69323e+09	0.000290541
	15	0.0454083	0.172376	0.000278876	0.000249963	3.81292	0.04386	0.166414	0.00028101	0.00026438	3.81245	0.0421198	0.15985	0.000273362	0.000274912	3.81453	0.0410032	0.155665	0.000292936	0.000249545	3.81565			1.69323e+09	0.0454036	0.172361	1.69323e+09	0.00027978	0.000249278	3.81299	1.69323e+09	0.0438492	0.166388	1.69323e+09	0.000281123	0.000262853	3.8129	1.69323e+09	0.0421589	0.159982	1.69323e+09	0.00027299	0.000275726	3.81405	1.69323e+09	0.0410017	0.155663	1.69323e+09	0.000292763
	16	0.0453192	0.171993	0.000276934	0.000253506	3.81198	0.0436122	0.165636	0.000284268	0.000245683	3.8163	0.0425335	0.161435	0.000282492	0.000284469	3.81471	0.0410382	0.155675	0.00028391	0.000268183	3.81263			1.69323e+09	0.0453229	0.172002	1.69323e+09	0.000277965	0.000253305	3.81186	1.69323e+09	0.0436067	0.165622	1.69323e+09	0.000284424	0.000246046	3.81656	1.69323e+09	0.0425531	0.161496	1.69323e+09	0.000283003	0.000283821	3.8143	1.69323e+09	0.041036	0.155656	1.69323e+09	0.000282952
	17	0.0454936	0.172601	0.000304071	0.000244336	3.81072	0.0437335	0.166034	0.000284567	0.000274562	3.81481	0.0425661	0.161431	0.000285002	0.000257912	3.81167	0.0409533	0.155172	0.000271105	0.000235671	3.80822			1.69323e+09	0.0454835	0.172572	1.69323e+09	0.000302964	0.000246067	3.81093	1.69323e+09	0.0437302	0.166015	1.69323e+09	0.00028402	0.000276184	3.81475	1.69323e+09	0.0425465	0.161359	1.69323e+09	0.000286603	0.00025746	3.81166	1.69323e+09	0.0409561	0.155174	1.69323e+09	0.00026941
	18	0.0451788	0.171519	0.000261602	0.000281105	3.81333	0.0435669	0.165328	0.000276693	0.000271526	3.81318	0.0422623	0.160291	0.000304668	0.000277264	3.8121	0.0410766	0.155709	0.000260433	0.000247431	3.80987			1.69323e+09			1.69323e+09				1.69323e+09			1.69323e+09				1.69323e+09			1.69323e+09				1.69323e+09			1.69323e+09
	Cup	C	H3	C	H3		C	H3	C	H3		C	H3	C	H3		C	H3	C	H3
	Info	tbdgy	tbdgy	tbdgy	tbdgy		tbdgy	tbdgy	tbdgy	tbdgy		tbdgy	tbdgy	tbdgy	tbdgy		tbdgy	tbdgy	tbdgy	tbdgy
	Mean	0.0452592	0.171776	0.000269558	0.000264968		0.0435587	0.165314	0.000277429	0.000257753		0.0421345	0.15987	0.000286769	0.000276274		0.0406801	0.154286	0.000274666	0.000258917			Mean		0.0452732	0.171814		0.000268683	0.000261363			0.0436033	0.165479		0.000277934	0.000255203			0.0421209	0.159817		0.000286016	0.000276503			0.040662	0.154217		0.000274284
	StdErr (%)	0.12437	0.125053	1.78216	1.46968		0.142253	0.138042	2.14003	1.79297		0.188788	0.193208	2.44503	2.15092		0.203811	0.204771	1.71258	1.93003
		isotope ratio (blank corrected)		30/29				not-blank corr																isotope ratio (blank corrected)		30/29				not-blank corr
		1		3.81222				3.79537																1		3.8119				3.79505
		2		3.81358				3.7952																2		3.81356				3.79511
		3		3.81368				3.79428																3		3.81358				3.79425
		4		3.81204				3.79267																4		3.81196				3.79266
		average		3.81288	V/V			3.79438																average		3.81275	V/V			3.79426	V/V
				0.000113639				0.000163119																		0.000124309				0.000150392
			S1	0.000196829	urel			0.000282531																	S1	0.00021531	urel			0.000260486
		material w (WASO04)				material: WASO04 41963/04/72-75 part Mi 2.08
		waso_01		bl_09		30Si/29Si-corr_01	waso_02		bl_10		30Si/29Si-corr_02	waso_03		bl_11		30Si/29Si-corr_03	waso_04		bl_12		30Si/29Si-corr_04			waso_01			bl_09			30Si/29Si-corr_01	waso_02			bl_10			30Si/29Si-corr_02	waso_03			bl_11			30Si/29Si-corr_03	waso_04			bl_12
	Cycle	29.076	30.085	29.076	30.085		29.076	30.085	29.076	30.085		29.076	30.085	29.076	30.085		29.076	30.085	29.076	30.085				time	29.078	30.09	time	29.078	30.09		time	29.078	30.09	time	29.078	30.09		time	29.078	30.09	time	29.078	30.09		time	29.078	30.09	time	29.078
	1	0.237755	0.167149	0.000292373	0.000259644	0.702754	0.240485	0.169069	0.000321487	0.000276786	0.702747	0.239417	0.168383	0.000311287	0.000296165	0.703026	0.23006	0.161752	0.000372658	0.000308013	0.702838			1.69324e+09			1.69324e+09				1.69324e+09			1.69324e+09				1.69324e+09			1.69324e+09				1.69324e+09			1.69324e+09
	2	0.237294	0.166836	0.000266684	0.000228354	0.702794	0.23825	0.167461	0.000312222	0.000302094	0.70259	0.23728	0.166814	0.00031574	0.000298219	0.702746	0.232441	0.163399	0.000359177	0.000299348	0.702726			1.69324e+09	0.237524	0.16698	1.69324e+09	0.000264933	0.00022923	0.70272	1.69324e+09	0.238229	0.16745	1.69324e+09	0.000309846	0.000304863	0.702603	1.69324e+09	0.237339	0.166848	1.69324e+09	0.000317285	0.000300005	0.702712	1.69324e+09	0.232984	0.163732	1.69324e+09	0.000357883
	3	0.240935	0.169444	0.000268119	0.000273607	0.703003	0.240183	0.168895	0.000288581	0.000320941	0.702908	0.240233	0.168925	0.000332687	0.000324629	0.702894	0.237586	0.167065	0.000354724	0.000311347	0.702939			1.69324e+09	0.241059	0.169518	1.69324e+09	0.000267968	0.000274794	0.702946	1.69324e+09	0.240423	0.169042	1.69324e+09	0.000289	0.000319286	0.702811	1.69324e+09	0.24042	0.169039	1.69324e+09	0.000334083	0.000325156	0.70282	1.69324e+09	0.23799	0.167313	1.69324e+09	0.000355206
	4	0.240127	0.168769	0.000263246	0.000259465	0.702555	0.243307	0.171021	0.000321069	0.00026187	0.702617	0.241534	0.169812	0.000347541	0.000312034	0.70278	0.240969	0.169429	0.000370147	0.000343623	0.702879			1.69324e+09	0.239958	0.168663	1.69324e+09	0.000263825	0.00025902	0.702608	1.69324e+09	0.243502	0.171136	1.69324e+09	0.000321424	0.000260639	0.702521	1.69324e+09	0.241542	0.169818	1.69324e+09	0.000347737	0.000310022	0.702778	1.69324e+09	0.241124	0.169521	1.69324e+09	0.00036913
	5	0.237082	0.166664	0.000281285	0.000261936	0.702698	0.244311	0.171696	0.000296083	0.000291018	0.702494	0.240425	0.16908	0.00033714	0.0002719	0.70298	0.240848	0.1693	0.00033156	0.000310663	0.702697			1.69324e+09	0.236796	0.166488	1.69324e+09	0.000281816	0.0002618	0.702802	1.69324e+09	0.244377	0.171739	1.69324e+09	0.000293612	0.000290641	0.702478	1.69324e+09	0.240284	0.168995	1.69324e+09	0.000336083	0.000271134	0.703035	1.69324e+09	0.240937	0.169355	1.69324e+09	0.0003315
	6	0.236173	0.165961	0.0002706	0.000257292	0.702428	0.244219	0.171716	0.000286847	0.000255856	0.702839	0.239581	0.168452	0.000332896	0.000299827	0.702834	0.242196	0.170313	0.00036931	0.000340199	0.70297			1.69324e+09	0.236202	0.165979	1.69324e+09	0.000270484	0.000257773	0.702417	1.69324e+09	0.244014	0.171591	1.69324e+09	0.000286918	0.000255292	0.702913	1.69324e+09	0.23956	0.168439	1.69324e+09	0.00033364	0.000301062	0.702838	1.69324e+09	0.242333	0.170398	1.69324e+09	0.000371999
	7	0.237736	0.167125	0.000278641	0.00027456	0.702703	0.239636	0.168422	0.000297696	0.000276221	0.702538	0.23995	0.16874	0.000354087	0.000304263	0.702951	0.243964	0.171525	0.000392803	0.000316885	0.702842			1.69324e+09	0.237853	0.1672	1.69324e+09	0.000279158	0.000274814	0.702677	1.69324e+09	0.239449	0.168306	1.69324e+09	0.000299281	0.000277737	0.702595	1.69324e+09	0.239949	0.168739	1.69324e+09	0.00035508	0.000304758	0.702948	1.69324e+09	0.24402	0.171557	1.69324e+09	0.000391959
	8	0.238819	0.167938	0.000282361	0.000263961	0.702923	0.239956	0.168662	0.000322922	0.000295603	0.702602	0.239559	0.168433	0.000355492	0.000312808	0.702821	0.243482	0.171174	0.000350091	0.000286486	0.702792			1.69324e+09	0.239191	0.168166	1.69324e+09	0.00028115	0.000261777	0.702782	1.69324e+09	0.239924	0.168646	1.69324e+09	0.000324387	0.000298334	0.702622	1.69324e+09	0.239449	0.168358	1.69324e+09	0.00035612	0.000312918	0.702824	1.69324e+09	0.243407	0.171128	1.69324e+09	0.000347635
	9	0.242882	0.170752	0.000261871	0.000239756	0.702751	0.239194	0.168164	0.00031799	0.00031975	0.702756	0.238437	0.167539	0.000362785	0.00030602	0.702374	0.24293	0.17079	0.000358789	0.000310395	0.702807			1.69324e+09	0.243127	0.170901	1.69324e+09	0.000260923	0.000238218	0.702657	1.69324e+09	0.239146	0.168135	1.69324e+09	0.00031577	0.000318746	0.702773	1.69324e+09	0.23839	0.16751	1.69324e+09	0.000362209	0.000305639	0.702389	1.69324e+09	0.242967	0.170812	1.69324e+09	0.000358581
	10	0.243988	0.171565	0.000260765	0.00022365	0.702895	0.238865	0.16792	0.000272352	0.000267378	0.702703	0.238481	0.167671	0.000342371	0.000302834	0.702799	0.244382	0.171797	0.000345698	0.000277108	0.702754			1.69324e+09	0.244029	0.171589	1.69324e+09	0.000259809	0.000223957	0.702877	1.69324e+09	0.238874	0.167925	1.69324e+09	0.000272275	0.000265359	0.702692	1.69324e+09	0.238534	0.167709	1.69324e+09	0.000341951	0.000302798	0.7028	1.69324e+09	0.244454	0.171841	1.69324e+09	0.000345672
	11	0.243743	0.171344	0.00024008	0.000247824	0.702695	0.239403	0.168303	0.000316227	0.000262972	0.702724	0.23963	0.168527	0.00035322	0.000305067	0.703002	0.244684	0.172033	0.000358251	0.000272463	0.702853			1.69324e+09	0.243757	0.171347	1.69324e+09	0.000241529	0.000251483	0.70267	1.69324e+09	0.239485	0.168355	1.69324e+09	0.000317781	0.000265093	0.702697	1.69324e+09	0.239918	0.168702	1.69324e+09	0.000354345	0.000305024	0.702885	1.69324e+09	0.244653	0.172018	1.69324e+09	0.000359149
	12	0.24418	0.171624	0.000280837	0.000281973	0.702586	0.240002	0.168757	0.000293871	0.0003012	0.702863	0.242465	0.170457	0.000357943	0.000302149	0.702743	0.243965	0.171551	0.000358131	0.000295924	0.702945			1.69324e+09	0.244285	0.17169	1.69324e+09	0.000281111	0.000282593	0.702553	1.69324e+09	0.239986	0.168745	1.69324e+09	0.000294308	0.000301143	0.702853	1.69324e+09	0.242795	0.170654	1.69324e+09	0.000356289	0.000302826	0.702596	1.69324e+09	0.243939	0.171537	1.69324e+09	0.000357768
	13	0.246145	0.173077	0.000246327	0.00026405	0.70288	0.239052	0.167991	0.00032618	0.000261453	0.702449	0.247163	0.173707	0.000315561	0.000322812	0.702533	0.244127	0.171695	0.000349972	0.000315665	0.703071			1.69324e+09	0.246239	0.173135	1.69324e+09	0.000245961	0.000263216	0.702847	1.69324e+09	0.23919	0.168075	1.69324e+09	0.000325704	0.000261078	0.702391	1.69324e+09	0.247405	0.173854	1.69324e+09	0.000314406	0.000323258	0.702437	1.69324e+09	0.244013	0.171622	1.69324e+09	0.000349477
	14	0.246314	0.173141	0.000272513	0.00026012	0.702659	0.243145	0.17097	0.000283052	0.000291375	0.702878	0.247978	0.174309	0.000331641	0.00031382	0.702654	0.241539	0.169774	0.000346863	0.000290893	0.702648			1.69324e+09	0.246174	0.173056	1.69324e+09	0.000275741	0.000259939	0.702711	1.69324e+09	0.243683	0.171301	1.69324e+09	0.000281377	0.000291689	0.702682	1.69324e+09	0.247963	0.174304	1.69324e+09	0.000332297	0.000312745	0.702673	1.69324e+09	0.241053	0.169471	1.69324e+09	0.00034854
	15	0.244208	0.171717	0.000291028	0.000261162	0.702887	0.246501	0.173276	0.000302987	0.000266455	0.702664	0.24696	0.173629	0.000324647	0.000305662	0.702796	0.237401	0.166866	0.000373196	0.000326175	0.702648			1.69324e+09	0.244215	0.171721	1.69324e+09	0.000290564	0.000261172	0.702884	1.69324e+09	0.246717	0.173405	1.69324e+09	0.000303736	0.000266831	0.702565	1.69324e+09	0.24694	0.173619	1.69324e+09	0.000324505	0.00030653	0.702812	1.69324e+09	0.237142	0.166708	1.69324e+09	0.000373542
	16	0.246493	0.173268	0.000262708	0.000260358	0.702663	0.248056	0.174338	0.000300117	0.00030123	0.70254	0.247553	0.174078	0.000328413	0.000336568	0.702924	0.235644	0.165641	0.000354754	0.000345946	0.702686			1.69324e+09	0.24662	0.173345	1.69324e+09	0.000261839	0.000259	0.702613	1.69324e+09	0.248182	0.174415	1.69324e+09	0.000300142	0.000300471	0.70249	1.69324e+09	0.247587	0.1741	1.69324e+09	0.0003289	0.000335435	0.702917	1.69324e+09	0.23561	0.16562	1.69324e+09	0.00035435
	17	0.247307	0.173876	0.000272663	0.000228115	0.702808	0.24936	0.175294	0.000303554	0.000246537	0.7027	0.247666	0.174171	0.000335735	0.000275978	0.702983	0.236629	0.16632	0.00036399	0.000315099	0.702632			1.69324e+09	0.247355	0.173909	1.69324e+09	0.000271368	0.000227578	0.702805	1.69324e+09	0.249463	0.17536	1.69324e+09	0.000302739	0.000244683	0.702666	1.69324e+09	0.247582	0.174118	1.69324e+09	0.000335662	0.000271776	0.703001	1.69324e+09	0.23702	0.166559	1.69324e+09	0.00036487
	18	0.24716	0.173795	0.000244773	0.000251784	0.702896	0.249493	0.175387	0.00028882	0.000271665	0.702696	0.2464	0.173223	0.000327396	0.000269577	0.702746	0.241058	0.169458	0.000366949	0.000305661	0.702739			1.69324e+09			1.69324e+09				1.69324e+09			1.69324e+09				1.69324e+09			1.69324e+09				1.69324e+09			1.69324e+09
	Cup	C	H3	C	H3		C	H3	C	H3		C	H3	C	H3		C	H3	C	H3
	Info	tbdgy	tbdgy	tbdgy	tbdgy		tbdgy	tbdgy	tbdgy	tbdgy		tbdgy	tbdgy	tbdgy	tbdgy		tbdgy	tbdgy	tbdgy	tbdgy
	Mean	0.24213	0.170225	0.000268715	0.000255423		0.242412	0.170408	0.000302892	0.000281689		0.242262	0.17033	0.000337032	0.000303352		0.240217	0.168882	0.000359837	0.00030955			Mean		0.242149	0.17023		0.000268636	0.000255398			0.242165	0.170227		0.000302394	0.000282618			0.242229	0.1703		0.000339412	0.000305693			0.240853	0.169325		0.000358579
	StdErr (%)	0.380031	0.381207	1.30375	1.50353		0.368396	0.368063	1.23213	1.83653		0.372907	0.372262	1.08576	1.3585		0.424571	0.425927	0.886316	1.59333
		isotope ratio (blank corrected)		30/29				not-blank corr																isotope ratio (blank corrected)		30/29				not-blank corr
		1		0.702754				0.70303																1		0.702723				0.702999
		2		0.702684				0.702968																2		0.702647				0.702936
		3		0.70281				0.703085																3		0.702779				0.703056
		4		0.702804				0.70304																4		0.702779				0.703021
		average		0.702763	V/V			0.703031																average		0.702732	V/V			0.703003	V/V
				4.16312e-05				3.42989e-05																		4.4421e-05				3.58227e-05
			S1	7.21074e-05	urel			5.94074e-05																	S1	7.69394e-05	urel			6.20467e-05
[truncated: 2 more columns]

## Sheet: raw data 2 seq
	raw data: sample and IDMS measurement																							tau-corrected data ->>
	sample: Si28-33Pr11 Part N.2.1																							tau correction
	Sequence 2	no rotation	10^13 Ohm																							tau constant
																								cup	C	0.6061
		sample (x, Si28)																						cup	H3	0.5266
		Si28_01		bl_01		30Si/29Si-corr_01	Si28_02		bl_02		30Si/29Si-corr_02	Si28_03		bl_03		30Si/29Si-corr_03	Si28_04		bl_04		30Si/29Si-corr_04			Si28_01			bl_01			30Si/29Si-corr_01	Si28_02			bl_02			30Si/29Si-corr_02	Si28_03			bl_03			30Si/29Si-corr_03	Si28_04			bl_04
	Cycle	29.0775	30.09	29.0775	30.09		29.0775	30.09	29.0775	30.09		29.0775	30.09	29.0775	30.09		29.0775	30.09	29.0775	30.09				time	29.078	30.09	Time	29.078	30.09		time	29.078	30.09	time	29.078	30.09		time	29.078	30.09	time	29.078	30.09		time	29.078	30.09	time	29.078
	1	0.101796	0.00134243	9.94357e-05	0.000117243	0.0120308	0.106254	0.00135697	0.000117322	0.000136532	0.0116569	0.11361	0.00139849	7.5691e-05	0.000116711	0.011328	0.112105	0.00135174	7.67045e-05	0.000112175	0.0110883			1.69338e+09			1.69338e+09				1.69338e+09			1.69338e+09				1.69338e+09			1.69338e+09				1.69338e+09			1.69338e+09
	2	0.101741	0.00133891	9.72293e-05	0.000121053	0.0120027	0.107388	0.00136412	0.000112445	0.000132945	0.0116004	0.112139	0.00137507	8.21599e-05	0.000114726	0.0112678	0.112602	0.00135976	6.94702e-05	0.000108775	0.0111106			1.69338e+09	0.101755	0.00133892	1.69338e+09	9.71151e-05	0.000120995	0.0119988	1.69338e+09	0.107441	0.00136444	1.69338e+09	0.000111548	0.000132374	0.0116049	1.69338e+09	0.112099	0.00137455	1.69338e+09	8.20883e-05	0.000114535	0.0112703	1.69338e+09	0.112603	0.00135983	1.69338e+09	6.94674e-05
	3	0.102184	0.00134291	9.62746e-05	0.000115394	0.0119899	0.107737	0.0013672	9.24971e-05	0.000118323	0.0115914	0.112485	0.00138194	7.37098e-05	0.000110643	0.0112942	0.11215	0.00135395	7.66278e-05	0.000111162	0.0111036			1.69338e+09	0.102225	0.00134312	1.69338e+09	9.6226e-05	0.000115301	0.0119847	1.69338e+09	0.10771	0.00136677	1.69338e+09	9.20024e-05	0.000118113	0.0115976	1.69338e+09	0.112545	0.00138242	1.69338e+09	7.36269e-05	0.000110614	0.0112955	1.69338e+09	0.112115	0.00135359	1.69338e+09	7.65748e-05
	4	0.103736	0.00135065	9.49348e-05	0.000115989	0.011885	0.106105	0.00134063	8.90949e-05	0.000121553	0.0115191	0.114983	0.00140119	7.82502e-05	0.000113137	0.0112162	0.110877	0.0013391	6.69673e-05	0.000106716	0.0110971			1.69338e+09	0.103732	0.00135046	1.69338e+09	9.50697e-05	0.000116064	0.0118813	1.69338e+09	0.106083	0.00134026	1.69338e+09	8.90496e-05	0.000121548	0.0115255	1.69338e+09	0.115016	0.00140145	1.69338e+09	7.83541e-05	0.000113145	0.0112183	1.69338e+09	0.110885	0.00133929	1.69338e+09	6.6826e-05
	5	0.101968	0.00133224	0.000102644	0.000119466	0.0119105	0.106686	0.00134709	9.03591e-05	0.000118018	0.011517	0.114044	0.00139621	7.86147e-05	0.000111086	0.011265	0.112501	0.0013643	6.99554e-05	0.000109902	0.0111609			1.69338e+09	0.101875	0.00133125	1.69338e+09	0.000102777	0.000119737	0.0119093	1.69338e+09	0.106602	0.00134642	1.69338e+09	9.04537e-05	0.000117931	0.0115272	1.69338e+09	0.113881	0.00139481	1.69338e+09	7.85679e-05	0.000110916	0.0112719	1.69338e+09	0.112524	0.00136447	1.69338e+09	7.02775e-05
	6	0.101158	0.00131909	9.86229e-05	0.000124613	0.0118758	0.103779	0.00131921	9.17135e-05	0.000118792	0.0115711	0.110467	0.00135648	7.69559e-05	0.000107711	0.01127	0.111508	0.00134484	7.58864e-05	0.000111996	0.0110857			1.69338e+09	0.101052	0.00131803	1.69338e+09	9.87671e-05	0.000124612	0.0118754	1.69338e+09	0.103606	0.00131771	1.69338e+09	9.16956e-05	0.000118871	0.0115835	1.69338e+09	0.11042	0.00135593	1.69338e+09	7.69746e-05	0.000107721	0.0112731	1.69338e+09	0.111394	0.00134357	1.69338e+09	7.59302e-05
	7	0.0969584	0.00127476	0.00010945	0.000119379	0.0119331	0.0985246	0.00126558	8.95122e-05	0.000122268	0.0116438	0.1118	0.00136669	7.95292e-05	0.000111664	0.011227	0.107125	0.00129526	7.2092e-05	0.000108487	0.0110765			1.69338e+09	0.0969633	0.00127484	1.69338e+09	0.00010959	0.000119286	0.0119308	1.69338e+09	0.0984899	0.00126523	1.69338e+09	8.94091e-05	0.000122261	0.0116524	1.69338e+09	0.111789	0.00136651	1.69338e+09	7.95235e-05	0.000111784	0.0112295	1.69338e+09	0.107078	0.00129475	1.69338e+09	7.21373e-05
	8	0.10139	0.00132359	0.000105234	0.000119542	0.0118931	0.102142	0.00130042	8.68448e-05	0.000118405	0.0115725	0.109975	0.00134661	7.66773e-05	0.000114503	0.0112307	0.109297	0.0013172	7.80966e-05	0.000114558	0.0110571			1.69338e+09	0.101618	0.00132546	1.69338e+09	0.000104952	0.00011964	0.0118824	1.69338e+09	0.102404	0.00130243	1.69338e+09	8.69173e-05	0.000118186	0.0115702	1.69338e+09	0.109998	0.00134666	1.69338e+09	7.64995e-05	0.000114486	0.011232	1.69338e+09	0.109476	0.00131871	1.69338e+09	7.7986e-05
	9	0.103266	0.00133428	0.000101641	0.000122502	0.0117805	0.105762	0.00132934	9.15201e-05	0.000115304	0.0114497	0.112453	0.00136836	7.46048e-05	0.000111145	0.0111766	0.112075	0.00134349	6.90304e-05	0.000107474	0.0110176			1.69338e+09	0.10326	0.00133406	1.69338e+09	0.000101487	0.000122445	0.0117765	1.69338e+09	0.105861	0.00133011	1.69338e+09	9.14636e-05	0.000115238	0.0114538	1.69338e+09	0.112532	0.00136946	1.69338e+09	7.46096e-05	0.000111125	0.0111817	1.69338e+09	0.11211	0.00134375	1.69338e+09	6.89401e-05
	10	0.101133	0.00131127	9.76751e-05	0.000116343	0.0118014	0.106983	0.00134403	8.40853e-05	0.000114694	0.0114563	0.113846	0.00140874	7.69048e-05	0.000113426	0.0113947	0.110928	0.00133131	7.38352e-05	0.000106708	0.0110217			1.69338e+09	0.101081	0.00131078	1.69338e+09	9.75848e-05	0.000116343	0.0118002	1.69338e+09	0.107018	0.00134439	1.69338e+09	8.40764e-05	0.000114744	0.0114633	1.69338e+09	0.113913	0.00140942	1.69338e+09	7.69462e-05	0.000113435	0.011397	1.69338e+09	0.110895	0.00133107	1.69338e+09	7.39891e-05
	11	0.100821	0.001308	9.72309e-05	0.00012248	0.0118055	0.107438	0.00134936	9.10865e-05	0.000118075	0.0114574	0.115719	0.00140637	7.65599e-05	0.000111624	0.0111896	0.110502	0.00133075	7.62917e-05	0.000111499	0.0110592			1.69338e+09	0.100816	0.00130791	1.69338e+09	9.74061e-05	0.000122457	0.0118027	1.69338e+09	0.107491	0.00134994	1.69338e+09	9.12404e-05	0.000118009	0.0114645	1.69338e+09	0.115751	0.00140583	1.69338e+09	7.67518e-05	0.000111494	0.0111849	1.69338e+09	0.110569	0.00133267	1.69338e+09	7.64048e-05
	12	0.100999	0.00130853	0.000102528	0.000115614	0.01179	0.108436	0.0013625	8.83452e-05	0.000112605	0.0114732	0.11473	0.00139152	8.22178e-05	0.000109291	0.0111566	0.112779	0.00139241	7.69668e-05	0.000107303	0.0113828			1.69338e+09	0.101048	0.00130893	1.69338e+09	0.000102571	0.000115606	0.0117856	1.69338e+09	0.108424	0.00136229	1.69338e+09	8.82753e-05	0.000112685	0.0114798	1.69338e+09	0.114636	0.00139051	1.69338e+09	8.22123e-05	0.000109299	0.01116	1.69338e+09	0.11279	0.00139242	1.69338e+09	7.69352e-05
	13	0.103244	0.00133033	9.92567e-05	0.000122027	0.0117447	0.106837	0.00133782	8.77894e-05	0.000122445	0.0114138	0.111265	0.0013515	7.62976e-05	0.000112055	0.0111443	0.111036	0.00133134	7.48001e-05	0.000108224	0.0110113			1.69338e+09	0.103303	0.00133078	1.69338e+09	9.91939e-05	0.000122099	0.0117398	1.69338e+09	0.106779	0.00133706	1.69338e+09	8.77858e-05	0.000122568	0.0114203	1.69338e+09	0.111202	0.00135085	1.69338e+09	7.6228e-05	0.000112118	0.011148	1.69338e+09	0.110964	0.00132991	1.69338e+09	7.47328e-05
	14	0.103908	0.00133369	9.95658e-05	0.000119495	0.0117018	0.105685	0.00132169	8.8176e-05	0.000119264	0.0113856	0.111742	0.00135631	7.893e-05	0.000112682	0.0111399	0.109281	0.00131159	7.37926e-05	0.000109874	0.0110074			1.69338e+09	0.10403	0.00133478	1.69338e+09	9.95334e-05	0.000119375	0.0116963	1.69338e+09	0.105685	0.00132145	1.69338e+09	8.81504e-05	0.000119116	0.0113908	1.69338e+09	0.111818	0.00135708	1.69338e+09	7.90039e-05	0.000112665	0.0111422	1.69338e+09	0.109258	0.00131101	1.69338e+09	7.39867e-05
	15	0.106599	0.00136507	9.83593e-05	0.000118217	0.0117009	0.106837	0.00133009	8.70796e-05	0.000117735	0.0113415	0.113379	0.00137579	7.8345e-05	0.000111517	0.0111508	0.110383	0.00131266	8.01743e-05	0.000110059	0.0109071			1.69338e+09	0.106645	0.00136549	1.69338e+09	9.82938e-05	0.000118147	0.0116975	1.69338e+09	0.10686	0.0013303	1.69338e+09	8.71062e-05	0.0001176	0.0113483	1.69338e+09	0.113407	0.00137593	1.69338e+09	7.84252e-05	0.000111485	0.0111524	1.69338e+09	0.110418	0.00131289	1.69338e+09	8.01194e-05
	16	0.106069	0.00135687	9.6473e-05	0.00011565	0.011682	0.106792	0.00133316	8.94333e-05	0.00011162	0.011375	0.113101	0.00136414	8.28486e-05	0.000110883	0.0110752	0.110915	0.00132371	7.12029e-05	0.000109616	0.0109545			1.69338e+09	0.106052	0.00135669	1.69338e+09	9.6427e-05	0.000115667	0.0116798	1.69338e+09	0.106815	0.00133339	1.69338e+09	8.94697e-05	0.000111614	0.011382	1.69338e+09	0.11309	0.00136398	1.69338e+09	8.28382e-05	0.000110977	0.0110779	1.69338e+09	0.110896	0.00132353	1.69338e+09	7.10316e-05
	17	0.105801	0.00135521	9.61909e-05	0.000119119	0.0116959	0.107911	0.00134231	8.87983e-05	0.000117381	0.0113418	0.11284	0.00136652	7.78389e-05	0.000116797	0.0111219	0.109512	0.00130237	7.20903e-05	0.000106542	0.0108999			1.69338e+09	0.105634	0.00135363	1.69338e+09	9.6431e-05	0.000119154	0.0116972	1.69338e+09	0.107928	0.00134244	1.69338e+09	8.87982e-05	0.000117458	0.0113486	1.69338e+09	0.112692	0.00136529	1.69338e+09	7.77121e-05	0.000116877	0.0111287	1.69338e+09	0.109387	0.00130117	1.69338e+09	7.23935e-05
	18	0.101433	0.00130676	0.000103123	0.000116749	0.0117219	0.107255	0.00133731	8.94294e-05	0.000114101	0.0113645	0.109006	0.00132494	7.93379e-05	0.000113432	0.0111316	0.107444	0.00128529	7.96002e-05	0.000110104	0.0109507			1.69338e+09			1.69338e+09				1.69338e+09			1.69338e+09				1.69338e+09			1.69338e+09				1.69338e+09			1.69338e+09
	Cup	C	H3	C	H3		C	H3	C	H3		C	H3	C	H3		C	H3	C	H3
	Info	tbdgy	tbdgy	tbdgy	tbdgy		tbdgy	tbdgy	tbdgy	tbdgy		tbdgy	tbdgy	tbdgy	tbdgy		tbdgy	tbdgy	tbdgy	tbdgy
	Mean	0.102456	0.0013297	9.97705e-05	0.000118938		0.106031	0.00133605	9.1974e-05	0.000119448		0.112644	0.00137427	7.80818e-05	0.000112391		0.110723	0.00133284	7.4088e-05	0.00010951			Mean		0.102568	0.00133032		9.9589e-05	0.000119183			0.10595	0.00133466		9.04651e-05	0.000118645			0.112799	0.00137567		7.81476e-05	0.000112042			0.110835	0.00133454		7.36083e-05
	StdErr (%)	0.524387	0.396298	0.877329	0.549452		0.53251	0.430804	2.20672	1.25333		0.370339	0.394245	0.76204	0.490182		0.353764	0.472966	1.20728	0.475939
		isotope ratio (blank corrected)		30/29				not-blank corr																isotope ratio (blank corrected)		30/29				not-blank corr
		1		0.0118303				0.0129783																1		0.0118211				0.0129701
		2		0.0114851				0.0126006																2		0.0114883				0.0125972
		3		0.01121				0.0122002																3		0.0112102				0.0121957
		4		0.0110551		29/30		0.0120375																4		0.0110612				0.0120408
		average		0.0113951	V/V	87.7569		0.0124541																average		0.0113952	V/V			0.0124509	V/V
				0.0149304				0.0169416																		0.0146814				0.0167887
			S1	0.0258603	urel			0.0293438																	S1	0.0254289	urel			0.0290789
		IDMS blend (bx)
		idms_01		bl_05		30Si/29Si-corr_01	idms_02		bl_06		30Si/29Si-corr_02	idms_03		bl_07		30Si/29Si-corr_03	idms_04		bl_08		30Si/29Si-corr_04			idms_01			bl_05			30Si/29Si-corr_01	idms_02			bl_06			30Si/29Si-corr_02	idms_03			bl_07			30Si/29Si-corr_03	idms_04			bl_08
	Cycle	29.0775	30.09	29.0775	30.09		29.0775	30.09	29.0775	30.09		29.0775	30.09	29.0775	30.09		29.0775	30.09	29.0775	30.09				time	29.078	30.09	time	29.078	30.09		time	29.078	30.09	time	29.078	30.09		time	29.078	30.09	time	29.078	30.09		time	29.078	30.09	time	29.078
	1	0.0428773	0.163552	6.81491e-05	0.000117317	3.81775	0.044204	0.168749	7.91553e-05	0.000116679	3.82106	0.0459966	0.175605	7.4761e-05	0.0001192	3.82153	0.0433672	0.165495	7.10576e-05	0.000123416	3.81975			1.69339e+09			1.69338e+09				1.69339e+09			1.69339e+09				1.69339e+09			1.69339e+09				1.69339e+09			1.69339e+09
	2	0.0424077	0.161871	6.41924e-05	0.00011152	3.8204	0.0431363	0.164699	6.6823e-05	0.000115057	3.82173	0.046058	0.175847	7.4441e-05	0.000118318	3.82168	0.0444377	0.169629	7.03234e-05	0.00012002	3.82075			1.69339e+09	0.0424426	0.161992	1.69338e+09	6.41586e-05	0.000111257	3.82008	1.69339e+09	0.04314	0.164711	1.69339e+09	6.64177e-05	0.000115027	3.82169	1.69339e+09	0.0460339	0.175765	1.69339e+09	7.4362e-05	0.000118274	3.8219	1.69339e+09	0.0444731	0.169746	1.69339e+09	7.03303e-05
	3	0.0438456	0.167404	6.72114e-05	0.000108912	3.82131	0.0443066	0.169152	6.79334e-05	0.000115714	3.82129	0.0453281	0.172993	7.25751e-05	0.000117798	3.82024	0.0443465	0.169253	7.12468e-05	0.000122079	3.82014			1.69339e+09	0.0438332	0.167361	1.69338e+09	6.7262e-05	0.000108865	3.82139	1.69339e+09	0.0443006	0.16913	1.69339e+09	6.80847e-05	0.000115723	3.82131	1.69339e+09	0.045294	0.172878	1.69339e+09	7.27299e-05	0.000117869	3.8206	1.69339e+09	0.0443295	0.169198	1.69339e+09	7.12613e-05
	4	0.0418203	0.159502	6.65805e-05	0.000109002	3.81741	0.0428515	0.163497	7.39656e-05	0.000115567	3.81907	0.0444481	0.169654	8.17454e-05	0.000122172	3.82077	0.0436076	0.166518	7.10081e-05	0.000120924	3.82216			1.69339e+09	0.0417758	0.159354	1.69338e+09	6.65969e-05	0.000109093	3.81792	1.69339e+09	0.0428316	0.163431	1.69339e+09	7.40529e-05	0.000115619	3.8193	1.69339e+09	0.0444107	0.16953	1.69339e+09	8.18486e-05	0.000122179	3.82119	1.69339e+09	0.0436125	0.166534	1.69339e+09	7.11763e-05
	5	0.0417425	0.159362	6.79875e-05	0.000113862	3.82117	0.0433673	0.165588	7.2053e-05	0.000118535	3.82188	0.043564	0.166251	7.74454e-05	0.000118157	3.8202	0.0445861	0.17016	7.91851e-05	0.000121199	3.81995			1.69339e+09	0.0417783	0.159485	1.69338e+09	6.80092e-05	0.000113875	3.82082	1.69339e+09	0.0434254	0.165781	1.69339e+09	7.18323e-05	0.000118565	3.8212	1.69339e+09	0.0435534	0.166218	1.69339e+09	7.7323e-05	0.000118131	3.82038	1.69339e+09	0.0446479	0.170363	1.69339e+09	7.90516e-05
	6	0.0428108	0.163408	6.71828e-05	0.000109421	3.82033	0.044462	0.169663	6.78558e-05	0.000116522	3.81943	0.0441539	0.168607	7.83539e-05	0.000121339	3.82251	0.0453198	0.173008	6.73089e-05	0.000122048	3.82096			1.69339e+09	0.0428685	0.163597	1.69338e+09	6.71576e-05	0.000109334	3.81957	1.69339e+09	0.0444994	0.169785	1.69339e+09	6.79327e-05	0.000116485	3.81895	1.69339e+09	0.0442045	0.168776	1.69339e+09	7.84549e-05	0.000121424	3.82198	1.69339e+09	0.045346	0.173097	1.69339e+09	6.71591e-05
	7	0.0445609	0.169966	6.68004e-05	0.000109114	3.81746	0.0451948	0.172419	7.58073e-05	0.000116496	3.81848	0.0460356	0.175805	8.22103e-05	0.00012279	3.82263	0.0458235	0.174968	7.21145e-05	0.000119726	3.82174			1.69339e+09	0.0445969	0.170084	1.69338e+09	6.67441e-05	0.000109195	3.81701	1.69339e+09	0.0452084	0.172466	1.69339e+09	7.58727e-05	0.000116462	3.81836	1.69339e+09	0.0460773	0.175942	1.69339e+09	8.21385e-05	0.000122746	3.82216	1.69339e+09	0.0458296	0.174988	1.69339e+09	7.22196e-05
	8	0.0445681	0.170044	6.45223e-05	0.000113797	3.81859	0.0451238	0.172287	7.10531e-05	0.00011463	3.82158	0.0461902	0.176332	7.49625e-05	0.00011891	3.82124	0.045608	0.174092	7.22702e-05	0.000119274	3.82057			1.69339e+09	0.0445718	0.170061	1.69338e+09	6.44067e-05	0.000113861	3.81864	1.69339e+09	0.0451231	0.172288	1.69339e+09	7.08628e-05	0.000114524	3.82163	1.69339e+09	0.0462063	0.176383	1.69339e+09	7.46575e-05	0.000118795	3.82102	1.69339e+09	0.0455318	0.173837	1.69339e+09	7.23755e-05
	9	0.0446646	0.170515	6.35993e-05	0.000111174	3.82088	0.0451746	0.172426	7.05383e-05	0.000113129	3.82034	0.0464836	0.17745	7.37658e-05	0.000119142	3.82118	0.043713	0.166841	7.50306e-05	0.000120727	3.82031			1.69339e+09	0.0446545	0.170482	1.69338e+09	6.36503e-05	0.000111163	3.82099	1.69339e+09	0.0451841	0.172456	1.69339e+09	7.05221e-05	0.0001131	3.82019	1.69339e+09	0.0464421	0.177311	1.69339e+09	7.37735e-05	0.000119023	3.82161	1.69339e+09	0.0436752	0.166716	1.69339e+09	7.51321e-05
	10	0.0440945	0.168256	6.70121e-05	0.000113165	3.81905	0.0455738	0.173932	7.02881e-05	0.000113034	3.81991	0.0441619	0.168522	7.53228e-05	0.000112437	3.8199	0.0438217	0.167308	7.72282e-05	0.000119932	3.8215			1.69339e+09	0.0440742	0.168188	1.69338e+09	6.70761e-05	0.000113235	3.81926	1.69339e+09	0.0455811	0.173954	1.69339e+09	7.03378e-05	0.000113013	3.8198	1.69339e+09	0.0441249	0.168398	1.69339e+09	7.53706e-05	0.000112366	3.82028	1.69339e+09	0.0438566	0.167425	1.69339e+09	7.7166e-05
	11	0.043709	0.166848	6.67225e-05	0.00011509	3.82052	0.0455155	0.173669	7.28849e-05	0.000111994	3.81905	0.0446782	0.170473	7.60234e-05	0.00011526	3.81942	0.045361	0.173235	7.19937e-05	0.000116445	3.82249			1.69339e+09	0.0436838	0.166763	1.69338e+09	6.6782e-05	0.000115123	3.82078	1.69339e+09	0.0454518	0.173457	1.69339e+09	7.30247e-05	0.000112205	3.81973	1.69339e+09	0.0447115	0.170587	1.69339e+09	7.60671e-05	0.000115598	3.81912	1.69339e+09	0.0454369	0.173483	1.69339e+09	7.1738e-05
	12	0.0433975	0.165577	6.86585e-05	0.000114223	3.81866	0.0438092	0.167174	7.41616e-05	0.000119743	3.81952	0.0450829	0.172145	7.65316e-05	0.000123202	3.82222	0.0459238	0.175222	7.01481e-05	0.00011921	3.81892			1.69339e+09	0.043362	0.165459	1.69338e+09	6.87104e-05	0.000114256	3.81905	1.69339e+09	0.0437899	0.167101	1.69339e+09	7.41325e-05	0.000119865	3.81954	1.69339e+09	0.0451323	0.17231	1.69339e+09	7.65269e-05	0.000123262	3.82169	1.69339e+09	0.0459471	0.175299	1.69339e+09	7.0198e-05
	13	0.042031	0.160425	6.9174e-05	0.000116901	3.82022	0.0445707	0.169588	7.14615e-05	0.000118628	3.80841	0.0470124	0.179441	7.57955e-05	0.000118671	3.82056	0.0464975	0.177539	7.43509e-05	0.000120853	3.82161			1.69339e+09	0.0420137	0.160367	1.69338e+09	6.925e-05	0.000116834	3.82042	1.69339e+09	0.0445549	0.169525	1.69339e+09	7.13684e-05	0.000118497	3.80835	1.69339e+09	0.0470617	0.179604	1.69339e+09	7.57717e-05	0.000118527	3.82	1.69339e+09	0.0465108	0.177586	1.69339e+09	7.44511e-05
	14	0.0425785	0.162463	7.22463e-05	0.000110582	3.81898	0.0430376	0.16366	6.96144e-05	0.000112628	3.80634	0.0474117	0.180962	7.53665e-05	0.000115093	3.82044	0.0465748	0.177876	7.48771e-05	0.000119616	3.82252			1.69339e+09	0.0425953	0.162518	1.69338e+09	7.20532e-05	0.000110318	3.81876	1.69339e+09	0.0430046	0.163566	1.69339e+09	6.94319e-05	0.000112454	3.80706	1.69339e+09	0.0474174	0.180981	1.69339e+09	7.52016e-05	0.00011507	3.8204	1.69339e+09	0.0465868	0.177915	1.69339e+09	7.49039e-05
	15	0.0424957	0.16218	6.38259e-05	0.000108481	3.81975	0.043656	0.166574	6.64091e-05	0.00011309	3.81919	0.0471697	0.180063	7.12291e-05	0.000117956	3.82099	0.0468277	0.178763	7.50914e-05	0.000119912	3.82081			1.69339e+09	0.0425432	0.162339	1.69338e+09	6.36593e-05	0.000108513	3.81921	1.69339e+09	0.0437004	0.166731	1.69339e+09	6.6552e-05	0.000113112	3.8189	1.69339e+09	0.0471559	0.180017	1.69339e+09	7.1263e-05	0.000117935	3.82114	1.69339e+09	0.0468268	0.178756	1.69339e+09	7.50652e-05
	16	0.044818	0.171105	6.41096e-05	0.000112401	3.82096	0.0451345	0.172198	7.63613e-05	0.000113804	3.8187	0.0467612	0.178469	7.69644e-05	0.000113955	3.82029	0.0465332	0.177515	7.35951e-05	0.000116749	3.81816			1.69339e+09	0.0448793	0.171307	1.69338e+09	6.4165e-05	0.000112482	3.82024	1.69339e+09	0.0451653	0.1723	1.69339e+09	7.64665e-05	0.000113907	3.81833	1.69339e+09	0.0467553	0.178449	1.69339e+09	7.70086e-05	0.000113951	3.82035	1.69339e+09	0.0465065	0.177425	1.69339e+09	7.3411e-05
	17	0.0453883	0.17318	6.65326e-05	0.000113035	3.81867	0.045113	0.17209	7.1373e-05	0.000118675	3.81811	0.046889	0.178984	7.33156e-05	0.00011774	3.82084	0.0455636	0.173884	6.60974e-05	0.000113193	3.81973			1.69339e+09	0.0453952	0.173199	1.69338e+09	6.67354e-05	0.000113091	3.81849	1.69339e+09	0.0450891	0.172013	1.69339e+09	7.09254e-05	0.00011868	3.81842	1.69339e+09	0.0468959	0.179005	1.69339e+09	7.32758e-05	0.000117734	3.82075	1.69339e+09	0.0455717	0.173915	1.69339e+09	6.59924e-05
	18	0.0450096	0.17171	6.97243e-05	0.000114188	3.81814	0.0444717	0.169743	6.39656e-05	0.00011396	3.8204	0.0469499	0.179168	7.58601e-05	0.000113765	3.8198	0.0467571	0.178525	7.06899e-05	0.000121704	3.82148			1.69339e+09			1.69338e+09				1.69339e+09			1.69339e+09				1.69339e+09			1.69339e+09				1.69339e+09			1.69339e+09
	Cup	C	H3	C	H3		C	H3	C	H3		C	H3	C	H3		C	H3	C	H3
	Info	tbdgy	tbdgy	tbdgy	tbdgy		tbdgy	tbdgy	tbdgy	tbdgy		tbdgy	tbdgy	tbdgy	tbdgy		tbdgy	tbdgy	tbdgy	tbdgy
	Mean	0.04349	0.165965	6.69018e-05	0.000112344		0.0443724	0.169284	7.12058e-05	0.000115438		0.0457986	0.174821	7.59261e-05	0.000118106		0.0452594	0.172768	7.24232e-05	0.000119835			Mean		0.0434418	0.165785		6.6651e-05	0.000111906			0.0443781	0.169293		7.11136e-05	0.000115452			0.0457173	0.17451		7.59858e-05	0.000118305			0.045293	0.172893		7.2602e-05
	StdErr (%)	0.640064	0.639634	0.806792	0.574655		0.470144	0.475506	1.27279	0.482014		0.616216	0.616766	0.868226	0.619516		0.609761	0.610588	1.05357	0.470014
		isotope ratio (blank corrected)		30/29				not-blank corr																isotope ratio (blank corrected)		30/29				not-blank corr
		1		3.81946				3.81616																1		3.81954				3.81625
		2		3.81858				3.81507																2		3.8183				3.8148
		3		3.82091				3.81716																3		3.82091				3.81715
		4		3.82075				3.81729																4		3.82069				3.8172
		average		3.81993	V/V			3.81642																average		3.81986	V/V			3.81635	V/V
				0.000144985				0.000135002																		0.000157406				0.000147199
			S1	0.000251122	urel			0.000233831																	S1	0.000272635	urel			0.000254956
		material w (WASO04)				material: WASO04 41963/04/72-75 part Mi 2.08
		waso_01		bl_09		30Si/29Si-corr_01	waso_02		bl_10		30Si/29Si-corr_02	waso_03		bl_11		30Si/29Si-corr_03	waso_04		bl_12		30Si/29Si-corr_04			waso_01			bl_09			30Si/29Si-corr_01	waso_02			bl_10			30Si/29Si-corr_02	waso_03			bl_11			30Si/29Si-corr_03	waso_04			bl_12
	Cycle	29.0775	30.09	29.0775	30.09		29.0775	30.09	29.0775	30.09		29.0775	30.09	29.0775	30.09		29.0775	30.09	29.0775	30.09				time	29.078	30.09	time	29.078	30.09		time	29.078	30.09	time	29.078	30.09		time	29.078	30.09	time	29.078	30.09		time	29.078	30.09	time	29.078
	1	0.145322	0.102618	8.02821e-05	0.000127755	0.705664	0.14647	0.103427	9.04918e-05	0.000132552	0.705681	0.139841	0.0987414	9.24156e-05	0.000129747	0.705601	0.148358	0.10461	9.68771e-05	0.000133856	0.704701			1.69339e+09			1.69339e+09				1.69339e+09			1.69339e+09				1.69339e+09			1.69339e+09				1.69339e+09			1.69339e+09
	2	0.147417	0.104077	8.49564e-05	0.000128107	0.70553	0.146663	0.103551	8.73674e-05	0.000132916	0.705595	0.138344	0.0976546	9.69102e-05	0.000131544	0.705384	0.074442	0.0523861	9.7256e-05	0.000134479	0.702881			1.69339e+09	0.147496	0.104125	1.69339e+09	8.49619e-05	0.000128038	0.705474	1.69339e+09	0.146648	0.10354	1.69339e+09	8.72271e-05	0.00013267	0.705602	1.69339e+09	0.1383	0.0976274	1.69339e+09	9.67737e-05	0.000131535	0.705411	1.69339e+09	0.073481	0.0518101	1.69339e+09	9.74181e-05
	3	0.147511	0.104136	8.04355e-05	0.000125545	0.705483	0.146041	0.103103	8.6607e-05	0.000124707	0.705536	0.138647	0.0978736	8.86364e-05	0.000129469	0.705421	0.121745	0.0862507	0.000101365	0.000132634	0.707948			1.69339e+09	0.147514	0.104138	1.69339e+09	8.02352e-05	0.000125461	0.705479	1.69339e+09	0.145903	0.103019	1.69339e+09	8.65735e-05	0.000124634	0.705631	1.69339e+09	0.138758	0.0979424	1.69339e+09	8.85585e-05	0.000129498	0.705354	1.69339e+09	0.123287	0.0872003	1.69339e+09	0.00010144
	4	0.14756	0.104164	7.55048e-05	0.000123589	0.705434	0.140114	0.0989685	8.57899e-05	0.000128943	0.705872	0.143604	0.101395	9.3235e-05	0.000133097	0.705589	0.147234	0.103978	0.000100899	0.00013415	0.705789			1.69339e+09	0.14752	0.104139	1.69339e+09	7.54331e-05	0.000123502	0.70546	1.69339e+09	0.140087	0.0989524	1.69339e+09	8.58069e-05	0.000129035	0.705898	1.69339e+09	0.14373	0.101472	1.69339e+09	9.33653e-05	0.000133066	0.705514	1.69339e+09	0.147755	0.104293	1.69339e+09	0.000100789
	5	0.145583	0.102796	7.70479e-05	0.000120815	0.705615	0.14474	0.102231	8.74067e-05	0.000129717	0.705856	0.144566	0.102066	9.47838e-05	0.000127827	0.705533	0.14637	0.103349	9.59761e-05	0.000133698	0.705658			1.69339e+09	0.145443	0.10271	1.69339e+09	7.70977e-05	0.000120887	0.705708	1.69339e+09	0.144991	0.102384	1.69339e+09	8.73193e-05	0.000129606	0.70569	1.69339e+09	0.144576	0.102072	1.69339e+09	9.47796e-05	0.000127741	0.705528	1.69339e+09	0.146238	0.103268	1.69339e+09	9.58802e-05
	6	0.143668	0.101438	7.68847e-05	0.00012586	0.705574	0.147068	0.103841	8.33708e-05	0.000125418	0.705628	0.143883	0.101584	9.31191e-05	0.000130364	0.705532	0.14358	0.101383	9.82455e-05	0.000130881	0.705674			1.69339e+09	0.143753	0.101491	1.69339e+09	7.68399e-05	0.00012593	0.705519	1.69339e+09	0.147115	0.10387	1.69339e+09	8.33273e-05	0.000125318	0.705598	1.69339e+09	0.143858	0.101568	1.69339e+09	9.32476e-05	0.00013035	0.705554	1.69339e+09	0.143558	0.101369	1.69339e+09	9.82876e-05
	7	0.149585	0.10563	7.4862e-05	0.000124751	0.705688	0.147038	0.103834	8.5282e-05	0.000124057	0.705723	0.143347	0.101211	0.000100847	0.000127076	0.705573	0.145265	0.102588	9.79638e-05	0.000129665	0.70579			1.69339e+09	0.149702	0.105702	1.69339e+09	7.48162e-05	0.000124608	0.705612	1.69339e+09	0.147077	0.103858	1.69339e+09	8.53031e-05	0.00012399	0.705703	1.69339e+09	0.143353	0.101215	1.69339e+09	0.000100819	0.000127137	0.705575	1.69339e+09	0.14533	0.102628	1.69339e+09	9.79835e-05
	8	0.1492	0.105322	7.46479e-05	0.000117808	0.705442	0.148977	0.105214	8.44007e-05	0.000121662	0.705805	0.144196	0.101822	9.18005e-05	0.000133704	0.705657	0.146763	0.103633	9.91741e-05	0.000135451	0.705702			1.69339e+09	0.149206	0.105325	1.69339e+09	7.50365e-05	0.000118097	0.705432	1.69339e+09	0.149053	0.105261	1.69339e+09	8.44649e-05	0.000121771	0.705758	1.69339e+09	0.144169	0.101806	1.69339e+09	9.15803e-05	0.000133712	0.705677	1.69339e+09	0.146824	0.103671	1.69339e+09	9.9321e-05
	9	0.149764	0.105736	8.56239e-05	0.000133944	0.705553	0.149139	0.105306	8.7062e-05	0.000127542	0.705651	0.142602	0.100681	9.47502e-05	0.000127356	0.705546	0.146957	0.103794	0.000102032	0.000133723	0.705866			1.69339e+09	0.149763	0.105736	1.69339e+09	8.58204e-05	0.000134128	0.705553	1.69339e+09	0.14911	0.105288	1.69339e+09	8.723e-05	0.000127641	0.70567	1.69339e+09	0.142466	0.100597	1.69339e+09	9.47731e-05	0.000127219	0.705633	1.69339e+09	0.146994	0.103816	1.69339e+09	0.000102096
	10	0.149154	0.105295	8.39269e-05	0.000127843	0.705479	0.147601	0.10423	9.23333e-05	0.000127048	0.705716	0.137764	0.0972436	9.2919e-05	0.000125982	0.705366	0.148477	0.104835	0.000102209	0.000131305	0.705651			1.69339e+09	0.149097	0.10526	1.69339e+09	8.39201e-05	0.0001278	0.705509	1.69339e+09	0.147584	0.10422	1.69339e+09	9.23093e-05	0.000127103	0.705729	1.69339e+09	0.137636	0.0971653	1.69339e+09	9.27751e-05	0.000125995	0.705461	1.69339e+09	0.148483	0.104838	1.69339e+09	0.000102129
	11	0.147015	0.103764	8.53014e-05	0.000131611	0.705329	0.14833	0.104733	8.59321e-05	0.00013053	0.705638	0.136521	0.0964233	8.77215e-05	0.00012806	0.705783	0.147279	0.103975	9.82141e-05	0.000130998	0.705555			1.69339e+09	0.146985	0.103746	1.69339e+09	8.53028e-05	0.00013155	0.705349	1.69339e+09	0.148348	0.104744	1.69339e+09	8.59347e-05	0.000130594	0.705633	1.69339e+09	0.136678	0.0965219	1.69339e+09	8.7848e-05	0.000128133	0.705696	1.69339e+09	0.147248	0.103958	1.69339e+09	9.82888e-05
	12	0.148329	0.104724	8.39657e-05	0.000125886	0.705554	0.148092	0.104595	9.24074e-05	0.00012907	0.705841	0.142124	0.100386	9.64222e-05	0.000128317	0.70584	0.147632	0.104272	0.000104276	0.000132462	0.705879			1.69339e+09	0.148235	0.104668	1.69339e+09	8.37752e-05	0.00012591	0.705618	1.69339e+09	0.148048	0.104568	1.69339e+09	9.25454e-05	0.000129088	0.70587	1.69339e+09	0.142308	0.100498	1.69339e+09	9.65016e-05	0.000128232	0.705719	1.69339e+09	0.147646	0.104281	1.69339e+09	0.000104293
	13	0.142607	0.100707	7.59946e-05	0.000132978	0.705692	0.146248	0.103263	9.24422e-05	0.000131503	0.705632	0.145494	0.102712	9.14712e-05	0.000123402	0.705476	0.147963	0.104484	9.906e-05	0.000132559	0.70573			1.69339e+09	0.142522	0.100654	1.69339e+09	7.58699e-05	0.000132905	0.705746	1.69339e+09	0.146169	0.103213	1.69339e+09	9.22593e-05	0.000131405	0.705677	1.69339e+09	0.145569	0.102757	1.69339e+09	9.13603e-05	0.000123437	0.705428	1.69339e+09	0.147948	0.104474	1.69339e+09	9.88866e-05
	14	0.1443	0.101882	7.78757e-05	0.000121779	0.705559	0.144342	0.101886	8.37777e-05	0.000123767	0.705414	0.145777	0.10293	9.11873e-05	0.000130213	0.705602	0.146882	0.103724	9.58036e-05	0.000127878	0.705754			1.69339e+09	0.14441	0.101949	1.69339e+09	7.78764e-05	0.000121625	0.705485	1.69339e+09	0.144214	0.101807	1.69339e+09	8.35283e-05	0.000123555	0.705492	1.69339e+09	0.145804	0.102948	1.69339e+09	9.12193e-05	0.000130463	0.705595	1.69339e+09	0.146844	0.1037	1.69339e+09	9.5823e-05
	15	0.14566	0.102849	7.60147e-05	0.000128057	0.705606	0.142713	0.100741	8.55355e-05	0.000124735	0.705441	0.146246	0.103272	9.23554e-05	0.000131397	0.705676	0.146914	0.103717	9.95959e-05	0.000126594	0.705549			1.69339e+09	0.145803	0.102936	1.69339e+09	7.59708e-05	0.000128078	0.705515	1.69339e+09	0.142756	0.100768	1.69339e+09	8.55409e-05	0.000124757	0.70542	1.69339e+09	0.146186	0.103234	1.69339e+09	9.23892e-05	0.000131347	0.705711	1.69339e+09	0.146827	0.103663	1.69339e+09	9.9642e-05
	16	0.151026	0.106633	7.58038e-05	0.000122895	0.705593	0.146355	0.103338	8.40308e-05	0.000124998	0.705626	0.142921	0.100862	9.27798e-05	0.000127478	0.705231	0.142604	0.100684	9.79788e-05	0.000133589	0.705605			1.69339e+09	0.151127	0.106695	1.69339e+09	7.57604e-05	0.000122765	0.705527	1.69339e+09	0.14644	0.10339	1.69339e+09	8.41182e-05	0.000124971	0.705579	1.69339e+09	0.142803	0.100789	1.69339e+09	0.000101109	0.000134139	0.705307	1.69339e+09	0.142534	0.100641	1.69339e+09	9.8133e-05
	17	0.150464	0.106219	7.39671e-05	0.000121003	0.705481	0.146691	0.103581	8.96584e-05	0.000123221	0.705671	0.140712	0.0993341	0.000485458	0.000493206	0.705449	0.143493	0.101297	0.000106873	0.000137055	0.705503			1.69339e+09	0.15045	0.106211	1.69339e+09	7.41066e-05	0.000120981	0.705489	1.69339e+09	0.14668	0.103574	1.69339e+09	8.96851e-05	0.000123299	0.705675	1.69339e+09	0.140597	0.0992653	1.69339e+09	0.00048929	0.00049626	0.705537	1.69339e+09	0.143552	0.101335	1.69339e+09	0.000106763
	18	0.15065	0.106371	7.96684e-05	0.000122178	0.705618	0.14607	0.103113	8.4771e-05	0.000127468	0.705467	0.139752	0.0986682	0.000198874	0.000224791	0.705526	0.144239	0.101882	9.49353e-05	0.00012674	0.705916			1.69339e+09			1.69339e+09				1.69339e+09			1.69339e+09				1.69339e+09			1.69339e+09				1.69339e+09			1.69339e+09
	Cup	C	H3	C	H3		C	H3	C	H3		C	H3	C	H3		C	H3	C	H3
	Info	tbdgy	tbdgy	tbdgy	tbdgy		tbdgy	tbdgy	tbdgy	tbdgy		tbdgy	tbdgy	tbdgy	tbdgy		tbdgy	tbdgy	tbdgy	tbdgy
	Mean	0.14749	0.104131	7.90424e-05	0.000125689		0.146261	0.103275	8.71481e-05	0.000127214		0.142019	0.10027	0.000120871	0.000154613		0.1409	0.0994913	9.93742e-05	0.000132095			Mean		0.147439	0.104093		7.89265e-05	0.000125767			0.146264	0.103279		8.70733e-05	0.00012684			0.142299	0.100467		0.000118524	0.000152391			0.140284	0.0990591		9.98233e-05
	StdErr (%)	0.402482	0.401447	1.2176	0.820338		0.356505	0.356742	0.825635	0.623439		0.491379	0.491794	18.4025	13.3373		2.95163	2.95612	0.734709	0.517307
		isotope ratio (blank corrected)		30/29				not-blank corr																isotope ratio (blank corrected)		30/29				not-blank corr
		1		0.70555				0.706023																1		0.70553				0.706005
		2		0.705655				0.706105																2		0.705664				0.706111
		3		0.705544				0.706032																3		0.705544				0.706028
		4		0.705619				0.706114																4		0.705655				0.706131
		average		0.705592	V/V			0.706068																average		0.705598	V/V			0.706069	V/V
				3.85591e-05				3.35026e-05																		5.05444e-05				4.38311e-05
			S1	6.67863e-05	urel			5.80282e-05																	S1	8.75455e-05	urel			7.59177e-05
[truncated: 2 more columns]

## Sheet: raw data 3 seq
	raw data: sample and IDMS measurement																							tau-corrected data ->>
	sample: Si28-33Pr11 Part N.2.1																							tau correction
	Sequence 3	no rotation	10^13 Ohm																							tau constant
																								cup	C	0.6061
		sample (x, Si28)																						cup	H3	0.5266
		Si28_01		bl_01		30Si/29Si-corr_01	Si28_02		bl_02		30Si/29Si-corr_02	Si28_03		bl_03		30Si/29Si-corr_03	Si28_04		bl_04		30Si/29Si-corr_04			Si28_01			bl_01			30Si/29Si-corr_01	Si28_02			bl_02			30Si/29Si-corr_02	Si28_03			bl_03			30Si/29Si-corr_03	Si28_04			bl_04
	Cycle	29.078	30.09	29.078	30.09		29.078	30.09	29.078	30.09		29.078	30.09	29.078	30.09		29.078	30.09	29.078	30.09				time	29.078	30.09	Time	29.078	30.09		time	29.078	30.09	time	29.078	30.09		time	29.078	30.09	time	29.078	30.09		time	29.078	30.09	time	29.078
	1	0.0953253	0.00128589	3.47779e-05	9.01666e-05	0.0125457	0.0885939	0.00115716	3.57146e-05	9.49047e-05	0.0119082	0.0837387	0.00105907	2.91383e-05	0.000100401	0.0114959	0.0785076	0.000968629	3.2613e-05	0.000101295	0.0110914			1.69347e+09			1.69347e+09				1.69347e+09			1.69347e+09				1.69347e+09			1.69347e+09				1.69347e+09			1.69347e+09
	2	0.0953697	0.00127825	3.13385e-05	9.10447e-05	0.0124596	0.0879245	0.00115257	3.56764e-05	0.000101192	0.0119466	0.083955	0.0010562	3.27221e-05	9.66522e-05	0.011432	0.0785374	0.000963769	3.01902e-05	9.72571e-05	0.0110253			1.69347e+09	0.0953582	0.00127808	1.69347e+09	3.11731e-05	9.10869e-05	0.0124579	1.69347e+09	0.087871	0.00115214	1.69347e+09	3.54073e-05	0.000101219	0.0119444	1.69347e+09	0.0839641	0.00105617	1.69347e+09	3.29488e-05	9.65447e-05	0.0114325	1.69347e+09	0.07854	0.000963889	1.69347e+09	2.99037e-05
	3	0.0950063	0.00128073	3.0198e-05	9.15114e-05	0.0125335	0.0871127	0.00114352	2.82646e-05	9.57561e-05	0.0119541	0.0839899	0.00105804	3.54157e-05	9.69751e-05	0.0114491	0.0785782	0.000972442	2.46792e-05	9.6564e-05	0.01113			1.69347e+09	0.0949904	0.00128042	1.69347e+09	3.04089e-05	9.15974e-05	0.0125307	1.69347e+09	0.0871066	0.00114331	1.69347e+09	2.81195e-05	9.56301e-05	0.011948	1.69347e+09	0.0840079	0.00105807	1.69347e+09	3.52555e-05	9.69765e-05	0.0114491	1.69347e+09	0.0785694	0.000972401	1.69347e+09	2.47257e-05
	4	0.0945959	0.00126102	4.12925e-05	9.57137e-05	0.0123795	0.0876263	0.00114094	2.85925e-05	9.43481e-05	0.0118546	0.0848314	0.0010579	2.48955e-05	9.67302e-05	0.0113339	0.0781079	0.000961461	3.23853e-05	9.88778e-05	0.0110564			1.69347e+09	0.0945868	0.00126074	1.69347e+09	4.137e-05	9.57337e-05	0.0123761	1.69347e+09	0.0876531	0.00114088	1.69347e+09	2.86822e-05	9.43676e-05	0.0118456	1.69347e+09	0.0848568	0.00105799	1.69347e+09	2.48055e-05	9.66521e-05	0.0113337	1.69347e+09	0.0780948	0.000961243	1.69347e+09	3.25614e-05
	5	0.0945626	0.00126505	3.38574e-05	9.26011e-05	0.0124264	0.0884231	0.00113989	3.26474e-05	9.68158e-05	0.0117358	0.0852317	0.00106313	3.10171e-05	9.25819e-05	0.0113421	0.0779404	0.000960208	3.29888e-05	0.000100713	0.0110641			1.69347e+09	0.0945823	0.00126504	1.69347e+09	3.35215e-05	9.25351e-05	0.0124221	1.69347e+09	0.0884523	0.00113983	1.69347e+09	3.29326e-05	9.68481e-05	0.0117267	1.69347e+09	0.0852218	0.00106296	1.69347e+09	3.12591e-05	9.2549e-05	0.0113434	1.69347e+09	0.0779387	0.000960135	1.69347e+09	3.54436e-05
	6	0.0951415	0.00126065	3.19935e-05	9.36089e-05	0.0123045	0.0884341	0.00113906	3.64904e-05	9.53765e-05	0.011725	0.0845575	0.00105225	3.15949e-05	9.56817e-05	0.0113038	0.0780611	0.000959131	0.000100358	0.000111629	0.0110332			1.69347e+09	0.095154	0.00126061	1.69347e+09	3.20219e-05	9.3619e-05	0.0123009	1.69347e+09	0.0884333	0.00113899	1.69347e+09	3.70239e-05	9.5595e-05	0.0117197	1.69347e+09	0.0845386	0.00105203	1.69347e+09	3.15488e-05	9.56959e-05	0.0113057	1.69347e+09	0.0780562	0.000958956	1.69347e+09	0.000100208
	7	0.0951528	0.00126278	3.52418e-05	9.31721e-05	0.0123254	0.0883852	0.00113626	5.78279e-05	0.0001091	0.0116997	0.0843393	0.00105116	2.88417e-05	9.33537e-05	0.0113201	0.0777119	0.000950688	2.56519e-05	9.28838e-05	0.0109741			1.69347e+09	0.0951448	0.00126281	1.69347e+09	3.52442e-05	9.31065e-05	0.0123253	1.69347e+09	0.0883823	0.0011361	1.69347e+09	5.79209e-05	0.000109265	0.0116938	1.69347e+09	0.0843279	0.00105092	1.69347e+09	2.88594e-05	9.34063e-05	0.0113209	1.69347e+09	0.0777023	0.000950487	1.69347e+09	2.42294e-05
	8	0.0947623	0.00126262	3.2112e-05	8.99174e-05	0.0123746	0.0882944	0.00113079	4.08803e-05	0.000104635	0.0116498	0.0840205	0.00103931	3.24298e-05	9.85412e-05	0.011222	0.0776092	0.000948191	3.08586e-05	9.76573e-05	0.0109564			1.69347e+09	0.0947555	0.0012623	1.69347e+09	3.18853e-05	8.9927e-05	0.0123705	1.69347e+09	0.0882948	0.00113062	1.69347e+09	4.21951e-05	0.000105697	0.0116433	1.69347e+09	0.0840282	0.00103883	1.69347e+09	3.28949e-05	9.89085e-05	0.0112173	1.69347e+09	0.0775646	0.000947874	1.69347e+09	3.08247e-05
	9	0.0949654	0.00125269	2.89657e-05	9.34789e-05	0.0122435	0.0883968	0.00113093	9.42356e-05	0.000142937	0.011638	0.0845524	0.00103577	4.17183e-05	0.000105059	0.0111095	0.0764789	0.000940601	2.47148e-05	9.59562e-05	0.0110191			1.69347e+09	0.0949525	0.00125223	1.69347e+09	2.90455e-05	9.33842e-05	0.0122387	1.69347e+09	0.0884089	0.00113101	1.69347e+09	9.40086e-05	0.000142761	0.0116326	1.69347e+09	0.0845553	0.00103554	1.69347e+09	4.21285e-05	0.000105022	0.0111084	1.69347e+09	0.0764506	0.000940326	1.69347e+09	2.47107e-05
	10	0.0941299	0.00123666	3.58821e-05	8.47749e-05	0.0121818	0.0888878	0.00113489	2.97888e-05	9.4725e-05	0.0116181	0.0841608	0.00102647	5.24663e-05	9.643e-05	0.0110506	0.0762288	0.000932731	3.06631e-05	9.38785e-05	0.010952			1.69347e+09	0.094106	0.00123629	1.69347e+09	3.59932e-05	8.47125e-05	0.0121794	1.69347e+09	0.0889093	0.00113489	1.69347e+09	2.8685e-05	9.40001e-05	0.0116108	1.69347e+09	0.0841413	0.00102653	1.69347e+09	5.28756e-05	9.63626e-05	0.011056	1.69347e+09	0.0762171	0.000932611	1.69347e+09	3.07512e-05
	11	0.0937972	0.00123206	3.4212e-05	9.00874e-05	0.012176	0.0894442	0.00113129	4.03052e-05	0.000102178	0.0115056	0.0836343	0.00103907	6.17093e-05	0.000101266	0.011271	0.0759055	0.000933829	2.88733e-05	9.73793e-05	0.0110132			1.69347e+09	0.0937923	0.00123193	1.69347e+09	3.3925e-05	9.02632e-05	0.0121737	1.69347e+09	0.0894676	0.0011311	1.69347e+09	4.08218e-05	0.000102498	0.0114959	1.69347e+09	0.0836056	0.00103914	1.69347e+09	6.10415e-05	0.000101358	0.0112777	1.69347e+09	0.0759267	0.000933792	1.69347e+09	2.86876e-05
	12	0.0939942	0.0012325	2.7935e-05	9.03768e-05	0.0121552	0.0895365	0.00112874	4.40919e-05	0.000104916	0.0114652	0.0833671	0.00102857	3.39722e-05	9.93423e-05	0.0111811	0.0768175	0.000931531	2.55199e-05	9.99573e-05	0.0108524			1.69347e+09	0.0939695	0.00123225	1.69347e+09	2.78112e-05	9.0296e-05	0.0121541	1.69347e+09	0.0895128	0.00112851	1.69347e+09	4.40548e-05	0.000104785	0.0114612	1.69347e+09	0.0833131	0.00102794	1.69347e+09	3.33494e-05	9.93042e-05	0.0111829	1.69347e+09	0.0768475	0.000931496	1.69347e+09	2.56841e-05
	13	0.0926328	0.0012182	2.81645e-05	8.55432e-05	0.0121794	0.0883255	0.00111898	3.85548e-05	9.51018e-05	0.0115119	0.0809987	0.00100393	3.1283e-05	9.91243e-05	0.0112039	0.0773244	0.00093194	3.68967e-05	0.00010725	0.0107865			1.69347e+09	0.0926288	0.00121801	1.69347e+09	2.83286e-05	8.55765e-05	0.0121763	1.69347e+09	0.088275	0.00111866	1.69347e+09	3.83294e-05	9.49566e-05	0.0115103	1.69347e+09	0.0809519	0.00100347	1.69347e+09	3.12959e-05	9.90686e-05	0.0112068	1.69347e+09	0.0773297	0.000931833	1.69347e+09	3.6826e-05
	14	0.0938063	0.00122245	3.59528e-05	9.22493e-05	0.0120723	0.087151	0.0011117	3.34508e-05	9.7028e-05	0.0115836	0.0810824	0.00100249	3.4603e-05	9.62104e-05	0.0111745	0.0770661	0.000925722	2.20657e-05	9.47683e-05	0.010742			1.69347e+09	0.093831	0.00122226	1.69347e+09	3.61359e-05	9.23615e-05	0.0120655	1.69347e+09	0.0870972	0.0011112	1.69347e+09	3.32944e-05	9.68898e-05	0.0115803	1.69347e+09	0.0811146	0.00100281	1.69347e+09	3.46035e-05	9.60114e-05	0.0111761	1.69347e+09	0.0770521	0.000925611	1.69347e+09	2.18676e-05
	15	0.0933164	0.00121212	3.32343e-05	8.91194e-05	0.012025	0.0868358	0.00110295	3.42223e-05	9.06956e-05	0.0115249	0.0818913	0.00101402	3.12951e-05	9.27831e-05	0.0112049	0.0769371	0.0009284	3.14128e-05	9.26829e-05	0.0107948			1.69347e+09	0.093281	0.00121173	1.69347e+09	3.32696e-05	8.90546e-05	0.0120238	1.69347e+09	0.0868688	0.00110297	1.69347e+09	3.46133e-05	9.09479e-05	0.011516	1.69347e+09	0.0819249	0.00101419	1.69347e+09	3.11559e-05	9.27179e-05	0.0112045	1.69347e+09	0.0769252	0.000928263	1.69347e+09	3.15444e-05
	16	0.0920747	0.00120085	3.76172e-05	8.87265e-05	0.0120648	0.088762	0.00111237	5.255e-05	0.000111215	0.0113808	0.0827206	0.00101206	2.8031e-05	9.2665e-05	0.0110688	0.0764859	0.000918014	2.82788e-05	9.63826e-05	0.0107227			1.69347e+09	0.0920467	0.00120048	1.69347e+09	3.75414e-05	8.86809e-05	0.0120628	1.69347e+09	0.0888022	0.00111255	1.69347e+09	5.3097e-05	0.000111602	0.0113731	1.69347e+09	0.0827193	0.00101196	1.69347e+09	2.7978e-05	9.26704e-05	0.01107	1.69347e+09	0.0764749	0.000917827	1.69347e+09	2.81154e-05
	17	0.0919458	0.00119112	2.96534e-05	8.66391e-05	0.0119759	0.0887984	0.00111282	6.09448e-05	0.000112452	0.0113812	0.0818283	0.00100881	2.87901e-05	9.30733e-05	0.0111499	0.0764002	0.000917864	2.36994e-05	9.65921e-05	0.0107328			1.69347e+09	0.0919407	0.0011909	1.69347e+09	2.93412e-05	8.66213e-05	0.0119725	1.69347e+09	0.0887841	0.00111256	1.69347e+09	6.06244e-05	0.000112249	0.0113755	1.69347e+09	0.0817899	0.0010083	1.69347e+09	2.88128e-05	9.31731e-05	0.011151	1.69347e+09	0.0763938	0.000917778	1.69347e+09	2.36413e-05
	18	0.091934	0.00119385	2.89739e-05	8.81586e-05	0.0120071	0.0883642	0.00110404	4.36782e-05	0.00010472	0.0113377	0.0816576	0.000995915	2.86575e-05	9.58467e-05	0.0110152	0.0763075	0.000915266	2.6669e-05	9.64155e-05	0.0107117			1.69347e+09			1.69347e+09				1.69347e+09			1.69347e+09				1.69347e+09			1.69347e+09				1.69347e+09			1.69347e+09
	Cup	C	H3	C	H3		C	H3	C	H3		C	H3	C	H3		C	H3	C	H3
	Info	tbdgy	tbdgy	tbdgy	tbdgy		tbdgy	tbdgy	tbdgy	tbdgy		tbdgy	tbdgy	tbdgy	tbdgy		tbdgy	tbdgy	tbdgy	tbdgy
	Mean	0.0940285	0.00124164	3.28557e-05	9.03828e-05		0.0882942	0.00112938	4.2662e-05	0.000102672		0.0833643	0.00103356	3.43656e-05	9.68177e-05		0.0772781	0.000942245	3.26955e-05	9.823e-05			Mean		0.09407	0.00124163		3.29385e-05	9.05348e-05			0.0882699	0.00112908		4.31131e-05	0.000103082			0.0834413	0.00103418		3.50508e-05	9.66513e-05			0.0772552	0.000942158		3.31078e-05
	StdErr (%)	0.2983	0.57521	2.59425	0.761171		0.196961	0.330295	8.80013	2.73191		0.376241	0.517357	6.28227	0.825618		0.268413	0.466572	12.4924	1.14847
		isotope ratio (blank corrected)		30/29				not-blank corr																isotope ratio (blank corrected)		30/29				not-blank corr
		1		0.0122461				0.0132049																1		0.0122394				0.013199
		2		0.0116345				0.0127911																2		0.0116298				0.0127912
		3		0.0112405				0.0123982																3		0.0112398				0.0123941
		4		0.0109255		29/30		0.0121929																4		0.0109289				0.0121954
		average		0.0115116	V/V	86.8686		0.0126468																average		0.0115095	V/V			0.0126449	V/V
				0.0247196				0.0176829																		0.0245378				0.0175863
			S1	0.0428156	urel			0.0306277																	S1	0.0425008	urel			0.0304604
		IDMS blend (bx)
		idms_01		bl_05		30Si/29Si-corr_01	idms_02		bl_06		30Si/29Si-corr_02	idms_03		bl_07		30Si/29Si-corr_03	idms_04		bl_08		30Si/29Si-corr_04			idms_01			bl_05			30Si/29Si-corr_01	idms_02			bl_06			30Si/29Si-corr_02	idms_03			bl_07			30Si/29Si-corr_03	idms_04			bl_08
	Cycle	29.078	30.09	29.078	30.09		29.078	30.09	29.078	30.09		29.078	30.09	29.078	30.09		29.078	30.09	29.078	30.09				time	29.078	30.09	time	29.078	30.09		time	29.078	30.09	time	29.078	30.09		time	29.078	30.09	time	29.078	30.09		time	29.078	30.09	time	29.078
	1	0.0423314	0.161174	2.56177e-05	9.84726e-05	3.80739	0.0419215	0.159588	2.38953e-05	0.000103233	3.80695	0.0404208	0.154048	2.80155e-05	9.86882e-05	3.81109	0.0391623	0.149249	6.33275e-05	0.000184977	3.81139			1.69347e+09			1.69347e+09				1.69347e+09			1.69347e+09				1.69347e+09			1.69347e+09				1.69347e+09			1.69347e+09
	2	0.0424967	0.161864	2.75681e-05	0.000106711	3.80884	0.0417734	0.159015	2.57682e-05	9.77005e-05	3.80675	0.0405846	0.154625	2.91773e-05	9.87354e-05	3.80994	0.0397035	0.151287	5.431e-05	0.0001432	3.81075			1.69347e+09	0.0425006	0.161876	1.69347e+09	2.77206e-05	0.000106774	3.80876	1.69347e+09	0.0417771	0.159031	1.69347e+09	2.58327e-05	9.7501e-05	3.80679	1.69347e+09	0.0405757	0.154591	1.69347e+09	2.89946e-05	9.88787e-05	3.80991	1.69347e+09	0.0397178	0.151332	1.69347e+09	5.34208e-05
	3	0.0424384	0.161556	2.98402e-05	0.000100491	3.8068	0.0420256	0.160092	2.56825e-05	9.68774e-05	3.80953	0.0401741	0.152934	2.29551e-05	0.000103256	3.80677	0.0395593	0.150692	3.87055e-05	0.000110865	3.80959			1.69347e+09	0.0424207	0.161496	1.69347e+09	2.97511e-05	0.000100314	3.80695	1.69347e+09	0.0419941	0.15999	1.69347e+09	2.56415e-05	9.69357e-05	3.80996	1.69347e+09	0.0401652	0.152907	1.69347e+09	2.28794e-05	0.000103276	3.80692	1.69347e+09	0.0395473	0.150653	1.69347e+09	3.84896e-05
	4	0.0416609	0.158574	2.33626e-05	9.70617e-05	3.80626	0.0402363	0.153266	2.37629e-05	0.000100979	3.80929	0.040151	0.153088	2.54791e-05	9.98563e-05	3.81279	0.0391359	0.149206	4.41204e-05	0.000111846	3.81286			1.69347e+09	0.0416446	0.158519	1.69347e+09	2.33037e-05	9.70056e-05	3.80641	1.69347e+09	0.0402139	0.153193	1.69347e+09	2.39312e-05	0.000101038	3.8096	1.69347e+09	0.0401643	0.153134	1.69347e+09	2.5526e-05	9.97065e-05	3.81267	1.69347e+09	0.039133	0.149197	1.69347e+09	4.43726e-05
	5	0.0416694	0.158565	2.70623e-05	9.74453e-05	3.80528	0.040928	0.15597	3.39042e-05	0.000100199	3.81096	0.0408233	0.155533	2.52428e-05	9.48287e-05	3.8099	0.0394226	0.150211	5.06068e-05	0.000117092	3.81061			1.69347e+09	0.0417041	0.158682	1.69347e+09	2.72021e-05	9.7518e-05	3.80491	1.69347e+09	0.0409778	0.156134	1.69347e+09	3.39862e-05	0.000100029	3.81033	1.69347e+09	0.0408476	0.155611	1.69347e+09	2.52594e-05	9.478e-05	3.80953	1.69347e+09	0.0394137	0.150179	1.69347e+09	5.01687e-05
	6	0.0426199	0.162301	2.72352e-05	9.93792e-05	3.80807	0.0416151	0.158487	2.60342e-05	9.55601e-05	3.80852	0.0408235	0.155556	2.594e-05	9.83044e-05	3.81044	0.0388899	0.148177	3.19874e-05	0.000107897	3.81052			1.69347e+09	0.0426473	0.162394	1.69347e+09	2.71779e-05	9.94082e-05	3.80779	1.69347e+09	0.0416366	0.158557	1.69347e+09	2.5835e-05	9.56458e-05	3.80826	1.69347e+09	0.0407855	0.155429	1.69347e+09	2.59257e-05	9.83965e-05	3.81088	1.69347e+09	0.0388625	0.148088	1.69347e+09	3.13904e-05
	7	0.0430101	0.163791	2.42629e-05	9.90781e-05	3.80817	0.0419769	0.15992	2.41753e-05	0.000104858	3.80984	0.0389653	0.148429	2.45682e-05	9.9833e-05	3.80923	0.0380824	0.145173	2.14423e-05	9.65744e-05	3.81244			1.69347e+09	0.0430187	0.16382	1.69347e+09	2.43135e-05	9.91842e-05	3.80807	1.69347e+09	0.0419518	0.159836	1.69347e+09	2.4106e-05	0.000104854	3.81013	1.69347e+09	0.0389116	0.148249	1.69347e+09	2.45806e-05	9.99161e-05	3.80986	1.69347e+09	0.0380792	0.145163	1.69347e+09	2.12194e-05
	8	0.0430437	0.163944	2.97046e-05	0.000105345	3.80875	0.0403858	0.153738	2.26514e-05	9.53259e-05	3.80687	0.0382018	0.14545	2.65248e-05	0.000102822	3.8074	0.0387348	0.147587	2.11018e-05	0.000102502	3.81053			1.69347e+09	0.0430396	0.163932	1.69347e+09	2.97748e-05	0.00010538	3.80881	1.69347e+09	0.0402999	0.153452	1.69347e+09	2.26877e-05	9.51114e-05	3.80788	1.69347e+09	0.0381765	0.145367	1.69347e+09	2.67611e-05	0.000102803	3.80774	1.69347e+09	0.0387703	0.147706	1.69347e+09	2.12592e-05
	9	0.0428958	0.163395	2.62063e-05	0.000100204	3.80909	0.0395996	0.150787	2.51807e-05	9.80194e-05	3.80792	0.0382629	0.145771	3.11126e-05	9.92444e-05	3.8097	0.0390665	0.148971	2.57998e-05	9.86514e-05	3.81361			1.69347e+09	0.0428707	0.163311	1.69347e+09	2.61035e-05	0.000100102	3.80933	1.69347e+09	0.0395962	0.150777	1.69347e+09	2.5335e-05	9.80941e-05	3.80801	1.69347e+09	0.0383149	0.145946	1.69347e+09	3.10337e-05	9.92599e-05	3.80909	1.69347e+09	0.0390964	0.149072	1.69347e+09	2.59916e-05
	10	0.0418171	0.159195	2.48558e-05	9.98025e-05	3.80689	0.040226	0.153217	2.9936e-05	9.95293e-05	3.80903	0.0406588	0.154966	2.26708e-05	0.000103691	3.81138	0.0401473	0.153073	3.01523e-05	0.000102496	3.81311			1.69347e+09	0.0417972	0.159128	1.69347e+09	2.47618e-05	9.97752e-05	3.80709	1.69347e+09	0.0402461	0.153284	1.69347e+09	2.99096e-05	9.95552e-05	3.80881	1.69347e+09	0.0407176	0.155163	1.69347e+09	2.25912e-05	0.000103651	3.81068	1.69347e+09	0.040171	0.15315	1.69347e+09	3.0205e-05
	11	0.0419245	0.159643	2.17666e-05	9.87182e-05	3.80782	0.0405471	0.154438	2.39314e-05	9.94732e-05	3.80899	0.0410419	0.156434	2.7226e-05	9.6993e-05	3.81157	0.0401853	0.153154	2.82879e-05	9.9037e-05	3.81153			1.69347e+09	0.0419674	0.159788	1.69347e+09	2.18468e-05	9.8744e-05	3.8074	1.69347e+09	0.0405884	0.154565	1.69347e+09	2.39354e-05	9.95768e-05	3.80826	1.69347e+09	0.0410672	0.156516	1.69347e+09	2.74699e-05	9.68077e-05	3.81121	1.69347e+09	0.0401819	0.153143	1.69347e+09	2.81669e-05
	12	0.0430028	0.163839	2.70752e-05	0.000100626	3.80993	0.0413699	0.157274	3.00454e-05	0.000102832	3.80177	0.0413598	0.15758	2.94234e-05	9.77844e-05	3.80996	0.040052	0.152718	2.68019e-05	0.000101359	3.81332			1.69347e+09	0.0430307	0.163932	1.69347e+09	2.71397e-05	0.000100591	3.80961	1.69347e+09	0.0414025	0.157383	1.69347e+09	3.01199e-05	0.000102927	3.80143	1.69347e+09	0.0413679	0.157605	1.69347e+09	2.93602e-05	9.77576e-05	3.80983	1.69347e+09	0.0400418	0.152685	1.69347e+09	2.67445e-05
	13	0.0432421	0.164703	2.48111e-05	9.68381e-05	3.80882	0.0420822	0.160353	2.74456e-05	0.000104655	3.81059	0.0414237	0.157822	2.41376e-05	9.54875e-05	3.80994	0.0396879	0.151308	2.54827e-05	9.99343e-05	3.81278			1.69347e+09	0.0432527	0.164738	1.69347e+09	2.47738e-05	9.68331e-05	3.80867	1.69347e+09	0.0420968	0.160407	1.69347e+09	2.74307e-05	0.000104608	3.81057	1.69347e+09	0.0414248	0.157826	1.69347e+09	2.40098e-05	9.54317e-05	3.80993	1.69347e+09	0.0396821	0.151289	1.69347e+09	2.53505e-05
	14	0.0435033	0.165713	2.53119e-05	0.000100357	3.80917	0.0420592	0.160245	2.93408e-05	0.000100278	3.81012	0.041415	0.15781	2.31792e-05	9.46435e-05	3.81046	0.0397685	0.151652	2.03404e-05	9.67925e-05	3.8137			1.69347e+09	0.0435044	0.165714	1.69347e+09	2.52972e-05	0.000100391	3.80907	1.69347e+09	0.042057	0.160236	1.69347e+09	2.9282e-05	0.000100016	3.81012	1.69347e+09	0.0414098	0.157791	1.69347e+09	2.32794e-05	9.482e-05	3.81045	1.69347e+09	0.0397645	0.151637	1.69347e+09	2.08258e-05
	15	0.0432718	0.164725	2.44041e-05	9.79068e-05	3.80673	0.0420189	0.160063	2.58155e-05	9.63056e-05	3.80943	0.0412818	0.157204	2.69135e-05	0.000101112	3.80806	0.0395765	0.150835	3.89259e-05	0.000139869	3.81155			1.69347e+09	0.0432418	0.164624	1.69347e+09	2.43762e-05	9.78078e-05	3.80701	1.69347e+09	0.0419887	0.159962	1.69347e+09	2.59835e-05	9.62904e-05	3.80977	1.69347e+09	0.0412461	0.157086	1.69347e+09	2.6901e-05	0.000101192	3.80847	1.69347e+09	0.0395741	0.150827	1.69347e+09	3.89522e-05
	16	0.0420374	0.160006	2.39466e-05	9.47946e-05	3.80625	0.0405837	0.154551	3.75509e-05	9.94249e-05	3.80833	0.0396743	0.151159	2.2586e-05	9.90281e-05	3.80999	0.0396493	0.151202	2.16254e-05	0.00010399	3.81383			1.69347e+09	0.0420154	0.159934	1.69347e+09	2.38973e-05	9.4786e-05	3.80651	1.69347e+09	0.0405503	0.154441	1.69347e+09	3.76342e-05	9.94619e-05	3.80877	1.69347e+09	0.0396422	0.151055	1.69347e+09	2.25345e-05	9.89163e-05	3.81044	1.69347e+09	0.0396444	0.151187	1.69347e+09	2.13025e-05
	17	0.042197	0.160677	2.1994e-05	9.74245e-05	3.80775	0.0403849	0.153863	2.98878e-05	9.83864e-05	3.81003	0.039714	0.151348	2.4483e-05	9.5039e-05	3.81094	0.039334	0.149966	2.31535e-05	9.90265e-05	3.81297			1.69347e+09	0.0422171	0.160747	1.69347e+09	2.2177e-05	9.76508e-05	3.80757	1.69347e+09	0.0403816	0.153851	1.69347e+09	2.96411e-05	9.84039e-05	3.81008	1.69347e+09	0.0397282	0.151396	1.69347e+09	2.45849e-05	9.50959e-05	3.81079	1.69347e+09	0.0392741	0.149765	1.69347e+09	2.32938e-05
	18	0.0425924	0.162212	2.90133e-05	0.000102009	3.80844	0.0404922	0.154189	3.07193e-05	9.99808e-05	3.80799	0.0400672	0.152697	2.54064e-05	0.000100843	3.81101	0.0379912	0.144797	2.55103e-05	9.67775e-05	3.81167			1.69347e+09			1.69347e+09				1.69347e+09			1.69347e+09				1.69347e+09			1.69347e+09				1.69347e+09			1.69347e+09
	Cup	C	H3	C	H3		C	H3	C	H3		C	H3	C	H3		C	H3	C	H3
	Info	tbdgy	tbdgy	tbdgy	tbdgy		tbdgy	tbdgy	tbdgy	tbdgy		tbdgy	tbdgy	tbdgy	tbdgy		tbdgy	tbdgy	tbdgy	tbdgy
	Mean	0.0425419	0.161993	2.57799e-05	9.95925e-05		0.0411237	0.156614	2.75404e-05	9.96454e-05		0.0402802	0.15347	2.58356e-05	9.88995e-05		0.0393416	0.149959	3.28712e-05	0.000111827			Mean		0.0425546	0.16204		2.56011e-05	9.95166e-05			0.0411099	0.156569		2.75807e-05	9.9378e-05			0.0402841	0.153479		2.57307e-05	9.87931e-05			0.0394346	0.150317		3.13221e-05
	StdErr (%)	0.3191	0.324499	2.1844	0.688732		0.472736	0.473774	3.37775	0.679188		0.586344	0.588731	2.24706	0.670243		0.374272	0.375983	9.15442	4.80594
		isotope ratio (blank corrected)		30/29				not-blank corr																isotope ratio (blank corrected)		30/29				not-blank corr
		1		3.8078				3.80785																1		3.80775				3.80781
		2		3.8085				3.80837																2		3.80867				3.80854
		3		3.81003				3.81005																3		3.8099				3.80993
		4		3.81204				3.8117																4		3.81208				3.8118
		average		3.80959	V/V			3.80949																average		3.8096	V/V			3.80952	V/V
				0.0002467				0.00022942																		0.000246114				0.000230446
			S1	0.000427297	urel			0.000397367																	S1	0.000426282	urel			0.000399144
		material w (WASO04)				material: WASO04 41963/04/72-75 part Mi 2.08
		waso_01		bl_09		30Si/29Si-corr_01	waso_02		bl_10		30Si/29Si-corr_02	waso_03		bl_11		30Si/29Si-corr_03	waso_04		bl_12		30Si/29Si-corr_04			waso_01			bl_09			30Si/29Si-corr_01	waso_02			bl_10			30Si/29Si-corr_02	waso_03			bl_11			30Si/29Si-corr_03	waso_04			bl_12
	Cycle	29.078	30.09	29.078	30.09		29.078	30.09	29.078	30.09		29.078	30.09	29.078	30.09		29.078	30.09	29.078	30.09				time	29.078	30.09	time	29.078	30.09		time	29.078	30.09	time	29.078	30.09		time	29.078	30.09	time	29.078	30.09		time	29.078	30.09	time	29.078
	1	0.14886	0.104884	2.8099e-05	0.000105668	0.704021	0.151991	0.107098	3.89827e-05	0.000106762	0.704115	0.157476	0.110985	0.000361543	0.000347634	0.704274	0.148613	0.104764	4.80594e-05	0.000108643	0.704411			1.69347e+09			1.69347e+09				1.69347e+09			1.69347e+09				1.69348e+09			1.69348e+09				1.69348e+09			1.69348e+09
	2	0.151403	0.106782	2.96646e-05	0.000100242	0.704731	0.156001	0.109941	4.2645e-05	0.000111216	0.704242	0.157428	0.110956	0.000119512	0.000166462	0.704301	0.152925	0.107808	5.02949e-05	0.000118879	0.70446			1.69347e+09	0.151705	0.106968	1.69347e+09	2.9707e-05	0.000100299	0.704556	1.69347e+09	0.156286	0.110117	1.69347e+09	4.25278e-05	0.000111251	0.704078	1.69348e+09	0.157359	0.110912	1.69348e+09	0.000108673	0.000159325	0.704342	1.69348e+09	0.153165	0.107955	1.69348e+09	5.03125e-05
	3	0.157224	0.11083	2.92736e-05	0.000107497	0.704383	0.159891	0.112686	3.5737e-05	0.000107887	0.704268	0.15554	0.109595	6.14026e-05	0.000120158	0.704098	0.155263	0.109425	4.85455e-05	0.000119234	0.704259			1.69347e+09	0.157316	0.110884	1.69347e+09	2.9315e-05	0.000107512	0.704319	1.69347e+09	0.15989	0.112685	1.69347e+09	3.5749e-05	0.000107804	0.704269	1.69348e+09	0.155602	0.109632	1.69348e+09	5.99571e-05	0.000119295	0.704064	1.69348e+09	0.155365	0.109486	1.69348e+09	4.85053e-05
	4	0.155881	0.109854	3.16887e-05	0.000101109	0.704191	0.15593	0.109896	4.32312e-05	0.000106707	0.704267	0.160434	0.113043	4.89027e-05	0.000117935	0.704118	0.15774	0.11117	4.83304e-05	0.000107425	0.704266			1.69347e+09	0.155795	0.1098	1.69347e+09	3.17042e-05	0.000101023	0.704239	1.69347e+09	0.15585	0.109847	1.69347e+09	4.33725e-05	0.000106748	0.704313	1.69348e+09	0.160522	0.113097	1.69348e+09	4.85718e-05	0.000117656	0.704075	1.69348e+09	0.157796	0.111204	1.69348e+09	4.83158e-05
	5	0.152984	0.107823	3.00302e-05	0.000102622	0.704251	0.155988	0.109932	4.26429e-05	0.000110104	0.704234	0.159816	0.112625	4.5238e-05	0.000104445	0.704223	0.157925	0.111294	4.7833e-05	0.000119079	0.704228			1.69347e+09	0.152961	0.107809	1.69347e+09	2.98509e-05	0.000102696	0.704269	1.69347e+09	0.15612	0.110013	1.69347e+09	4.25174e-05	0.000109992	0.704159	1.69348e+09	0.159798	0.112613	1.69348e+09	4.50136e-05	0.00010411	0.704235	1.69348e+09	0.157945	0.111306	1.69348e+09	4.78469e-05
	6	0.155231	0.109415	2.67239e-05	0.000103438	0.704317	0.159582	0.112483	3.97567e-05	0.000103147	0.704365	0.159919	0.112663	4.26882e-05	0.000107265	0.704004	0.158297	0.111536	4.8715e-05	0.000115711	0.704096			1.69347e+09	0.15541	0.109524	1.69347e+09	2.65756e-05	0.000103465	0.704208	1.69347e+09	0.159681	0.112543	1.69347e+09	3.9616e-05	0.000103057	0.704305	1.69348e+09	0.159957	0.112687	1.69348e+09	4.27654e-05	0.000107276	0.703992	1.69348e+09	0.158317	0.111548	1.69348e+09	4.87259e-05
	7	0.161726	0.113962	2.27849e-05	0.000104164	0.704146	0.160668	0.113206	3.60026e-05	0.000105069	0.704104	0.161615	0.113936	4.88775e-05	0.000105014	0.704496	0.1589	0.111974	4.83656e-05	0.000112399	0.704184			1.69347e+09	0.161846	0.114035	1.69347e+09	2.28423e-05	0.00010421	0.704074	1.69347e+09	0.160705	0.113229	1.69347e+09	3.59804e-05	0.000105157	0.704082	1.69348e+09	0.161613	0.113935	1.69348e+09	4.88994e-05	0.000105067	0.704504	1.69348e+09	0.158873	0.111958	1.69348e+09	4.84257e-05
	8	0.161133	0.113548	2.95289e-05	0.000106025	0.704167	0.161341	0.113722	3.8709e-05	0.000108107	0.704362	0.159793	0.112581	4.37212e-05	0.000110124	0.70405	0.156982	0.110621	5.16513e-05	0.000117662	0.704169			1.69347e+09	0.16114	0.113554	1.69347e+09	2.94854e-05	0.00010593	0.704175	1.69347e+09	0.161386	0.113751	1.69347e+09	3.87483e-05	0.000108145	0.704346	1.69348e+09	0.159733	0.112543	1.69348e+09	4.36342e-05	0.000110372	0.704078	1.69348e+09	0.156942	0.110597	1.69348e+09	5.16666e-05
	9	0.161911	0.114155	2.15778e-05	0.00010115	0.704535	0.161919	0.114142	3.70931e-05	0.000106288	0.704445	0.15998	0.112725	4.64703e-05	0.00011293	0.704129	0.157812	0.11122	4.87893e-05	0.000115748	0.70426			1.69347e+09	0.161877	0.114134	1.69347e+09	2.15051e-05	0.000101115	0.704549	1.69347e+09	0.161909	0.114136	1.69347e+09	3.70278e-05	0.000106238	0.70445	1.69348e+09	0.159933	0.112697	1.69348e+09	4.65136e-05	0.000112886	0.704163	1.69348e+09	0.157804	0.111216	1.69348e+09	4.87097e-05
	10	0.159481	0.112342	2.6097e-05	0.000104119	0.703895	0.160851	0.11337	3.55176e-05	0.000105401	0.704321	0.157505	0.11099	4.58365e-05	0.000107641	0.70418	0.156605	0.110406	4.78931e-05	0.000114193	0.704491			1.69347e+09	0.159427	0.112308	1.69347e+09	2.61744e-05	0.000104078	0.703923	1.69347e+09	0.160792	0.113333	1.69347e+09	3.54543e-05	0.000105348	0.70435	1.69348e+09	0.157413	0.110935	1.69348e+09	4.57755e-05	0.000107495	0.704239	1.69348e+09	0.156647	0.110432	1.69348e+09	4.7955e-05
	11	0.159257	0.112264	2.52338e-05	9.8903e-05	0.7044	0.159037	0.112077	3.40008e-05	0.000103428	0.704227	0.155528	0.109595	4.34896e-05	0.000104709	0.704156	0.15982	0.112634	5.17113e-05	0.000110136	0.70426			1.69347e+09	0.159204	0.112234	1.69347e+09	2.51331e-05	9.87091e-05	0.704447	1.69347e+09	0.158734	0.11189	1.69347e+09	3.39334e-05	0.000103354	0.704393	1.69348e+09	0.155588	0.109633	1.69348e+09	4.32749e-05	0.00010483	0.704135	1.69348e+09	0.159835	0.11264	1.69348e+09	5.14432e-05
	12	0.158003	0.111384	2.33088e-05	9.79387e-05	0.704418	0.152476	0.107422	3.3652e-05	0.00010305	0.704001	0.159146	0.11219	3.9894e-05	0.000111506	0.704457	0.157004	0.110604	4.04679e-05	0.00011489	0.703962			1.69347e+09	0.157878	0.111307	1.69347e+09	2.32948e-05	9.8014e-05	0.704489	1.69347e+09	0.152449	0.107406	1.69347e+09	3.37158e-05	0.000103155	0.70402	1.69348e+09	0.159119	0.112174	1.69348e+09	4.01303e-05	0.000111783	0.704478	1.69348e+09	0.156888	0.110532	1.69348e+09	4.20546e-05
	13	0.153339	0.108085	2.45496e-05	0.000103137	0.704332	0.157767	0.111218	3.70138e-05	0.000109303	0.704448	0.154208	0.108672	5.46425e-05	0.000119732	0.704203	0.154134	0.108598	0.000126604	0.000167276	0.704054			1.69347e+09	0.153417	0.108133	1.69347e+09	2.45893e-05	0.000103256	0.704285	1.69347e+09	0.157989	0.111355	1.69347e+09	3.71349e-05	0.000109321	0.704324	1.69348e+09	0.15414	0.108631	1.69348e+09	5.47816e-05	0.000119699	0.704247	1.69348e+09	0.154122	0.108591	1.69348e+09	0.000127219
	14	0.161705	0.114002	2.52489e-05	0.000104616	0.704482	0.162946	0.114851	3.93679e-05	0.000104055	0.704355	0.155852	0.10985	4.64579e-05	0.000109672	0.70433	0.15641	0.110242	6.95241e-05	0.000125118	0.704318			1.69347e+09	0.162075	0.114228	1.69347e+09	2.56387e-05	0.000104581	0.704268	1.69347e+09	0.163162	0.114982	1.69347e+09	3.92841e-05	0.000103881	0.704227	1.69348e+09	0.156061	0.109979	1.69348e+09	4.61768e-05	0.00010931	0.70422	1.69348e+09	0.1566	0.110359	1.69348e+09	6.70176e-05
	15	0.163586	0.115291	3.53415e-05	0.00010202	0.704262	0.163743	0.115401	3.46926e-05	0.00010377	0.704284	0.159997	0.112794	4.68571e-05	0.0001082	0.704482	0.159392	0.112334	5.71985e-05	0.000113157	0.704267			1.69347e+09	0.163656	0.115333	1.69347e+09	3.53735e-05	0.000102012	0.704216	1.69347e+09	0.16379	0.115429	1.69347e+09	3.47265e-05	0.000103809	0.704254	1.69348e+09	0.160119	0.112868	1.69348e+09	4.68077e-05	0.000108207	0.704411	1.69348e+09	0.159461	0.112375	1.69348e+09	5.70198e-05
	16	0.165131	0.116357	2.67587e-05	0.000104208	0.70413	0.165246	0.116442	4.10219e-05	0.000106218	0.704181	0.161649	0.113884	4.4044e-05	0.000110078	0.704028	0.159781	0.112569	6.0791e-05	0.000122084	0.704023			1.69347e+09	0.16516	0.116375	1.69347e+09	2.65574e-05	0.000104189	0.704113	1.69347e+09	0.165244	0.116441	1.69347e+09	4.10843e-05	0.000106221	0.704181	1.69348e+09	0.161681	0.113903	1.69348e+09	4.39203e-05	0.000110069	0.704009	1.69348e+09	0.159797	0.112579	1.69348e+09	6.15675e-05
	17	0.164983	0.11627	2.5838e-05	0.00010097	0.704235	0.163675	0.115354	3.774e-05	0.000103935	0.704292	0.161513	0.113812	4.08148e-05	0.000107666	0.704177	0.16017	0.112903	9.51327e-05	0.000144399	0.704401			1.69347e+09	0.164955	0.116254	1.69347e+09	2.58889e-05	0.000100802	0.704252	1.69347e+09	0.163646	0.115337	1.69347e+09	3.76413e-05	0.000103876	0.704307	1.69348e+09	0.161517	0.113817	1.69348e+09	4.13227e-05	0.000107951	0.704191	1.69348e+09	0.160209	0.112928	1.69348e+09	9.52544e-05
	18	0.164381	0.115843	2.81678e-05	9.88402e-05	0.704213	0.164445	0.115876	3.82908e-05	0.000104342	0.704168	0.161783	0.114038	5.81079e-05	0.000119178	0.704395	0.160873	0.113382	6.41616e-05	0.000118906	0.704305			1.69347e+09			1.69347e+09				1.69347e+09			1.69347e+09				1.69348e+09			1.69348e+09				1.69348e+09			1.69348e+09
	Cup	C	H3	C	H3		C	H3	C	H3		C	H3	C	H3		C	H3	C	H3
	Info	tbdgy	tbdgy	tbdgy	tbdgy		tbdgy	tbdgy	tbdgy	tbdgy		tbdgy	tbdgy	tbdgy	tbdgy		tbdgy	tbdgy	tbdgy	tbdgy
	Mean	0.158679	0.111838	2.72175e-05	0.000102593		0.159639	0.112507	3.81165e-05	0.000106044		0.158843	0.111941	6.88056e-05	0.000127242		0.157147	0.110749	5.85594e-05	0.000120274			Mean		0.158989	0.112055		2.71022e-05	0.000102618			0.159852	0.112656		3.80321e-05	0.000106085			0.15876	0.111878		5.03886e-05	0.000113458			0.157485	0.110982		5.88775e-05
	StdErr (%)	0.726297	0.72488	2.94359	0.610211		0.581048	0.582043	1.8299	0.551294		0.355497	0.355752	25.7663	10.5142		0.448642	0.447105	8.42971	2.79343
		isotope ratio (blank corrected)		30/29				not-blank corr																isotope ratio (blank corrected)		30/29				not-blank corr
		1		0.704284				0.704809																1		0.704274				0.704798
		2		0.70426				0.704757																2		0.704254				0.704751
		3		0.704228				0.704724																3		0.704211				0.704703
		4		0.704245				0.704747																4		0.704204				0.70471
		average		0.704254	V/V			0.704759																average		0.704236	V/V			0.70474	V/V
				1.68523e-05				2.54074e-05																		2.37415e-05				3.11022e-05
			S1	2.9189e-05	urel			4.40069e-05																	S1	4.11215e-05	urel			5.38707e-05
[truncated: 2 more columns]

## Sheet: raw data 4 seq
	raw data: sample and IDMS measurement																							tau-corrected data ->>
	sample: Si28-33Pr11 Part N.2.1																							tau correction
	Sequence 4	no rotation	10^13 Ohm																							tau constant
																								cup	C	0.6061
		sample (x, Si28)																						cup	H3	0.5266
		Si28_01		bl_01		30Si/29Si-corr_01	Si28_02		bl_02		30Si/29Si-corr_02	Si28_03		bl_03		30Si/29Si-corr_03	Si28_04		bl_04		30Si/29Si-corr_04			Si28_01			bl_01			30Si/29Si-corr_01	Si28_02			bl_02			30Si/29Si-corr_02	Si28_03			bl_03			30Si/29Si-corr_03	Si28_04			bl_04
	Cycle	29.079	30.091	29.079	30.091		29.079	30.091	29.079	30.091		29.079	30.091	29.079	30.091		29.079	30.091	29.079	30.091				time	29.078	30.09	Time	29.078	30.09		time	29.078	30.09	time	29.078	30.09		time	29.078	30.09	time	29.078	30.09		time	29.078	30.09	time	29.078
	1	0.0713197	0.000863087	1.09404e-05	6.53378e-05	0.0112088	0.0697442	0.0008177	1.27049e-05	7.37737e-05	0.0106997	0.0645918	0.000744453	1.84486e-05	9.03315e-05	0.0103241	0.0608162	0.000683786	7.43721e-06	7.96353e-05	0.00990724			1.69348e+09			1.69348e+09				1.69348e+09			1.69348e+09				1.69348e+09			1.69348e+09				1.69348e+09			1.69348e+09
	2	0.0712058	0.000855032	6.86306e-06	6.07097e-05	0.0111136	0.0693229	0.000814663	8.16703e-06	7.57955e-05	0.0107209	0.0640852	0.000737677	1.21698e-05	8.35393e-05	0.0103	0.0608715	0.000695644	1.3601e-05	8.58406e-05	0.0100931			1.69348e+09	0.0712038	0.00085475	1.69348e+09	6.71024e-06	6.07167e-05	0.0111122	1.69348e+09	0.069307	0.000814242	1.69348e+09	8.15803e-06	7.56661e-05	0.0107184	1.69348e+09	0.0640627	0.000737399	1.69348e+09	1.18313e-05	8.32444e-05	0.0103085	1.69348e+09	0.0608686	0.000695697	1.69348e+09	1.36635e-05
	3	0.071266	0.000854101	6.70851e-06	6.55598e-05	0.0110912	0.0693032	0.000804291	1.24556e-05	6.965e-05	0.0105743	0.0639674	0.000735589	9.07377e-06	8.09361e-05	0.0102863	0.0607376	0.000685453	9.16832e-06	8.24957e-05	0.00994752			1.69348e+09	0.0713058	0.000854407	1.69348e+09	6.74276e-06	6.55972e-05	0.0110915	1.69348e+09	0.0693111	0.000804129	1.69348e+09	1.2467e-05	6.95157e-05	0.0105718	1.69348e+09	0.0639725	0.000735605	1.69348e+09	8.9517e-06	8.0824e-05	0.010295	1.69348e+09	0.0607204	0.000685079	1.69348e+09	8.99275e-06
	4	0.0731475	0.000872255	8.4801e-06	6.27467e-05	0.0110541	0.0696931	0.000805863	8.70406e-06	6.85018e-05	0.0105377	0.0643269	0.000738543	6.20639e-06	7.72338e-05	0.0102747	0.0600289	0.000674619	5.31387e-06	8.11734e-05	0.00988448			1.69348e+09	0.0731736	0.000872376	1.69348e+09	8.46038e-06	6.26759e-05	0.011054	1.69348e+09	0.0696823	0.000805844	1.69348e+09	8.65104e-06	6.85697e-05	0.0105401	1.69348e+09	0.0643301	0.000738526	1.69348e+09	6.08484e-06	7.71365e-05	0.0102832	1.69348e+09	0.0600175	0.000674432	1.69348e+09	5.38076e-06
	5	0.0725374	0.0008609	5.77793e-06	6.17111e-05	0.0109905	0.0687911	0.000803253	9.95252e-06	7.33389e-05	0.0106379	0.0641189	0.000734656	3.13572e-06	7.54674e-05	0.0102474	0.060181	0.000674936	1.23262e-05	8.42634e-05	0.00986475			1.69348e+09	0.0724947	0.000860493	1.69348e+09	5.77642e-06	6.17992e-05	0.0109936	1.69348e+09	0.0687596	0.00080304	1.69348e+09	9.87645e-06	7.33784e-05	0.0106407	1.69348e+09	0.0641141	0.000734492	1.69348e+09	3.09555e-06	7.54972e-05	0.0102549	1.69348e+09	0.0601807	0.000674932	1.69348e+09	1.22411e-05
	6	0.0719646	0.000859273	8.43843e-06	6.55547e-05	0.0110554	0.0688217	0.00079907	6.5977e-06	6.97608e-05	0.0105724	0.0641932	0.00073332	5.094e-06	7.81849e-05	0.0102148	0.0600192	0.000674499	2.95678e-06	7.90348e-05	0.00988407			1.69348e+09	0.0719276	0.00085898	1.69348e+09	8.48e-06	6.55595e-05	0.0110592	1.69348e+09	0.0688022	0.000798752	1.69348e+09	6.44774e-06	6.98493e-05	0.0105718	1.69348e+09	0.0641721	0.000733196	1.69348e+09	5.10858e-06	7.82e-05	0.0102254	1.69348e+09	0.0600049	0.000674373	1.69348e+09	2.90562e-06
	7	0.0707926	0.000844982	7.80806e-06	6.19846e-05	0.0110365	0.067841	0.000785391	2.62771e-06	7.81461e-05	0.0105236	0.0630903	0.000727701	3.8241e-06	7.62832e-05	0.0103043	0.059484	0.000667858	9.82724e-06	8.09584e-05	0.00986136			1.69348e+09	0.0707915	0.000844885	1.69348e+09	7.79983e-06	6.2034e-05	0.0110376	1.69348e+09	0.0678412	0.000785421	1.69348e+09	2.72652e-06	7.81275e-05	0.0105251	1.69348e+09	0.0630557	0.000727523	1.69348e+09	3.76062e-06	7.62589e-05	0.0103165	1.69348e+09	0.0594764	0.000667678	1.69348e+09	9.97232e-06
	8	0.0719153	0.000853969	8.03642e-06	6.83341e-05	0.0109892	0.068831	0.000800761	1.14239e-05	6.87487e-05	0.0105955	0.062503	0.000723334	2.09767e-06	7.6868e-05	0.0103312	0.0596493	0.000664372	1.00437e-05	8.24091e-05	0.00977557			1.69348e+09	0.0719379	0.000854074	1.69348e+09	8.01164e-06	6.832e-05	0.0109894	1.69348e+09	0.068886	0.000801384	1.69348e+09	1.14614e-05	6.85779e-05	0.0105972	1.69348e+09	0.0624786	0.000723143	1.69348e+09	2.34763e-06	7.70284e-05	0.0103417	1.69348e+09	0.0596525	0.000664276	1.69348e+09	1.01612e-05
	9	0.0714203	0.000848318	7.12208e-06	6.15336e-05	0.0109862	0.0693636	0.000805262	3.66541e-06	7.27022e-05	0.0105791	0.0624146	0.00072162	1.07455e-05	8.13921e-05	0.0103184	0.0595724	0.000664825	1.30801e-05	8.13842e-05	0.0097958			1.69348e+09	0.0713956	0.00084794	1.69348e+09	7.20242e-06	6.14295e-05	0.010987	1.69348e+09	0.0693638	0.000805078	1.69348e+09	3.62608e-06	7.27932e-05	0.0105774	1.69348e+09	0.0624385	0.00072167	1.69348e+09	1.07218e-05	8.13229e-05	0.0103248	1.69348e+09	0.0595604	0.000664763	1.69348e+09	1.30502e-05
	10	0.0707499	0.000833423	1.19617e-05	6.24802e-05	0.0108798	0.0688424	0.000790779	9.56747e-06	7.38694e-05	0.0104488	0.0636322	0.000726074	9.40914e-07	7.29761e-05	0.0101909	0.0590873	0.000661016	8.63285e-06	7.81701e-05	0.00981177			1.69348e+09	0.0707379	0.000833278	1.69348e+09	1.20341e-05	6.25272e-05	0.0108819	1.69348e+09	0.0688311	0.000790486	1.69348e+09	9.64529e-06	7.38844e-05	0.0104473	1.69348e+09	0.0636492	0.000726015	1.69348e+09	7.8569e-07	7.29414e-05	0.0101966	1.69348e+09	0.0590744	0.000660889	1.69348e+09	8.47724e-06
	11	0.0708551	0.000840437	1.06565e-05	6.41731e-05	0.0109626	0.068831	0.000789392	7.33907e-06	7.35461e-05	0.0104303	0.0632168	0.00071844	3.16276e-06	7.94378e-05	0.0101371	0.0589638	0.000657922	5.73586e-06	8.53799e-05	0.00977984			1.69348e+09	0.0708882	0.000841137	1.69348e+09	1.06051e-05	6.42179e-05	0.0109697	1.69348e+09	0.0688398	0.000789315	1.69348e+09	7.32209e-06	7.33974e-05	0.010429	1.69348e+09	0.0631844	0.000718133	1.69348e+09	3.40723e-06	7.96526e-05	0.0101469	1.69348e+09	0.0589449	0.000657675	1.69348e+09	5.67949e-06
	12	0.0716662	0.000855741	1.05372e-05	6.39081e-05	0.0110521	0.0690857	0.000788315	9.09735e-06	6.91315e-05	0.0103763	0.0627365	0.000716304	7.71056e-06	7.98218e-05	0.0101807	0.058565	0.000653139	7.07192e-06	7.99809e-05	0.00976475			1.69348e+09	0.0716725	0.000855734	1.69348e+09	1.06062e-05	6.3913e-05	0.0110533	1.69348e+09	0.0690734	0.000788157	1.69348e+09	9.13755e-06	6.90843e-05	0.0103769	1.69348e+09	0.0627055	0.000716197	1.69348e+09	7.71525e-06	7.96889e-05	0.0101935	1.69348e+09	0.0585494	0.000653057	1.69348e+09	7.12428e-06
	13	0.0711629	0.000840047	1.39108e-05	6.44431e-05	0.0109097	0.0682298	0.00078052	9.30267e-06	7.08897e-05	0.0103922	0.0617021	0.000712436	3.38394e-06	7.22204e-05	0.0102887	0.0582264	0.000653502	8.2938e-06	7.79508e-05	0.0098278			1.69348e+09	0.071133	0.00083965	1.69348e+09	1.38054e-05	6.44241e-05	0.010911	1.69348e+09	0.0682123	0.0007805	1.69348e+09	9.29735e-06	7.08491e-05	0.0103957	1.69348e+09	0.06168	0.000712247	1.69348e+09	3.2492e-06	7.20576e-05	0.010299	1.69348e+09	0.0582144	0.000653349	1.69348e+09	8.28884e-06
	14	0.0702064	0.00083343	5.56645e-06	6.28751e-05	0.0109641	0.0682343	0.000787152	8.83765e-06	6.6851e-05	0.0104887	0.0616547	0.000705663	1.35113e-06	7.09788e-05	0.0101867	0.0580026	0.000644848	6.82957e-06	8.00157e-05	0.00971649			1.69348e+09	0.0701856	0.000833081	1.69348e+09	5.48366e-06	6.2861e-05	0.0109647	1.69348e+09	0.0682135	0.000787122	1.69348e+09	8.84853e-06	6.68348e-05	0.0104926	1.69348e+09	0.0616746	0.000705703	1.69348e+09	1.308e-06	7.11128e-05	0.0101937	1.69348e+09	0.0579819	0.000644552	1.69348e+09	6.90983e-06
	15	0.0705869	0.000828945	1.16182e-05	6.39925e-05	0.0108415	0.067653	0.00077955	9.60405e-06	7.03739e-05	0.0104665	0.0622526	0.000713698	2.18958e-06	7.64898e-05	0.010218	0.0576551	0.000644086	1.05162e-05	8.07797e-05	0.00976186			1.69348e+09	0.070623	0.000830065	1.69348e+09	1.17622e-05	6.40427e-05	0.0108541	1.69348e+09	0.0676221	0.000779206	1.69348e+09	9.54956e-06	7.05075e-05	0.0104673	1.69348e+09	0.0622774	0.000713907	1.69348e+09	2.32803e-06	7.65897e-05	0.0102268	1.69348e+09	0.0576492	0.000644117	1.69348e+09	1.05564e-05
	16	0.0719701	0.000896405	1.26022e-05	6.56971e-05	0.0115705	0.0667737	0.000768462	6.266e-06	7.41085e-05	0.0104383	0.0628277	0.000717036	8.1158e-06	7.65994e-05	0.0101776	0.0577175	0.000646585	8.73081e-06	8.12555e-05	0.00979459			1.69348e+09	0.0720107	0.000896999	1.69348e+09	1.25219e-05	6.56635e-05	0.0115745	1.69348e+09	0.0667794	0.000768494	1.69348e+09	6.19707e-06	7.40753e-05	0.0104389	1.69348e+09	0.0628357	0.000716875	1.69348e+09	8.15367e-06	7.65714e-05	0.0101832	1.69348e+09	0.0577229	0.0006466	1.69348e+09	8.70348e-06
	17	0.0725692	0.000862329	7.69484e-06	6.21052e-05	0.0110054	0.0679226	0.000781303	6.35091e-06	6.85699e-05	0.0104507	0.0626299	0.00070492	4.04005e-06	7.49159e-05	0.0100163	0.0579189	0.000644937	9.22605e-06	7.96858e-05	0.00973206			1.69348e+09	0.0725453	0.000860499	1.69348e+09	7.44327e-06	6.20774e-05	0.010986	1.69348e+09	0.0679802	0.000781648	1.69348e+09	6.42398e-06	6.84448e-05	0.0104481	1.69348e+09	0.0626282	0.000704745	1.69348e+09	4.04446e-06	7.48431e-05	0.0100232	1.69348e+09	0.0579145	0.000644696	1.69348e+09	9.46203e-06
	18	0.0713077	0.000838089	5.63609e-06	6.48101e-05	0.0108601	0.0683675	0.000779475	8.28948e-06	7.01196e-05	0.010356	0.062782	0.000711433	8.23811e-06	7.4281e-05	0.0100957	0.0575953	0.000638927	1.52653e-05	8.39738e-05	0.0096824			1.69348e+09			1.69348e+09				1.69348e+09			1.69348e+09				1.69348e+09			1.69348e+09				1.69348e+09			1.69348e+09
	Cup	C	H3	C	H3		C	H3	C	H3		C	H3	C	H3		C	H3	C	H3
	Info	tbdgy	tbdgy	tbdgy	tbdgy		tbdgy	tbdgy	tbdgy	tbdgy		tbdgy	tbdgy	tbdgy	tbdgy		tbdgy	tbdgy	tbdgy	tbdgy
	Mean	0.0714802	0.000852265	8.90883e-06	6.37754e-05		0.0686473	0.0007934	8.38631e-06	7.15487e-05		0.0631514	0.000723494	6.10713e-06	7.76643e-05		0.0591718	0.000662831	9.11426e-06	8.13548e-05			Mean		0.0715017	0.000852397		8.96534e-06	6.36162e-05			0.0685941	0.000792676		8.11473e-06	7.14722e-05			0.0630787	0.000722836		5.18084e-06	7.70606e-05			0.0591583	0.000662885		8.84807e-06
	StdErr (%)	0.251387	0.451373	6.81843	0.712786		0.265219	0.401979	7.46279	0.983561		0.339331	0.387719	17.4292	1.38299		0.454707	0.579801	8.04183	0.670761
		isotope ratio (blank corrected)		30/29				not-blank corr																isotope ratio (blank corrected)		30/29				not-blank corr
		1		0.0110318				0.0119231																1		0.0110325				0.0119214
		2		0.010516				0.0115576																2		0.0105149				0.011556
		3		0.0102274				0.0114565																3		0.0102383				0.0114593
		4		0.00982697		29/30		0.0112018																4		0.00983115				0.0112053
		average		0.0104005	V/V	96.1489		0.0115348																average		0.0104042	V/V			0.0115355	V/V
				0.0243673				0.0129633																		0.0242343				0.0128621
			S1	0.0422054	urel			0.0224531																	S1	0.041975	urel			0.0222778
		IDMS blend (bx)
		idms_01		bl_05		30Si/29Si-corr_01	idms_02		bl_06		30Si/29Si-corr_02	idms_03		bl_07		30Si/29Si-corr_03	idms_04		bl_08		30Si/29Si-corr_04			idms_01			bl_05			30Si/29Si-corr_01	idms_02			bl_06			30Si/29Si-corr_02	idms_03			bl_07			30Si/29Si-corr_03	idms_04			bl_08
	Cycle	29.079	30.091	29.079	30.091		29.079	30.091	29.079	30.091		29.079	30.091	29.079	30.091		29.079	30.091	29.079	30.091				time	29.078	30.09	time	29.078	30.09		time	29.078	30.09	time	29.078	30.09		time	29.078	30.09	time	29.078	30.09		time	29.078	30.09	time	29.078
	1	0.0336944	0.128781	4.60431e-06	8.82809e-05	3.8202	0.0325295	0.124275	7.10559e-06	8.51246e-05	3.81889	0.030831	0.117914	3.39093e-06	9.34168e-05	3.82231	0.0293863	0.112447	2.62981e-05	0.000130267	3.82437			1.69348e+09			1.69348e+09				1.69348e+09			1.69348e+09				1.69348e+09			1.69348e+09				1.69349e+09			1.69349e+09
	2	0.0337679	0.129015	3.38417e-06	9.11139e-05	3.8188	0.0325668	0.124465	1.88235e-06	8.91757e-05	3.82034	0.0306597	0.11719	4.52123e-06	8.7213e-05	3.82008	0.0293581	0.112326	9.86069e-06	9.67027e-05	3.82393			1.69348e+09	0.0337625	0.128999	1.69348e+09	3.34424e-06	9.10163e-05	3.81893	1.69348e+09	0.0325671	0.124468	1.69348e+09	1.95681e-06	8.92472e-05	3.82043	1.69348e+09	0.0306561	0.117178	1.69348e+09	4.70542e-06	8.69871e-05	3.82016	1.69349e+09	0.0293603	0.112331	1.69349e+09	9.07959e-06
	3	0.0335452	0.128252	3.4985e-06	8.51717e-05	3.82141	0.032536	0.124366	9.16749e-06	8.74053e-05	3.82091	0.0307315	0.117532	8.49126e-06	8.62195e-05	3.82227	0.0294484	0.112591	4.67065e-06	9.41456e-05	3.82121			1.69348e+09	0.0335317	0.128208	1.69348e+09	3.51284e-06	8.50649e-05	3.82165	1.69348e+09	0.0325386	0.124375	1.69348e+09	9.25391e-06	8.73979e-05	3.82093	1.69348e+09	0.0307382	0.117555	1.69348e+09	8.4483e-06	8.62316e-05	3.82222	1.69349e+09	0.0294502	0.112597	1.69349e+09	4.59432e-06
	4	0.0331328	0.126642	4.08479e-06	8.51105e-05	3.82039	0.0326887	0.124976	5.96159e-06	8.87735e-05	3.82174	0.0309827	0.118498	2.42282e-06	8.78916e-05	3.82245	0.0294424	0.11264	6.25841e-06	8.67366e-05	3.82366			1.69348e+09	0.0331128	0.126576	1.69348e+09	4.08829e-06	8.51509e-05	3.8207	1.69348e+09	0.032684	0.124961	1.69348e+09	5.88807e-06	8.87199e-05	3.82186	1.69348e+09	0.030984	0.118502	1.69348e+09	2.3597e-06	8.78224e-05	3.82245	1.69349e+09	0.0294455	0.112652	1.69349e+09	6.3105e-06
	5	0.032599	0.124627	3.66944e-06	8.74384e-05	3.82111	0.03231	0.123521	5.69747e-06	8.44944e-05	3.82152	0.0307931	0.117773	5.40768e-06	8.23281e-05	3.82245	0.0295946	0.113235	7.12906e-06	8.69633e-05	3.8241			1.69348e+09	0.032573	0.124538	1.69348e+09	3.98051e-06	8.75801e-05	3.82146	1.69348e+09	0.0322677	0.12338	1.69348e+09	5.61565e-06	8.4424e-05	3.82218	1.69348e+09	0.030762	0.117667	1.69348e+09	5.69846e-06	8.22855e-05	3.8229	1.69349e+09	0.0295857	0.113206	1.69349e+09	7.11572e-06
	6	0.0324124	0.12383	1.26984e-05	8.96282e-05	3.81853	0.0315191	0.120479	3.696e-06	8.65282e-05	3.82088	0.0301216	0.11513	1.04746e-05	8.65331e-05	3.81993	0.029198	0.111692	5.88902e-06	8.11255e-05	3.82319			1.69348e+09	0.0324354	0.123906	1.69348e+09	1.27179e-05	8.96992e-05	3.81818	1.69348e+09	0.0315	0.120416	1.69348e+09	3.70025e-06	8.65257e-05	3.82122	1.69348e+09	0.0301077	0.115084	1.69348e+09	1.04298e-05	8.65703e-05	3.82017	1.69349e+09	0.0291845	0.111647	1.69349e+09	5.79126e-06
	7	0.0336829	0.128765	4.62228e-06	9.1432e-05	3.82102	0.0313732	0.119953	5.90498e-06	8.43535e-05	3.82188	0.0301388	0.115251	3.21508e-06	8.44176e-05	3.82175	0.0289361	0.110698	2.35347e-06	8.88116e-05	3.82344			1.69348e+09	0.03371	0.128858	1.69348e+09	4.48719e-06	9.13586e-05	3.82072	1.69348e+09	0.0313886	0.120006	1.69348e+09	6.01081e-06	8.42519e-05	3.82171	1.69348e+09	0.0301481	0.115283	1.69348e+09	3.00839e-06	8.44369e-05	3.82165	1.69349e+09	0.0289393	0.110711	1.69349e+09	2.39599e-06
	8	0.0336908	0.128874	6.09971e-06	8.55026e-05	3.82337	0.0322715	0.123432	8.86626e-06	8.08179e-05	3.8233	0.03056	0.11686	3.76312e-07	8.76154e-05	3.82174	0.0293561	0.11241	7.96577e-06	8.39324e-05	3.82705			1.69348e+09	0.0336876	0.128866	1.69348e+09	6.32451e-06	8.5413e-05	3.8235	1.69348e+09	0.0323089	0.123559	1.69348e+09	8.94923e-06	8.07507e-05	3.82283	1.69348e+09	0.0305692	0.116893	1.69348e+09	3.15097e-07	8.77036e-05	3.82167	1.69349e+09	0.029379	0.112489	1.69349e+09	8.03708e-06
	9	0.0335928	0.128503	1.08469e-05	8.85772e-05	3.82347	0.0324074	0.123982	8.2023e-06	8.22126e-05	3.82424	0.0303937	0.116286	1.52004e-06	8.72268e-05	3.82376	0.0295703	0.113212	4.32799e-06	8.23846e-05	3.82644			1.69348e+09	0.0335899	0.128494	1.69348e+09	1.07897e-05	8.86169e-05	3.82352	1.69348e+09	0.032392	0.123931	1.69348e+09	8.24516e-06	8.23938e-05	3.8245	1.69348e+09	0.0303795	0.116239	1.69348e+09	1.54498e-06	8.71542e-05	3.82401	1.69349e+09	0.0295582	0.11317	1.69349e+09	4.20876e-06
	10	0.03355	0.128346	3.39928e-06	8.76617e-05	3.82366	0.0315446	0.120639	1.08891e-05	9.06655e-05	3.82286	0.0298665	0.114199	1.55327e-06	8.36694e-05	3.82138	0.0287871	0.110173	2.14147e-06	8.50204e-05	3.825			1.69348e+09	0.0335449	0.128328	1.69348e+09	3.28449e-06	8.76114e-05	3.8237	1.69348e+09	0.0315209	0.12056	1.69348e+09	1.07407e-05	9.06858e-05	3.82326	1.69348e+09	0.0298513	0.114147	1.69348e+09	1.71755e-06	8.36924e-05	3.82161	1.69349e+09	0.0287693	0.110112	1.69349e+09	2.17643e-06
	11	0.033345	0.127478	5.42879e-06	8.58402e-05	3.82112	0.0312864	0.119689	1.19999e-06	8.33167e-05	3.82404	0.0296525	0.113381	9.2736e-06	8.84779e-05	3.82138	0.0287312	0.109911	6.03595e-06	8.42722e-05	3.8233			1.69348e+09	0.0333186	0.127387	1.69348e+09	5.72613e-06	8.60781e-05	3.82143	1.69348e+09	0.0312692	0.119632	1.69348e+09	2.24906e-06	8.36063e-05	3.82435	1.69348e+09	0.0296448	0.113355	1.69348e+09	9.32602e-06	8.86558e-05	3.82152	1.69349e+09	0.0287134	0.109851	1.69349e+09	6.05282e-06
	12	0.0328164	0.125444	1.16327e-05	9.52454e-05	3.82071	0.0310673	0.118819	3.9938e-05	9.98947e-05	3.82302	0.0296541	0.113372	3.00473e-06	8.93399e-05	3.82085	0.0282928	0.108247	2.60863e-06	8.60877e-05	3.82376			1.69348e+09	0.0327949	0.125373	1.69348e+09	1.18475e-05	9.5409e-05	3.82104	1.69348e+09	0.0310675	0.118819	1.69348e+09	4.01369e-05	9.99951e-05	3.82303	1.69348e+09	0.0296746	0.113441	1.69348e+09	2.93116e-06	8.92934e-05	3.82057	1.69349e+09	0.0282805	0.108207	1.69349e+09	2.57117e-06
	13	0.0322955	0.123448	1.55653e-05	9.47249e-05	3.82052	0.0312978	0.119705	1.09142e-05	8.8774e-05	3.82318	0.0306215	0.117149	5.67991e-06	8.58656e-05	3.82349	0.028131	0.107611	4.26772e-06	8.58744e-05	3.82311			1.69348e+09	0.0322876	0.123421	1.69348e+09	1.55108e-05	9.46621e-05	3.82064	1.69348e+09	0.0313171	0.11977	1.69348e+09	1.02844e-05	8.8565e-05	3.82291	1.69348e+09	0.0306429	0.117222	1.69348e+09	5.8955e-06	8.59347e-05	3.82323	1.69349e+09	0.0281326	0.107617	1.69349e+09	4.33024e-06
	14	0.0324309	0.123946	9.05753e-06	9.18345e-05	3.81993	0.0320147	0.122444	9.1659e-06	8.85413e-05	3.82311	0.0306662	0.117357	1.35364e-05	9.32259e-05	3.82469	0.0283725	0.108589	5.55988e-06	8.01244e-05	3.82506			1.69348e+09	0.032456	0.12403	1.69348e+09	8.71117e-06	9.15541e-05	3.81957	1.69348e+09	0.0320434	0.122541	1.69348e+09	8.9528e-06	8.83625e-05	3.82273	1.69348e+09	0.0306623	0.117345	1.69348e+09	1.36633e-05	9.33917e-05	3.82482	1.69349e+09	0.0283767	0.108604	1.69349e+09	5.74453e-06
	15	0.0329903	0.126125	5.9744e-06	8.57892e-05	3.82119	0.0320925	0.122784	5.01343e-06	8.30737e-05	3.82443	0.0305146	0.116781	9.19249e-06	9.11499e-05	3.82483	0.0282493	0.108104	9.38069e-06	8.63856e-05	3.82455			1.69348e+09	0.0330096	0.126189	1.69348e+09	5.95102e-06	8.56486e-05	3.82091	1.69348e+09	0.0320932	0.122787	1.69348e+09	5.26887e-06	8.3175e-05	3.82447	1.69348e+09	0.0305066	0.116753	1.69348e+09	8.92314e-06	9.09526e-05	3.82494	1.69349e+09	0.028265	0.108156	1.69349e+09	9.38027e-06
	16	0.0333375	0.127425	7.91542e-06	8.39314e-05	3.82041	0.0320507	0.122611	2.12225e-05	9.42378e-05	3.82401	0.0302744	0.115796	8.21769e-07	8.25098e-05	3.82263	0.0291113	0.11141	5.54e-06	8.53884e-05	3.82487			1.69348e+09	0.0333438	0.127447	1.69348e+09	7.86491e-06	8.39821e-05	3.82034	1.69348e+09	0.0320466	0.122597	1.69348e+09	2.15367e-05	9.43359e-05	3.82411	1.69348e+09	0.0302714	0.115784	1.69348e+09	6.76263e-07	8.24095e-05	3.82266	1.69349e+09	0.0291323	0.111479	1.69349e+09	5.4532e-06
	17	0.0332871	0.127297	3.50677e-06	8.86383e-05	3.82234	0.0318987	0.122043	1.98478e-05	8.85893e-05	3.82446	0.030364	0.116129	2.32361e-06	8.57016e-05	3.82234	0.0292405	0.111878	5.28385e-06	8.56129e-05	3.82399			1.69348e+09	0.0332806	0.127276	1.69348e+09	3.4384e-06	8.85246e-05	3.82247	1.69348e+09	0.0318971	0.122037	1.69348e+09	1.94454e-05	8.84951e-05	3.82448	1.69348e+09	0.0303653	0.116136	1.69348e+09	2.51198e-06	8.58562e-05	3.82242	1.69349e+09	0.0292406	0.11188	1.69349e+09	5.28451e-06
	18	0.0331581	0.126759	6.02227e-06	8.03056e-05	3.821	0.0320075	0.122414	1.00783e-05	9.12335e-05	3.82302	0.0303103	0.116012	6.03755e-06	8.7438e-05	3.82524	0.0291156	0.111476	5.55829e-06	8.24273e-05	3.82659			1.69348e+09			1.69348e+09				1.69348e+09			1.69348e+09				1.69348e+09			1.69348e+09				1.69349e+09			1.69349e+09
	Cup	C	H3	C	H3		C	H3	C	H3		C	H3	C	H3		C	H3	C	H3
	Info	tbdgy	tbdgy	tbdgy	tbdgy		tbdgy	tbdgy	tbdgy	tbdgy		tbdgy	tbdgy	tbdgy	tbdgy		tbdgy	tbdgy	tbdgy	tbdgy
	Mean	0.033185	0.126864	6.77839e-06	8.81237e-05		0.0319701	0.122255	1.02641e-05	8.76229e-05		0.0303965	0.116256	5.06907e-06	8.72355e-05		0.0290179	0.111036	6.72943e-06	8.8459e-05			Mean		0.0331524	0.126743		6.97373e-06	8.85856e-05			0.0319314	0.122115		1.05147e-05	8.75582e-05			0.0303727	0.116162		5.13469e-06	8.68361e-05			0.0289883	0.110919		5.5329e-06
	StdErr (%)	0.347484	0.35098	12.875	1.01625		0.375441	0.371915	20.7902	1.24859		0.30245	0.305517	17.4384	0.851475		0.3906	0.391408	18.6571	2.98536
		isotope ratio (blank corrected)		30/29				not-blank corr																isotope ratio (blank corrected)		30/29				not-blank corr
		1		3.82106				3.82295																1		3.82117				3.82305
		2		3.82255				3.82405																2		3.82281				3.82429
		3		3.82242				3.82466																3		3.82231				3.82453
		4		3.82431				3.82648																4		3.8241				3.82634
		average		3.82259	V/V			3.82453																average		3.8226	V/V			3.82455	V/V
				0.000174265				0.000193006																		0.000158693				0.000177476
			S1	0.000301836	urel			0.000334297																	S1	0.000274865	urel			0.000307398
		material w (WASO04)				material: WASO04 41963/04/72-75 part Mi 2.08
		waso_01		bl_09		30Si/29Si-corr_01	waso_02		bl_10		30Si/29Si-corr_02	waso_03		bl_11		30Si/29Si-corr_03	waso_04		bl_12		30Si/29Si-corr_04			waso_01			bl_09			30Si/29Si-corr_01	waso_02			bl_10			30Si/29Si-corr_02	waso_03			bl_11			30Si/29Si-corr_03	waso_04			bl_12
	Cycle	29.079	30.091	29.079	30.091		29.079	30.091	29.079	30.091		29.079	30.091	29.079	30.091		29.079	30.091	29.079	30.091				time	29.078	30.09	time	29.078	30.09		time	29.078	30.09	time	29.078	30.09		time	29.078	30.09	time	29.078	30.09		time	29.078	30.09	time	29.078
	1	0.127029	0.0896316	2.88635e-06	8.33836e-05	0.704936	0.113289	0.0799416	1.32796e-05	9.77341e-05	0.704863	0.113285	0.0799227	2.06053e-05	9.56347e-05	0.704786	0.10929	0.0771423	1.70598e-05	9.60561e-05	0.705106			1.69349e+09			1.69349e+09				1.69349e+09			1.69349e+09				1.69349e+09			1.69349e+09				1.69349e+09			1.69349e+09
	2	0.126033	0.0889236	2.94884e-06	8.17023e-05	0.704887	0.111104	0.0784099	1.11923e-05	8.99177e-05	0.704937	0.112815	0.079613	1.60505e-05	9.16243e-05	0.704973	0.108972	0.0769263	1.46311e-05	9.72683e-05	0.705181			1.69349e+09	0.125993	0.0888988	1.69349e+09	2.88032e-06	8.19777e-05	0.704912	1.69349e+09	0.110964	0.0783234	1.69349e+09	1.12192e-05	8.97735e-05	0.705048	1.69349e+09	0.112742	0.079569	1.69349e+09	1.59872e-05	9.1576e-05	0.705038	1.69349e+09	0.109041	0.0769695	1.69349e+09	1.47424e-05
	3	0.12592	0.08884	9.89026e-07	9.21593e-05	0.704856	0.109389	0.0771855	1.40246e-05	9.31386e-05	0.704798	0.11126	0.0785207	1.88526e-05	9.40978e-05	0.705007	0.111188	0.078519	2.01432e-05	9.48778e-05	0.705452			1.69349e+09	0.125836	0.0887886	1.69349e+09	9.66711e-07	9.23e-05	0.704916	1.69349e+09	0.109448	0.0772215	1.69349e+09	1.40439e-05	9.31426e-05	0.704742	1.69349e+09	0.111206	0.0784873	1.69349e+09	1.87604e-05	9.40952e-05	0.705051	1.69349e+09	0.111254	0.0785586	1.69349e+09	2.02127e-05
	4	0.121927	0.0860316	1.89575e-06	8.9345e-05	0.704907	0.113995	0.0804339	1.21354e-05	9.01329e-05	0.704819	0.110152	0.0777388	1.15444e-05	9.14758e-05	0.705005	0.112067	0.0790807	1.79095e-05	9.59563e-05	0.704929			1.69349e+09	0.121867	0.0859952	1.69349e+09	1.7715e-06	8.92092e-05	0.704957	1.69349e+09	0.114101	0.0804991	1.69349e+09	1.21375e-05	9.01439e-05	0.704732	1.69349e+09	0.110138	0.0777305	1.69349e+09	1.14951e-05	9.14373e-05	0.705014	1.69349e+09	0.112086	0.079091	1.69349e+09	1.78881e-05
	5	0.122959	0.0867926	-4.87482e-06	8.47826e-05	0.705181	0.114565	0.0808526	1.41296e-05	9.37406e-05	0.704965	0.110613	0.0780532	1.6443e-05	9.19322e-05	0.704908	0.112053	0.0790813	1.91365e-05	9.24428e-05	0.705028			1.69349e+09	0.123118	0.0868925	1.69349e+09	-4.75738e-06	8.48742e-05	0.705077	1.69349e+09	0.114603	0.080877	1.69349e+09	1.41636e-05	9.38488e-05	0.704942	1.69349e+09	0.110611	0.0780522	1.69349e+09	1.65999e-05	9.19443e-05	0.70491	1.69349e+09	0.112007	0.079054	1.69349e+09	1.90463e-05
	6	0.126345	0.0892143	5.14773e-06	9.22645e-05	0.705451	0.11504	0.081211	1.30776e-05	9.35804e-05	0.705168	0.110098	0.0777067	1.58893e-05	9.1861e-05	0.705058	0.110802	0.0782098	1.541e-05	9.06847e-05	0.705123			1.69349e+09	0.126342	0.0892128	1.69349e+09	5.27635e-06	9.2347e-05	0.70545	1.69349e+09	0.115027	0.0812031	1.69349e+09	1.31066e-05	9.35952e-05	0.705178	1.69349e+09	0.110177	0.0777558	1.69349e+09	1.59529e-05	9.19196e-05	0.704994	1.69349e+09	0.110833	0.0782289	1.69349e+09	1.53925e-05
	7	0.122854	0.0867084	1.40843e-06	8.94186e-05	0.705101	0.113931	0.0804268	1.54992e-05	9.45703e-05	0.705149	0.114367	0.0807217	1.94458e-05	9.51112e-05	0.7051	0.113577	0.0801547	1.82775e-05	9.35593e-05	0.70502			1.69349e+09	0.122786	0.086666	1.69349e+09	1.3911e-06	8.93385e-05	0.705143	1.69349e+09	0.113895	0.0804041	1.69349e+09	1.54257e-05	9.45612e-05	0.705169	1.69349e+09	0.114481	0.0807912	1.69349e+09	1.94651e-05	9.51099e-05	0.705005	1.69349e+09	0.113638	0.0801928	1.69349e+09	1.84343e-05
	8	0.123035	0.0868321	4.30095e-06	8.77618e-05	0.705064	0.113342	0.0799784	9.60567e-06	9.30725e-05	0.70486	0.115473	0.0814822	1.67968e-05	9.17937e-05	0.704932	0.113824	0.0803509	2.30706e-05	9.91767e-05	0.705209			1.69349e+09	0.12307	0.0868539	1.69349e+09	4.40858e-06	8.77258e-05	0.705041	1.69349e+09	0.113318	0.0799631	1.69349e+09	9.54929e-06	9.2873e-05	0.704872	1.69349e+09	0.115497	0.0814972	1.69349e+09	1.6669e-05	9.17886e-05	0.704917	1.69349e+09	0.113855	0.0803706	1.69349e+09	2.30273e-05
	9	0.123811	0.0874014	4.38872e-06	8.82716e-05	0.705244	0.113263	0.0799393	1.3938e-05	8.8212e-05	0.705006	0.115017	0.0811985	1.59072e-05	9.49498e-05	0.705265	0.114417	0.0807825	1.70795e-05	9.52748e-05	0.705327			1.69349e+09	0.123895	0.0874531	1.69349e+09	4.27496e-06	8.81566e-05	0.705184	1.69349e+09	0.113313	0.0799702	1.69349e+09	1.39421e-05	8.81477e-05	0.704966	1.69349e+09	0.115036	0.0812107	1.69349e+09	1.59261e-05	9.4946e-05	0.705249	1.69349e+09	0.114411	0.0807779	1.69349e+09	1.70654e-05
	10	0.12698	0.0896413	-1.06892e-06	8.15155e-05	0.705286	0.115769	0.0817162	9.80497e-06	8.94546e-05	0.705092	0.116401	0.0821458	1.77216e-05	9.15756e-05	0.705018	0.113557	0.0801027	2.23841e-05	8.98718e-05	0.704681			1.69349e+09	0.127049	0.0896832	1.69349e+09	-1.08843e-06	8.1496e-05	0.70523	1.69349e+09	0.115802	0.0817356	1.69349e+09	9.598e-06	8.94106e-05	0.705057	1.69349e+09	0.11645	0.0821752	1.69349e+09	1.75834e-05	9.15331e-05	0.704973	1.69349e+09	0.113555	0.0801002	1.69349e+09	2.23922e-05
	11	0.12708	0.0896786	3.46774e-06	8.7209e-05	0.705022	0.114856	0.0810292	3.82639e-06	8.57411e-05	0.704718	0.11733	0.0827927	9.15456e-06	9.25587e-05	0.704948	0.114286	0.0806455	1.74722e-05	9.26622e-05	0.704939			1.69349e+09	0.127055	0.089663	1.69349e+09	3.75649e-06	8.7371e-05	0.705037	1.69349e+09	0.114837	0.0810173	1.69349e+09	3.60975e-06	8.57261e-05	0.704725	1.69349e+09	0.117341	0.0827982	1.69349e+09	9.03413e-06	9.26589e-05	0.704924	1.69349e+09	0.114342	0.0806809	1.69349e+09	1.72539e-05
	12	0.126285	0.0891441	6.92637e-06	8.6678e-05	0.705228	0.115255	0.0813382	3.80603e-06	8.89783e-05	0.704959	0.116724	0.0823214	1.43868e-05	9.47679e-05	0.704566	0.115126	0.0812317	1.63393e-05	8.77207e-05	0.704884			1.69349e+09	0.126284	0.0891442	1.69349e+09	6.8397e-06	8.6633e-05	0.705232	1.69349e+09	0.115209	0.0813106	1.69349e+09	7.62231e-06	9.20854e-05	0.704994	1.69349e+09	0.116717	0.082317	1.69349e+09	1.44819e-05	9.46892e-05	0.704569	1.69349e+09	0.115144	0.0812432	1.69349e+09	1.62779e-05
	13	0.127041	0.0896853	-7.65912e-07	8.46806e-05	0.705294	0.112705	0.0795301	0.000183942	0.000254546	0.704863	0.116989	0.0825449	1.37987e-05	8.81341e-05	0.704883	0.115128	0.0812735	1.44763e-05	9.58344e-05	0.705234			1.69349e+09	0.127065	0.0896993	1.69349e+09	-8.02204e-07	8.46218e-05	0.705267	1.69349e+09	0.112704	0.0795296	1.69349e+09	0.000187508	0.000257186	0.704865	1.69349e+09	0.117	0.0825524	1.69349e+09	1.37864e-05	8.80029e-05	0.704879	1.69349e+09	0.115085	0.0812465	1.69349e+09	1.45093e-05
	14	0.127486	0.0899352	5.15362e-06	8.33706e-05	0.704788	0.115176	0.0813116	0.000172086	0.000232402	0.705213	0.117267	0.0827434	1.37877e-05	8.73859e-05	0.704902	0.113067	0.0797642	1.79546e-05	9.49805e-05	0.704745			1.69349e+09	0.127484	0.0899336	1.69349e+09	5.47841e-06	8.3444e-05	0.704786	1.69349e+09	0.115303	0.0813912	1.69349e+09	0.000166653	0.00022809	0.705119	1.69349e+09	0.117282	0.0827524	1.69349e+09	1.38829e-05	8.75871e-05	0.70489	1.69349e+09	0.112952	0.0796939	1.69349e+09	1.80898e-05
	15	0.126982	0.0896356	8.22776e-06	8.70209e-05	0.705226	0.116239	0.0820698	3.34855e-05	0.000117129	0.705288	0.117395	0.0828325	1.64336e-05	9.45463e-05	0.704898	0.111949	0.0790329	1.82196e-05	9.41197e-05	0.705246			1.69349e+09	0.126936	0.0896081	1.69349e+09	8.1313e-06	8.70556e-05	0.705266	1.69349e+09	0.116243	0.0820724	1.69349e+09	3.01519e-05	0.000114622	0.70528	1.69349e+09	0.117354	0.0828075	1.69349e+09	1.63348e-05	9.45765e-05	0.704928	1.69349e+09	0.111991	0.0790594	1.69349e+09	1.82655e-05
	16	0.125299	0.088441	5.99999e-07	8.52553e-05	0.705168	0.11538	0.081454	9.23015e-06	9.1443e-05	0.705199	0.115347	0.0813839	9.12498e-06	8.9026e-05	0.704851	0.115125	0.0812531	2.01216e-05	9.70877e-05	0.705076			1.69349e+09	0.125264	0.0884199	1.69349e+09	4.74039e-07	8.51186e-05	0.705191	1.69349e+09	0.115384	0.0814558	1.69349e+09	8.68774e-06	9.10488e-05	0.705184	1.69349e+09	0.115264	0.0813326	1.69349e+09	9.16069e-06	8.90137e-05	0.704915	1.69349e+09	0.115165	0.0812763	1.69349e+09	2.02024e-05
	17	0.125367	0.0884876	2.2818e-06	7.95932e-05	0.705158	0.116455	0.0821702	6.98817e-06	9.49598e-05	0.704839	0.113455	0.0800452	1.8119e-05	9.38763e-05	0.704807	0.113892	0.080341	2.20303e-05	9.08432e-05	0.704705			1.69349e+09	0.125349	0.0884761	1.69349e+09	2.33644e-06	7.96069e-05	0.705164	1.69349e+09	0.116513	0.0822046	1.69349e+09	6.84801e-06	9.47365e-05	0.704781	1.69349e+09	0.113404	0.0800152	1.69349e+09	1.8262e-05	9.38665e-05	0.704858	1.69349e+09	0.113755	0.0802562	1.69349e+09	2.18812e-05
	18	0.124813	0.0880749	2.11294e-06	8.56919e-05	0.704978	0.116976	0.0825503	5.349e-06	8.43263e-05	0.704947	0.113939	0.0804287	1.3086e-05	8.87162e-05	0.705178	0.111335	0.0785488	1.5993e-05	9.1417e-05	0.704792			1.69349e+09			1.69349e+09				1.69349e+09			1.69349e+09				1.69349e+09			1.69349e+09				1.69349e+09			1.69349e+09
	Cup	C	H3	C	H3		C	H3	C	H3		C	H3	C	H3		C	H3	C	H3
	Info	tbdgy	tbdgy	tbdgy	tbdgy		tbdgy	tbdgy	tbdgy	tbdgy		tbdgy	tbdgy	tbdgy	tbdgy		tbdgy	tbdgy	tbdgy	tbdgy
	Mean	0.125403	0.0885055	2.55702e-06	8.61169e-05		0.114263	0.0806416	3.03e-05	0.000109616		0.114329	0.0806776	1.53971e-05	9.21704e-05		0.112759	0.07958	1.8206e-05	9.38797e-05			Mean		0.125337	0.0884618		2.58362e-06	8.63297e-05			0.114166	0.0805737		3.27666e-05	0.000111812			0.114419	0.0807403		1.52114e-05	9.21715e-05			0.11307	0.0798		1.84176e-05
	StdErr (%)	0.33138	0.331475	28.2729	0.958062		0.39262	0.394442	42.1345	10.6077		0.524035	0.522221	4.95329	0.650413		0.399338	0.3976	3.29626	0.745918
		isotope ratio (blank corrected)		30/29				not-blank corr																isotope ratio (blank corrected)		30/29				not-blank corr
		1		0.705099				0.705771																1		0.705116				0.70579
		2		0.704982				0.705756																2		0.704978				0.705756
		3		0.704949				0.70566																3		0.704945				0.705655
		4		0.705038				0.705756																4		0.705045				0.70576
		average		0.705017	V/V			0.705736																average		0.705021	V/V			0.705741	V/V
				4.64522e-05				3.61979e-05																		5.37204e-05				4.15897e-05
			S1	8.04575e-05	urel			6.26966e-05																	S1	9.30464e-05	urel			7.20354e-05
[truncated: 2 more columns]

## Sheet: raw data 5 seq
	raw data: sample and IDMS measurement																							tau-corrected data ->>
	sample: Si28-33Pr11 Part N.2.1																							tau correction
	Sequence 5	no rotation	10^13 Ohm																							tau constant
																								cup	C	0.6061
		sample (x, Si28)																						cup	H3	0.5266
		Si28_01		bl_01		30Si/29Si-corr_01	Si28_02		bl_02		30Si/29Si-corr_02	Si28_03		bl_03		30Si/29Si-corr_03	Si28_04		bl_04		30Si/29Si-corr_04			Si28_01			bl_01			30Si/29Si-corr_01	Si28_02			bl_02			30Si/29Si-corr_02	Si28_03			bl_03			30Si/29Si-corr_03	Si28_04			bl_04
	Cycle	29.078	30.09	29.078	30.09		29.078	30.09	29.078	30.09		29.078	30.09	29.078	30.09		29.078	30.09	29.078	30.09				time	29.078	30.09	Time	29.078	30.09		time	29.078	30.09	time	29.078	30.09		time	29.078	30.09	time	29.078	30.09		time	29.078	30.09	time	29.078
	1	0.0545209	0.000685997	2.46644e-05	7.75699e-05	0.0112147	0.0502629	0.000623011	2.21744e-05	8.91601e-05	0.0106434	0.0458191	0.00054402	1.85535e-05	9.22275e-05	0.00993381	0.0400902	0.000468807	1.08632e-05	9.36805e-05	0.00945019			1.69355e+09			1.69355e+09				1.69355e+09			1.69355e+09				1.69355e+09			1.69355e+09				1.69355e+09			1.69355e+09
	2	0.0546289	0.000687224	1.90294e-05	7.45588e-05	0.011215	0.0503073	0.000613649	1.61285e-05	8.60583e-05	0.0104478	0.0458437	0.000596677	1.66219e-05	9.51432e-05	0.0110775	0.0401824	0.000470867	1.71525e-05	9.10303e-05	0.00947977			1.69355e+09	0.0546316	0.000687224	1.69355e+09	1.89248e-05	7.45198e-05	0.0112193	1.69355e+09	0.0503044	0.000613355	1.69355e+09	1.60395e-05	8.59574e-05	0.0104837	1.69355e+09	0.0458367	0.000597115	1.69355e+09	1.65864e-05	9.5077e-05	0.0110876	1.69355e+09	0.040182	0.000470905	1.69355e+09	1.72998e-05
	3	0.0545954	0.000686011	1.95566e-05	7.53783e-05	0.0111996	0.0501828	0.000613626	1.97116e-05	8.59422e-05	0.0104733	0.0456264	0.000557973	1.75729e-05	9.01183e-05	0.0102817	0.0400768	0.000470009	1.49424e-05	8.97771e-05	0.00948336			1.69355e+09	0.0545919	0.000685876	1.69355e+09	1.9674e-05	7.53946e-05	0.0112028	1.69355e+09	0.0501742	0.000613616	1.69355e+09	1.96817e-05	8.59501e-05	0.0105161	1.69355e+09	0.045615	0.000556896	1.69355e+09	1.76311e-05	8.9988e-05	0.0102595	1.69355e+09	0.0400708	0.000469961	1.69355e+09	1.48551e-05
	4	0.0544556	0.000679644	2.47654e-05	7.5473e-05	0.0111114	0.0498888	0.000613047	1.46647e-05	8.65182e-05	0.0105234	0.0452831	0.000536123	1.93682e-05	8.80636e-05	0.00987697	0.0398932	0.000468193	1.27464e-05	9.38814e-05	0.00948148			1.69355e+09	0.0544333	0.00067926	1.69355e+09	2.48046e-05	7.54728e-05	0.0111138	1.69355e+09	0.0498724	0.000613172	1.69355e+09	1.46253e-05	8.65005e-05	0.0105709	1.69355e+09	0.0452736	0.000535675	1.69355e+09	1.92055e-05	8.80721e-05	0.009868	1.69355e+09	0.0398868	0.000468115	1.69355e+09	1.27834e-05
	5	0.053506	0.000664439	2.064e-05	7.53745e-05	0.0110244	0.0493813	0.00062063	1.77854e-05	8.49138e-05	0.0107853	0.0451619	0.000532776	9.89614e-06	9.05826e-05	0.00982935	0.0397627	0.000465631	1.68088e-05	8.91645e-05	0.00944813			1.69355e+09	0.0534557	0.000664158	1.69355e+09	2.04587e-05	7.53659e-05	0.0110345	1.69355e+09	0.0493515	0.00062038	1.69355e+09	1.79636e-05	8.49534e-05	0.0108286	1.69355e+09	0.0451613	0.000532748	1.69355e+09	9.51521e-06	9.0435e-05	0.00982772	1.69355e+09	0.0397514	0.000465306	1.69355e+09	1.66972e-05
	6	0.0530649	0.000670667	1.59123e-05	7.49886e-05	0.0112335	0.0490632	0.000605075	1.96004e-05	8.77796e-05	0.010538	0.0452656	0.000535232	8.82042e-06	8.33591e-05	0.00986109	0.0395802	0.000457851	9.65414e-06	8.98456e-05	0.00929509			1.69355e+09	0.0530694	0.000670691	1.69355e+09	1.59914e-05	7.49292e-05	0.0112381	1.69355e+09	0.0490729	0.000604764	1.69355e+09	1.96043e-05	8.78881e-05	0.0105718	1.69355e+09	0.0452454	0.000535082	1.69355e+09	8.92421e-06	8.33077e-05	0.00986105	1.69355e+09	0.0395698	0.00045776	1.69355e+09	9.61649e-06
	7	0.0537238	0.000665821	2.45079e-05	7.20352e-05	0.0110055	0.049857	0.000603124	1.79755e-05	9.10154e-05	0.010331	0.044177	0.000524381	1.51379e-05	8.75954e-05	0.00985846	0.0392551	0.000460547	1.49694e-05	9.02045e-05	0.00944081			1.69355e+09	0.0537329	0.000666176	1.69355e+09	2.47166e-05	7.20772e-05	0.0110152	1.69355e+09	0.0498714	0.000603045	1.69355e+09	1.79055e-05	9.09599e-05	0.010368	1.69355e+09	0.044158	0.000524144	1.69355e+09	1.55839e-05	8.78535e-05	0.00985616	1.69356e+09	0.0392468	0.000460578	1.69355e+09	1.50197e-05
	8	0.0535104	0.000690607	2.16901e-05	7.63285e-05	0.0115127	0.0497672	0.000600663	1.61804e-05	8.46589e-05	0.0103002	0.0443365	0.000521891	3.13435e-05	9.8366e-05	0.00976681	0.0391717	0.000459548	1.21092e-05	9.31736e-05	0.00943539			1.69355e+09	0.0534869	0.000690792	1.69355e+09	2.16075e-05	7.63983e-05	0.0115263	1.69355e+09	0.049765	0.000600514	1.69355e+09	1.62118e-05	8.42438e-05	0.0103393	1.69355e+09	0.0443528	0.000521742	1.69355e+09	3.17074e-05	9.87262e-05	0.00975869	1.69356e+09	0.0391707	0.00045925	1.69355e+09	1.20906e-05
	9	0.0530743	0.000671712	2.03361e-05	7.60914e-05	0.0112512	0.049795	0.000598401	1.8846e-05	7.77847e-05	0.010249	0.0446285	0.000519632	2.52146e-05	9.90753e-05	0.00965224	0.0392266	0.000451065	1.44537e-05	8.92267e-05	0.00920586			1.69355e+09	0.0530509	0.000671047	1.69355e+09	2.043e-05	7.60692e-05	0.0112487	1.69355e+09	0.0498173	0.000598391	1.69355e+09	1.88662e-05	7.76997e-05	0.0102858	1.69355e+09	0.0446258	0.000519515	1.69355e+09	2.49793e-05	9.89215e-05	0.00964905	1.69356e+09	0.0392212	0.000450907	1.69355e+09	1.44645e-05
	10	0.0523696	0.000653229	2.64325e-05	7.50418e-05	0.0110496	0.0508556	0.000600116	1.71664e-05	7.98803e-05	0.0100689	0.0442017	0.000515105	1.98462e-05	8.97202e-05	0.00964302	0.0389088	0.000450688	1.26344e-05	8.5541e-05	0.00927138			1.69355e+09	0.0523458	0.000652742	1.69355e+09	2.63693e-05	7.50349e-05	0.0110504	1.69355e+09	0.0508716	0.000600071	1.69355e+09	1.70968e-05	8.00594e-05	0.0101055	1.69355e+09	0.0441906	0.000514978	1.69355e+09	1.95404e-05	8.9505e-05	0.00964139	1.69356e+09	0.038897	0.000450565	1.69355e+09	1.26599e-05
	11	0.051911	0.000644347	1.85845e-05	7.58717e-05	0.0109761	0.0505792	0.000595832	1.54461e-05	8.78568e-05	0.0100392	0.0440686	0.00051222	1.02766e-05	8.69755e-05	0.00960668	0.038651	0.000444179	1.56999e-05	9.26031e-05	0.00916477			1.69355e+09	0.0519018	0.000643987	1.69355e+09	1.84759e-05	7.58872e-05	0.0109763	1.69355e+09	0.0505538	0.00059604	1.69355e+09	1.54341e-05	8.79052e-05	0.0100893	1.69355e+09	0.0440618	0.000512211	1.69355e+09	1.02261e-05	8.68365e-05	0.00960679	1.69356e+09	0.038638	0.000443996	1.69355e+09	1.58899e-05
	12	0.0521145	0.00064175	2.13069e-05	7.588e-05	0.0108833	0.0501505	0.00060675	1.68347e-05	8.14206e-05	0.0103429	0.0440134	0.000514826	1.84477e-05	8.52922e-05	0.00967794	0.0385504	0.000444855	1.78945e-05	9.18019e-05	0.00920625			1.69355e+09	0.0521236	0.000641773	1.69355e+09	2.12948e-05	7.58516e-05	0.010887	1.69355e+09	0.0501282	0.000606698	1.69355e+09	1.68758e-05	8.13312e-05	0.0103877	1.69355e+09	0.0440078	0.000514808	1.69355e+09	1.85585e-05	8.52834e-05	0.0096776	1.69356e+09	0.0385412	0.000444807	1.69355e+09	1.78362e-05
	13	0.0523527	0.000645624	1.80127e-05	7.43279e-05	0.0109079	0.0494915	0.000592903	1.74508e-05	8.28294e-05	0.0102007	0.0437942	0.000511234	1.55058e-05	8.64925e-05	0.00964437	0.0382034	0.000441498	1.28517e-05	9.22734e-05	0.00920198			1.69355e+09	0.0523561	0.00064575	1.69355e+09	1.7976e-05	7.39244e-05	0.0109147	1.69355e+09	0.0494769	0.000592511	1.69355e+09	1.74433e-05	8.28127e-05	0.0102377	1.69355e+09	0.0437867	0.000511214	1.69355e+09	1.54554e-05	8.65557e-05	0.00964438	1.69356e+09	0.0381958	0.000441287	1.69355e+09	1.27592e-05
	14	0.0522812	0.000648823	2.02912e-05	6.30197e-05	0.010984	0.0494404	0.000584705	1.64712e-05	8.04864e-05	0.0100454	0.0436511	0.000513714	1.6068e-05	8.87278e-05	0.00973283	0.0381804	0.000432995	1.33784e-05	8.65064e-05	0.00898475			1.69355e+09	0.0522572	0.000648563	1.69355e+09	2.0308e-05	6.30108e-05	0.0109892	1.69355e+09	0.0494363	0.00058437	1.69355e+09	1.64589e-05	8.04774e-05	0.0100813	1.69355e+09	0.043641	0.000513556	1.69355e+09	1.6031e-05	8.86565e-05	0.00973027	1.69356e+09	0.0381768	0.000432795	1.69355e+09	1.3612e-05
	15	0.0516875	0.000637332	1.8834e-05	7.38327e-05	0.0108878	0.0493795	0.000582235	1.71114e-05	8.25427e-05	0.0100077	0.0435152	0.000506182	1.44788e-05	8.42192e-05	0.00959007	0.0381037	0.000435139	1.932e-05	9.12917e-05	0.00905912			1.69355e+09	0.051668	0.000637103	1.69355e+09	1.88831e-05	7.40999e-05	0.0108927	1.69355e+09	0.04936	0.000582078	1.69355e+09	1.71267e-05	8.26756e-05	0.0100505	1.69355e+09	0.0435023	0.000506004	1.69355e+09	1.44698e-05	8.42242e-05	0.00958765	1.69356e+09	0.0380934	0.000435125	1.69355e+09	1.93534e-05
	16	0.0513301	0.000635983	2.26917e-05	7.80433e-05	0.0109373	0.0484864	0.000575874	1.72178e-05	8.8211e-05	0.0100609	0.0430391	0.000504039	1.56108e-05	8.90198e-05	0.00964638	0.0376752	0.000432204	1.50079e-05	8.73258e-05	0.00908427			1.69355e+09	0.0513211	0.000635923	1.69355e+09	2.26809e-05	7.81196e-05	0.0109433	1.69355e+09	0.0484756	0.00057578	1.69355e+09	1.82482e-05	8.86821e-05	0.0101039	1.69355e+09	0.0430264	0.000503877	1.69355e+09	1.56076e-05	8.89985e-05	0.00964428	1.69356e+09	0.0376634	0.000432023	1.69355e+09	1.48477e-05
	17	0.0512452	0.000633996	1.85349e-05	7.62631e-05	0.0109167	0.0488548	0.000576941	6.74392e-05	0.000109926	0.0100069	0.0429126	0.000497382	1.43182e-05	8.29825e-05	0.00951964	0.0375313	0.000424999	1.14923e-05	8.76436e-05	0.00892707			1.69355e+09	0.051241	0.000633958	1.69355e+09	1.85349e-05	7.62631e-05	0.0109221	1.69355e+09	0.0488709	0.00057698	1.69355e+09	6.99529e-05	0.000110999	0.0100467	1.69355e+09	0.0428966	0.000497117	1.69355e+09	1.43941e-05	8.28433e-05	0.00951582	1.69356e+09	0.0375175	0.000424789	1.69355e+09	1.15647e-05
	18	0.0512127	0.000634773	1.53567e-05	7.62025e-05	0.0109388	0.0489332	0.000577127	8.68224e-05	0.000122414	0.00999461	0.0425939	0.000495584	1.77134e-05	8.45845e-05	0.00954867	0.0372929	0.000425523	1.70139e-05	8.65234e-05	0.00899819			1.69355e+09			1.69348e+09				1.69355e+09			1.69355e+09				1.69355e+09			1.69355e+09				1.69356e+09			1.69355e+09
	Cup	C	H3	C	H3		C	H3	C	H3		C	H3	C	H3		C	H3	C	H3
	Info	tbdgy	tbdgy	tbdgy	tbdgy		tbdgy	tbdgy	tbdgy	tbdgy		tbdgy	tbdgy	tbdgy	tbdgy		tbdgy	tbdgy	tbdgy	tbdgy
	Mean	0.0528658	0.000659888	2.06193e-05	7.47934e-05		0.0497043	0.000599095	2.41682e-05	8.82999e-05		0.0443295	0.000524388	1.6933e-05	8.90303e-05		0.0389076	0.000450255	1.43885e-05	9.0083e-05			Mean		0.0528542	0.000659689		2.06957e-05	7.45262e-05			0.0497127	0.00059886		2.05959e-05	8.61935e-05			0.0443364	0.000524793		1.6776e-05	8.90803e-05			0.0389264	0.000450511		1.44594e-05
	StdErr (%)	0.534633	0.728899	3.5129	1.0182		0.299907	0.589833	19.1435	2.91797		0.532702	1.09074	7.37298	1.25017		0.563763	0.824077	4.30365	0.679846
		isotope ratio (blank corrected)		30/29				not-blank corr																isotope ratio (blank corrected)		30/29				not-blank corr
		1		0.0110694				0.0124823																1		0.0110734				0.0124813
		2		0.010281				0.0120532																2		0.0103167				0.0120464
		3		0.00981931				0.0118293																3		0.009826				0.0118366
		4		0.00925655		29/30		0.0115724																4		0.00925963				0.0115734
		average		0.0101066	V/V	98.9455		0.0119843																average		0.0101189	V/V			0.0119844	V/V
				0.0379209				0.0160939																		0.0380008				0.0160054
			S1	0.0656809	urel			0.0278755																	S1	0.0658193	urel			0.0277222
		IDMS blend (bx)
		idms_01		bl_05		30Si/29Si-corr_01	idms_02		bl_06		30Si/29Si-corr_02	idms_03		bl_07		30Si/29Si-corr_03	idms_04		bl_08		30Si/29Si-corr_04			idms_01			bl_05			30Si/29Si-corr_01	idms_02			bl_06			30Si/29Si-corr_02	idms_03			bl_07			30Si/29Si-corr_03	idms_04			bl_08
	Cycle	29.078	30.09	29.078	30.09		29.078	30.09	29.078	30.09		29.078	30.09	29.078	30.09		29.078	30.09	29.078	30.09				time	29.078	30.09	time	29.078	30.09		time	29.078	30.09	time	29.078	30.09		time	29.078	30.09	time	29.078	30.09		time	29.078	30.09	time	29.078
	1	0.0219652	0.084553	1.2202e-05	9.24265e-05	3.84736	0.0203216	0.0782641	5.42413e-06	9.45704e-05	3.84835	0.0194302	0.0748194	9.69302e-06	9.17132e-05	3.84765	0.0187909	0.0724507	1.31239e-05	9.56587e-05	3.85264			1.69356e+09			1.69356e+09				1.69356e+09			1.69356e+09				1.69356e+09			1.69356e+09				1.69356e+09			1.69356e+09
	2	0.0222842	0.085773	1.10014e-05	9.26288e-05	3.84702	0.0204385	0.0787051	1.21499e-05	9.58228e-05	3.84792	0.0197672	0.0761461	1.42004e-05	9.02276e-05	3.84917	0.0189155	0.072931	4.33054e-06	9.35983e-05	3.85266			1.69356e+09	0.0222949	0.0858072	1.69356e+09	1.11483e-05	9.26196e-05	3.84671	1.69356e+09	0.0204276	0.0786675	1.69356e+09	1.23804e-05	9.58817e-05	3.84817	1.69356e+09	0.0197811	0.0761925	1.69356e+09	1.44656e-05	9.0363e-05	3.84878	1.69356e+09	0.0189169	0.0729344	1.69356e+09	4.10105e-06
	3	0.0222603	0.0856422	1.62702e-05	9.21335e-05	3.84529	0.0200196	0.0770674	1.18076e-05	9.64473e-05	3.84663	0.0198148	0.0762976	1.70382e-05	9.60292e-05	3.84757	0.0188291	0.0725586	6.76937e-06	9.31048e-05	3.85056			1.69356e+09	0.0222643	0.0856559	1.69356e+09	1.62073e-05	9.2045e-05	3.84521	1.69356e+09	0.0200142	0.0770498	1.69356e+09	1.17434e-05	9.63694e-05	3.84683	1.69356e+09	0.0198142	0.0762946	1.69356e+09	1.68108e-05	9.60092e-05	3.84752	1.69356e+09	0.0188243	0.0725412	1.69356e+09	6.86988e-06
	4	0.0224808	0.0865447	7.93007e-06	8.76531e-05	3.84771	0.0201747	0.0777172	9.01794e-06	9.14423e-05	3.84928	0.0197361	0.0759819	3.46871e-06	8.9143e-05	3.84691	0.0186876	0.0719864	9.2411e-06	9.6551e-05	3.8491			1.69356e+09	0.0224846	0.0865576	1.69356e+09	7.8438e-06	8.76698e-05	3.84764	1.69356e+09	0.0201772	0.0777247	1.69356e+09	9.03612e-06	9.13438e-05	3.8492	1.69356e+09	0.0197296	0.0759611	1.69356e+09	3.23977e-06	8.90893e-05	3.84711	1.69356e+09	0.0186775	0.0719516	1.69356e+09	9.31084e-06
	5	0.0224445	0.086367	1.20562e-05	9.30712e-05	3.84602	0.0201442	0.077487	1.26956e-05	9.09089e-05	3.84367	0.0194941	0.0751305	6.23255e-06	9.31128e-05	3.85099	0.01835	0.0706674	1.01767e-05	8.82365e-05	3.84803			1.69356e+09	0.0224383	0.0863449	1.69356e+09	1.21012e-05	9.31365e-05	3.8461	1.69356e+09	0.0201234	0.0774155	1.69356e+09	1.26844e-05	9.08719e-05	3.84412	1.69356e+09	0.0194701	0.0750519	1.69356e+09	6.61156e-06	9.32537e-05	3.85169	1.69356e+09	0.0183344	0.0706129	1.69356e+09	1.02411e-05
	6	0.0223092	0.0858408	9.17418e-06	8.97336e-05	3.84577	0.0196	0.075437	8.70767e-06	9.0264e-05	3.8458	0.0190695	0.0734754	1.39635e-05	9.36353e-05	3.84995	0.018254	0.0702504	1.10258e-05	9.65672e-05	3.84542			1.69356e+09	0.0222939	0.0857891	1.69356e+09	9.25572e-06	8.96309e-05	3.84608	1.69356e+09	0.0195968	0.0754271	1.69356e+09	8.57622e-06	9.02453e-05	3.84596	1.69356e+09	0.0190741	0.0734904	1.69356e+09	1.38569e-05	9.36274e-05	3.84979	1.69356e+09	0.0182622	0.070278	1.69356e+09	1.08374e-05
	7	0.0216975	0.0834588	1.60395e-05	8.72939e-05	3.84439	0.0199898	0.0769325	6.27435e-06	8.9853e-05	3.84563	0.0197166	0.0759708	8.50704e-07	9.26541e-05	3.85016	0.0187512	0.0722206	9.72811e-07	8.77904e-05	3.84853			1.69356e+09	0.0216848	0.0834166	1.69356e+09	1.60284e-05	8.73605e-05	3.8447	1.69356e+09	0.0199995	0.0769648	1.69356e+09	6.28799e-06	8.98402e-05	3.8454	1.69356e+09	0.0197299	0.0760157	1.69356e+09	7.65368e-07	9.25983e-05	3.84981	1.69356e+09	0.0187621	0.0722586	1.69356e+09	1.03822e-06
	8	0.0216885	0.0834669	8.629e-06	9.34774e-05	3.84636	0.0200765	0.0772519	9.37403e-06	8.95468e-05	3.84492	0.019721	0.0760009	9.65389e-06	9.03889e-05	3.85082	0.0187831	0.0723826	1.42208e-05	9.47397e-05	3.85061			1.69356e+09	0.0216989	0.0835024	1.69356e+09	8.3863e-06	9.34033e-05	3.84615	1.69356e+09	0.0200824	0.0772721	1.69356e+09	9.48778e-06	8.96477e-05	3.84483	1.69356e+09	0.0197194	0.0759943	1.69356e+09	9.89238e-06	9.03546e-05	3.85078	1.69356e+09	0.0187799	0.0723749	1.69356e+09	1.45539e-05
	9	0.0219853	0.0845915	9.31907e-06	8.49329e-05	3.8456	0.0201528	0.0775782	9.42397e-06	9.3068e-05	3.84655	0.0196717	0.0757612	7.45428e-06	9.15627e-05	3.84829	0.0186614	0.0719769	1.01991e-05	9.3309e-05	3.854			1.69356e+09	0.0219966	0.08463	1.69356e+09	9.3852e-06	8.47855e-05	3.84537	1.69356e+09	0.0201541	0.0775836	1.69356e+09	9.34378e-06	9.30186e-05	3.84662	1.69356e+09	0.0196683	0.0757489	1.69356e+09	7.40769e-06	9.16219e-05	3.84831	1.69356e+09	0.0186587	0.0719677	1.69356e+09	1.02013e-05
	10	0.0222408	0.0856291	1.18595e-05	8.51889e-05	3.84806	0.0201389	0.07756	5.45672e-06	8.67699e-05	3.8483	0.0195529	0.0753118	7.37811e-06	9.37148e-05	3.84868	0.0186448	0.0718489	1.43346e-05	0.000105706	3.85055			1.69356e+09	0.0222408	0.0856278	1.69356e+09	1.19015e-05	8.53636e-05	3.84802	1.69356e+09	0.0201384	0.0775583	1.69356e+09	5.42913e-06	8.67636e-05	3.84836	1.69356e+09	0.0195501	0.075302	1.69356e+09	7.42973e-06	9.36822e-05	3.84872	1.69356e+09	0.0186412	0.0718346	1.69356e+09	1.48686e-05
	11	0.0219828	0.0845194	1.13737e-05	9.47528e-05	3.84275	0.020126	0.0774861	8.07632e-06	9.27168e-05	3.8471	0.0195326	0.0752104	9.9758e-06	8.97317e-05	3.84749	0.0184778	0.0711455	3.71674e-05	0.000141146	3.8473			1.69356e+09	0.0219616	0.0844476	1.69356e+09	1.13301e-05	9.49256e-05	3.84319	1.69356e+09	0.0201283	0.0774935	1.69356e+09	8.41162e-06	9.27005e-05	3.84707	1.69356e+09	0.0195246	0.0751828	1.69356e+09	9.83118e-06	8.96087e-05	3.84763	1.69356e+09	0.0184642	0.0710986	1.69356e+09	3.71267e-05
	12	0.0216542	0.0833414	1.0651e-05	9.0699e-05	3.84667	0.0202025	0.0777972	1.47406e-05	8.62504e-05	3.84795	0.019331	0.0744347	3.37364e-06	8.9794e-05	3.8475	0.018269	0.0703558	1.32071e-05	0.000100526	3.84803			1.69356e+09	0.0216355	0.0832795	1.69356e+09	1.07362e-05	9.07286e-05	3.84713	1.69356e+09	0.020202	0.077796	1.69356e+09	1.45684e-05	8.61139e-05	3.84802	1.69356e+09	0.0193349	0.0744488	1.69356e+09	3.28533e-06	8.98293e-05	3.84742	1.69356e+09	0.0182698	0.0703603	1.69356e+09	1.26142e-05
	13	0.021039	0.0809205	1.55356e-05	9.64152e-05	3.84407	0.0201009	0.0774177	-6.1707e-07	8.50425e-05	3.8485	0.0197239	0.0760027	5.80689e-06	9.16517e-05	3.85035	0.018513	0.0713854	8.20226e-06	9.11529e-05	3.85295			1.69356e+09	0.0210298	0.0808897	1.69356e+09	1.55658e-05	9.63705e-05	3.84429	1.69356e+09	0.0201019	0.0774211	1.69356e+09	-9.14786e-07	8.50838e-05	3.84853	1.69356e+09	0.0197289	0.0760198	1.69356e+09	5.91104e-06	9.16591e-05	3.85022	1.69356e+09	0.0185183	0.0714044	1.69356e+09	8.10957e-06
	14	0.0211897	0.0815497	1.21269e-05	8.81823e-05	3.84642	0.0202509	0.0779988	-2.94039e-07	8.85747e-05	3.8487	0.0195741	0.0753955	8.28957e-06	9.01977e-05	3.8488	0.0185215	0.0713851	8.67913e-06	9.32152e-05	3.85115			1.69356e+09	0.02121	0.0816181	1.69356e+09	1.19902e-05	8.80036e-05	3.84598	1.69356e+09	0.0202545	0.0780105	1.69356e+09	3.47744e-08	8.86549e-05	3.84862	1.69356e+09	0.0195674	0.0753722	1.69356e+09	8.28429e-06	9.0153e-05	3.84889	1.69356e+09	0.0185239	0.0713919	1.69356e+09	8.67709e-06
	15	0.0215997	0.0831011	1.17518e-05	9.07208e-05	3.84525	0.0202018	0.0777904	8.48836e-06	8.75969e-05	3.84773	0.0195394	0.075259	5.66077e-06	9.02255e-05	3.84864	0.0185788	0.0716042	8.14596e-06	9.30909e-05	3.85108			1.69356e+09	0.0216064	0.0831244	1.69356e+09	1.18202e-05	9.08334e-05	3.84512	1.69356e+09	0.0201995	0.0777833	1.69356e+09	8.62764e-06	8.76716e-05	3.84786	1.69356e+09	0.0195368	0.0752502	1.69356e+09	5.78322e-06	9.01727e-05	3.84868	1.69356e+09	0.018573	0.0715851	1.69356e+09	8.16287e-06
	16	0.0215202	0.0828605	1.54668e-05	9.45125e-05	3.84826	0.0201382	0.0775982	6.51017e-06	9.27705e-05	3.85035	0.0194466	0.074902	1.42716e-05	8.72255e-05	3.84866	0.0182388	0.0703074	9.50508e-06	8.53488e-05	3.85175			1.69356e+09	0.021522	0.0828669	1.69356e+09	1.54318e-05	9.44347e-05	3.84823	1.69356e+09	0.0201371	0.0775949	1.69356e+09	6.5468e-06	9.28087e-05	3.85043	1.69356e+09	0.0194406	0.0748826	1.69356e+09	1.42515e-05	8.71926e-05	3.84881	1.69356e+09	0.0182337	0.0702901	1.69356e+09	9.41487e-06
	17	0.0216895	0.0834613	1.00393e-05	8.63499e-05	3.84592	0.0201486	0.0776038	1.02778e-05	8.97418e-05	3.84864	0.0192496	0.0741651	4.67788e-06	8.83799e-05	3.84975	0.0183291	0.0706306	3.73928e-06	9.43977e-05	3.85042			1.69356e+09	0.0216989	0.0834921	1.69356e+09	9.94069e-06	8.63457e-05	3.84567	1.69356e+09	0.0201422	0.0775808	1.69356e+09	1.03846e-05	8.96859e-05	3.84875	1.69356e+09	0.019231	0.0741044	1.69356e+09	4.49854e-06	8.85029e-05	3.85031	1.69356e+09	0.0183339	0.0706483	1.69356e+09	3.59317e-06
	18	0.0217806	0.0838412	1.27354e-05	9.43793e-05	3.84729	0.0199616	0.0768648	9.46564e-06	9.0991e-05	3.84766	0.0189295	0.0729678	9.30576e-06	9.11484e-05	3.85162	0.0183733	0.07087	5.45925e-06	8.94741e-05	3.85418			1.69356e+09			1.69356e+09				1.69356e+09			1.69356e+09				1.69356e+09			1.69356e+09				1.69356e+09			1.69356e+09
	Cup	C	H3	C	H3		C	H3	C	H3		C	H3	C	H3		C	H3	C	H3
	Info	tbdgy	tbdgy	tbdgy	tbdgy		tbdgy	tbdgy	tbdgy	tbdgy		tbdgy	tbdgy	tbdgy	tbdgy		tbdgy	tbdgy	tbdgy	tbdgy
	Mean	0.0218784	0.0841923	1.18979e-05	9.08084e-05		0.0201215	0.0774754	8.16553e-06	9.06877e-05		0.0195167	0.0751796	8.40529e-06	9.11409e-05		0.0185538	0.0714976	1.04722e-05	9.63119e-05			Mean		0.0218788	0.0841906		1.1817e-05	9.04785e-05			0.0201174	0.077459		8.28927e-06	9.04188e-05			0.0195563	0.075332		8.27031e-06	9.11074e-05			0.0185484	0.0714708		1.06076e-05
	StdErr (%)	0.444177	0.445976	5.03284	0.911736		0.201629	0.205565	11.5693	0.830185		0.295434	0.292574	12.1957	0.552386		0.274908	0.279934	17.1319	2.96825
		isotope ratio (blank corrected)		30/29				not-blank corr																isotope ratio (blank corrected)		30/29				not-blank corr
		1		3.84612				3.84819																1		3.84597				3.84804
		2		3.84743				3.85038																2		3.84742				3.85034
		3		3.84906				3.85206																3		3.84903				3.85206
		4		3.8505				3.85352																4		3.85019				3.85321
		average		3.84828	V/V			3.85104																average		3.84815	V/V			3.85091	V/V
				0.000247698				0.000297907																		0.000239397				0.000292139
			S1	0.000429026	urel			0.000515989																	S1	0.000414648	urel			0.000506
		material w (WASO04)				material: WASO04 41963/04/72-75 part Mi 2.08
		waso_01		bl_09		30Si/29Si-corr_01	waso_02		bl_10		30Si/29Si-corr_02	waso_03		bl_11		30Si/29Si-corr_03	waso_04		bl_12		30Si/29Si-corr_04			waso_01			bl_09			30Si/29Si-corr_01	waso_02			bl_10			30Si/29Si-corr_02	waso_03			bl_11			30Si/29Si-corr_03	waso_04			bl_12
	Cycle	29.078	30.09	29.078	30.09		29.078	30.09	29.078	30.09		29.078	30.09	29.078	30.09		29.078	30.09	29.078	30.09				time	29.078	30.09	time	29.078	30.09		time	29.078	30.09	time	29.078	30.09		time	29.078	30.09	time	29.078	30.09		time	29.078	30.09	time	29.078
	1	0.0844676	0.0598266	3.0556e-06	9.64579e-05	0.707234	0.0808056	0.0572035	2.79545e-05	0.000105233	0.706873	0.0790312	0.0559464	2.56058e-05	0.000103002	0.706877	0.0765273	0.054191	2.72905e-05	0.000100919	0.707085			1.69356e+09			1.69356e+09				1.69356e+09			1.69356e+09				1.69356e+09			1.69356e+09				1.69356e+09			1.69356e+09
	2	0.0839077	0.0594287	3.09944e-07	9.11602e-05	0.707212	0.0790283	0.0559446	2.41472e-05	0.000102939	0.706841	0.0774791	0.0548529	3.04874e-05	9.86083e-05	0.706922	0.0772382	0.054705	2.76173e-05	0.000104542	0.707233			1.69356e+09	0.0838148	0.0593715	1.69356e+09	4.5996e-07	9.10427e-05	0.707314	1.69356e+09	0.078926	0.0558818	1.69356e+09	2.40816e-05	0.000102765	0.706966	1.69356e+09	0.0774048	0.054808	1.69356e+09	3.05977e-05	9.85884e-05	0.707022	1.69356e+09	0.0773076	0.0547476	1.69356e+09	2.74789e-05
	3	0.0818963	0.0580016	7.20955e-06	9.27125e-05	0.707156	0.0779729	0.0552003	2.61395e-05	9.96711e-05	0.706863	0.0769725	0.0545159	2.86593e-05	0.000102368	0.707198	0.0784495	0.0555467	2.34577e-05	9.7932e-05	0.707041			1.69356e+09	0.0819137	0.0580126	1.69356e+09	7.24699e-06	9.27389e-05	0.707142	1.69356e+09	0.0780021	0.055219	1.69356e+09	2.60807e-05	9.95913e-05	0.706842	1.69356e+09	0.0770248	0.0545484	1.69356e+09	2.84582e-05	0.000102273	0.70714	1.69356e+09	0.0784777	0.0555636	1.69356e+09	2.33575e-05
	4	0.0847845	0.0600648	2.20115e-06	9.26944e-05	0.7074	0.0804591	0.0569922	2.12744e-05	9.84505e-05	0.707292	0.0800323	0.0566801	2.09975e-05	9.34274e-05	0.707202	0.0786642	0.0556881	2.25594e-05	9.46298e-05	0.706909			1.69356e+09	0.0848503	0.0601054	1.69356e+09	2.20332e-06	9.27416e-05	0.707333	1.69356e+09	0.0805153	0.0570273	1.69356e+09	2.11117e-05	9.84227e-05	0.707239	1.69356e+09	0.0800874	0.0567145	1.69356e+09	2.0894e-05	9.34085e-05	0.707144	1.69356e+09	0.0786602	0.0556854	1.69356e+09	2.26295e-05
	5	0.0852194	0.0603639	7.31928e-06	9.54582e-05	0.7073	0.0807178	0.0571712	1.81878e-05	9.81087e-05	0.707242	0.0796653	0.0564456	2.37758e-05	0.000101338	0.707515	0.0782428	0.0553889	2.69968e-05	9.64682e-05	0.706892			1.69356e+09	0.08523	0.0603696	1.69356e+09	7.46305e-06	9.54103e-05	0.707282	1.69356e+09	0.0807364	0.0571825	1.69356e+09	1.80189e-05	9.79276e-05	0.707224	1.69356e+09	0.0796894	0.0564607	1.69356e+09	2.3952e-05	0.000101551	0.707492	1.69356e+09	0.0782328	0.0553834	1.69356e+09	2.70537e-05
	6	0.0850763	0.0602473	6.18201e-06	9.11679e-05	0.707118	0.0809744	0.0573517	1.65965e-05	9.26775e-05	0.70723	0.0806982	0.0571628	2.58754e-05	0.000100218	0.707347	0.0783875	0.055515	2.41333e-05	9.57569e-05	0.707197			1.69356e+09	0.0850077	0.0602044	1.69356e+09	6.05386e-06	9.10792e-05	0.707187	1.69356e+09	0.0809807	0.057355	1.69356e+09	1.65985e-05	9.26186e-05	0.707221	1.69356e+09	0.0807336	0.0571838	1.69356e+09	2.64953e-05	0.00010064	0.707297	1.69356e+09	0.0783946	0.05552	1.69356e+09	2.40926e-05
	7	0.0818673	0.0579522	1.27094e-06	9.06426e-05	0.706802	0.0810285	0.0573548	1.82875e-05	9.46871e-05	0.706797	0.0813939	0.057627	5.50821e-05	0.000125899	0.707006	0.0785798	0.0556587	2.50794e-05	9.60992e-05	0.707295			1.69356e+09	0.081781	0.0578997	1.69356e+09	1.19548e-06	9.06452e-05	0.706908	1.69356e+09	0.0810267	0.0573533	1.69356e+09	1.83023e-05	9.47025e-05	0.706798	1.69356e+09	0.081414	0.057639	1.69356e+09	5.51598e-05	0.000125874	0.706977	1.69356e+09	0.0785892	0.0556642	1.69356e+09	2.51077e-05
	8	0.08086	0.0572914	2.62057e-06	9.13114e-05	0.707435	0.0808883	0.0572636	1.73159e-05	9.35691e-05	0.706893	0.0816829	0.0578333	2.97986e-05	9.87509e-05	0.707029	0.0788267	0.0558119	2.54668e-05	9.91298e-05	0.707023			1.69356e+09	0.0808836	0.0573074	1.69356e+09	2.76811e-06	9.12711e-05	0.707429	1.69356e+09	0.0808775	0.0572578	1.69356e+09	1.73015e-05	9.35068e-05	0.706922	1.69356e+09	0.0816744	0.0578279	1.69356e+09	2.86123e-05	9.77892e-05	0.707037	1.69356e+09	0.0788481	0.0558249	1.69356e+09	2.53081e-05
	9	0.0825218	0.0584617	5.35651e-06	8.93606e-05	0.70737	0.080728	0.0571717	1.78871e-05	9.27037e-05	0.707158	0.0811573	0.0574553	2.22354e-05	9.52499e-05	0.70695	0.0791722	0.0560729	2.06858e-05	9.73069e-05	0.707234			1.69356e+09	0.0825436	0.0584748	1.69356e+09	5.35389e-06	8.9309e-05	0.707344	1.69356e+09	0.0807232	0.0571687	1.69356e+09	1.78476e-05	9.27965e-05	0.707169	1.69356e+09	0.0811583	0.057456	1.69356e+09	2.19836e-05	9.52575e-05	0.706951	1.69356e+09	0.0791707	0.056072	1.69356e+09	2.06829e-05
	10	0.0819277	0.0580279	2.48829e-06	8.83129e-05	0.707205	0.0806537	0.0570964	1.53883e-05	9.87875e-05	0.706877	0.0817298	0.0578754	1.74997e-05	9.91783e-05	0.707139	0.0787542	0.0557596	2.53244e-05	9.55401e-05	0.70701			1.69356e+09	0.0819478	0.0580398	1.69356e+09	2.40262e-06	8.83341e-05	0.707179	1.69356e+09	0.0806431	0.0570903	1.69356e+09	1.54581e-05	9.8877e-05	0.706899	1.69356e+09	0.0817399	0.0578819	1.69356e+09	1.74248e-05	9.91538e-05	0.707131	1.69356e+09	0.0787443	0.0557534	1.69356e+09	2.5471e-05
	11	0.0835023	0.0591296	1.02983e-06	9.05908e-05	0.707062	0.0802115	0.0568272	2.12989e-05	9.77336e-05	0.707418	0.0816485	0.0578203	1.85798e-05	9.38721e-05	0.707167	0.0786901	0.0557252	2.78482e-05	9.75653e-05	0.707148			1.69356e+09	0.0835818	0.0591777	1.69356e+09	1.06201e-06	9.07156e-05	0.706969	1.69356e+09	0.0802262	0.0568371	1.69356e+09	2.11989e-05	9.77087e-05	0.707417	1.69356e+09	0.0816377	0.0578131	1.69356e+09	1.863e-05	9.37327e-05	0.707173	1.69356e+09	0.0787	0.0557316	1.69356e+09	2.76383e-05
	12	0.0841279	0.0595627	3.37933e-06	9.22909e-05	0.706953	0.0810625	0.0574123	1.26192e-05	9.79959e-05	0.707209	0.0814287	0.0576454	1.88896e-05	9.47359e-05	0.706929	0.0790292	0.0559655	1.95115e-05	9.26839e-05	0.707154			1.69356e+09	0.0841308	0.0595647	1.69356e+09	3.40564e-06	9.22595e-05	0.706955	1.69356e+09	0.0810806	0.0574232	1.69356e+09	1.24483e-05	9.7967e-05	0.707191	1.69356e+09	0.0814165	0.0576379	1.69356e+09	1.89216e-05	9.47871e-05	0.706941	1.69356e+09	0.0790355	0.0559695	1.69356e+09	1.93448e-05
	13	0.0836421	0.0592441	2.31499e-06	8.88249e-05	0.707251	0.0810975	0.057441	1.29489e-05	9.61102e-05	0.707257	0.0810361	0.0573824	2.01474e-05	9.67517e-05	0.707109	0.0789996	0.0559542	1.9705e-05	9.50607e-05	0.707276			1.69356e+09	0.0836386	0.0592418	1.69356e+09	2.31685e-06	8.87577e-05	0.707254	1.69356e+09	0.0810599	0.0574176	1.69356e+09	1.30821e-05	9.61069e-05	0.707302	1.69356e+09	0.0810409	0.0573855	1.69356e+09	2.00213e-05	9.66459e-05	0.707104	1.69356e+09	0.0790026	0.0559561	1.69356e+09	1.97713e-05
	14	0.0839574	0.05943	3.47044e-06	8.85139e-05	0.706808	0.0792244	0.0560932	1.91244e-05	9.78123e-05	0.706966	0.0816742	0.0578225	1.2732e-05	8.87841e-05	0.706972	0.0791796	0.0560752	2.27492e-05	9.21133e-05	0.707196			1.69356e+09	0.083959	0.0594297	1.69356e+09	3.54367e-06	8.8525e-05	0.706793	1.69356e+09	0.0791322	0.0560358	1.69356e+09	1.91465e-05	9.7792e-05	0.70707	1.69356e+09	0.0816632	0.0578156	1.69356e+09	1.28103e-05	8.86491e-05	0.706983	1.69356e+09	0.0791957	0.0560848	1.69356e+09	2.28221e-05
	15	0.0836856	0.0592346	4.34282e-06	8.91777e-05	0.706769	0.0785444	0.0556115	1.35612e-05	9.54644e-05	0.706954	0.0807307	0.0571626	2.23153e-05	9.24482e-05	0.70706	0.079445	0.0562605	2.17228e-05	8.98761e-05	0.707167			1.69356e+09	0.0836873	0.0592364	1.69356e+09	4.35544e-06	8.92159e-05	0.706778	1.69356e+09	0.0785918	0.0556407	1.69356e+09	1.34327e-05	9.54047e-05	0.706905	1.69356e+09	0.0807135	0.0571522	1.69356e+09	2.24424e-05	9.2552e-05	0.707082	1.69356e+09	0.0794222	0.0562472	1.69356e+09	2.161e-05
	16	0.0840407	0.0595307	4.08683e-06	9.06569e-05	0.707306	0.081538	0.0577366	1.28497e-05	9.44559e-05	0.707062	0.0808593	0.0572586	1.89422e-05	9.46169e-05	0.707123	0.0780283	0.0553027	1.7237e-05	9.51705e-05	0.707731			1.69356e+09	0.0840468	0.059535	1.69356e+09	4.07998e-06	9.0615e-05	0.707308	1.69356e+09	0.081609	0.0577804	1.69356e+09	1.29635e-05	9.43901e-05	0.706988	1.69356e+09	0.080854	0.0572553	1.69356e+09	1.88587e-05	9.4643e-05	0.707129	1.69356e+09	0.0780026	0.0552866	1.69356e+09	1.78207e-05
	17	0.0839839	0.0594789	4.00828e-06	8.68224e-05	0.707168	0.0820136	0.0580695	1.91216e-05	9.17629e-05	0.70702	0.0804812	0.0569844	1.82328e-05	9.39196e-05	0.707038	0.0781483	0.0553233	5.02341e-05	0.000114419	0.706908			1.69356e+09	0.0839809	0.0594752	1.69356e+09	4.12636e-06	8.67949e-05	0.707151	1.69356e+09	0.0820611	0.0580988	1.69356e+09	1.91401e-05	9.19188e-05	0.706974	1.69356e+09	0.0804831	0.0569855	1.69356e+09	1.852e-05	9.39621e-05	0.707035	1.69356e+09	0.078193	0.055349	1.69356e+09	5.12947e-05
	18	0.0839587	0.0594121	7.35617e-06	8.97807e-05	0.706584	0.0828521	0.0586711	1.33631e-05	9.94236e-05	0.707126	0.080911	0.0572927	2.68937e-05	9.597e-05	0.707093	0.079267	0.0561207	4.66042e-05	0.000113929	0.706992			1.69356e+09			1.69356e+09				1.69356e+09			1.69356e+09				1.69356e+09			1.69356e+09				1.69356e+09			1.69356e+09
	Cup	C	H3	C	H3		C	H3	C	H3		C	H3	C	H3		C	H3	C	H3
	Info	tbdgy	tbdgy	tbdgy	tbdgy		tbdgy	tbdgy	tbdgy	tbdgy		tbdgy	tbdgy	tbdgy	tbdgy		tbdgy	tbdgy	tbdgy	tbdgy
	Mean	0.0835237	0.0591494	3.77792e-06	9.08854e-05		0.0805445	0.057034	1.82259e-05	9.70881e-05		0.0804785	0.0569869	2.42639e-05	9.82854e-05		0.078535	0.0556147	2.63457e-05	9.82857e-05			Mean		0.0834374	0.0590904		3.62733e-06	9.0591e-05			0.080387	0.0569231		1.78883e-05	9.6406e-05			0.080546	0.0570353		2.39864e-05	9.80942e-05			0.0786236	0.0556775		2.50927e-05
	StdErr (%)	0.343682	0.342753	13.545	0.63069		0.351299	0.352724	5.93399	0.865264		0.408144	0.407191	8.78436	1.88027		0.219034	0.218418	7.69412	1.59189
		isotope ratio (blank corrected)		30/29				not-blank corr																isotope ratio (blank corrected)		30/29				not-blank corr
		1		0.707119				0.708174																1		0.707145				0.7082
		2		0.70706				0.708106																2		0.70707				0.708113
		3		0.707093				0.708101																3		0.707102				0.708109
		4		0.707138				0.708153																4		0.707142				0.708153
		average		0.707102	V/V			0.708134																average		0.707115	V/V			0.708144	V/V
				2.39697e-05				2.52878e-05																		2.51954e-05				2.99672e-05
			S1	4.15167e-05	urel			4.37997e-05																	S1	4.36397e-05	urel			5.19046e-05
[truncated: 2 more columns]

## Sheet: raw data 6 seq
	raw data: sample and IDMS measurement																							tau-corrected data ->>
	sample: Si28-33Pr11 Part N.2.1																							tau correction
	Sequence 6	no rotation	10^13 Ohm																							tau constant
																								cup	C	0.6061
		sample (x, Si28)																						cup	H3	0.5266
		Si28_01		bl_01		30Si/29Si-corr_01	Si28_02		bl_02		30Si/29Si-corr_02	Si28_03		bl_03		30Si/29Si-corr_03	Si28_04		bl_04		30Si/29Si-corr_04			Si28_01			bl_01			30Si/29Si-corr_01	Si28_02			bl_02			30Si/29Si-corr_02	Si28_03			bl_03			30Si/29Si-corr_03	Si28_04			bl_04
	Cycle	29.078	30.09	29.078	30.09		29.078	30.09	29.078	30.09		29.078	30.09	29.078	30.09		29.078	30.09	29.078	30.09				time	29.078	30.09	Time	29.078	30.09		time	29.078	30.09	time	29.078	30.09		time	29.078	30.09	time	29.078	30.09		time	29.078	30.09	time	29.078
	1	0.0269429	0.000409249	2.51948e-06	6.86149e-05	0.0127891	0.0256939	0.000371305	-5.55055e-06	6.71421e-05	0.0118481	0.0228105	0.000314339	-8.60317e-06	6.89034e-05	0.0109673	0.0206391	0.000278075	-7.51531e-06	6.45279e-05	0.0104238			1.69381e+09			1.69381e+09				1.69381e+09			1.69381e+09				1.69381e+09			1.69381e+09				1.69381e+09			1.69381e+09
	2	0.0269495	0.000411229	6.48178e-06	6.69432e-05	0.0128595	0.0258285	0.000378137	-1.82482e-06	6.86614e-05	0.0120508	0.0230829	0.000319474	-5.95988e-06	6.25006e-05	0.0110604	0.0209588	0.000279579	-1.19209e-05	6.22269e-05	0.0103366			1.69381e+09	0.0269576	0.000411319	1.69381e+09	6.41585e-06	6.67153e-05	0.0128724	1.69381e+09	0.0258399	0.000378152	1.69381e+09	-1.8341e-06	6.86752e-05	0.0120423	1.69381e+09	0.023102	0.000319712	1.69381e+09	-5.76623e-06	6.22775e-05	0.0110861	1.69381e+09	0.0209771	0.00027979	1.69381e+09	-1.18985e-05
	3	0.0271697	0.000412119	6.93954e-07	6.13489e-05	0.012788	0.0260109	0.000371755	-5.80757e-06	6.75838e-05	0.011721	0.0233392	0.000321911	-3.24121e-06	6.17944e-05	0.0110433	0.0211456	0.000284782	-6.89517e-06	6.40794e-05	0.0104913			1.69381e+09	0.0271767	0.000412132	1.69381e+09	6.72419e-07	6.12569e-05	0.0127986	1.69381e+09	0.0260149	0.000371601	1.69381e+09	-5.7716e-06	6.75343e-05	0.0117096	1.69381e+09	0.0233429	0.00032187	1.69381e+09	-3.22658e-06	6.17751e-05	0.0110642	1.69381e+09	0.0211513	0.000284882	1.69381e+09	-6.73222e-06
	4	0.0272896	0.000411966	5.42989e-06	6.17716e-05	0.0127262	0.026019	0.000369779	-1.26937e-07	6.59732e-05	0.0116414	0.0232625	0.000317156	-5.24536e-06	6.14122e-05	0.0108754	0.0212408	0.000285191	-4.22931e-06	6.21001e-05	0.0104635			1.69381e+09	0.0272944	0.000411975	1.69381e+09	5.54017e-06	6.1851e-05	0.0127376	1.69381e+09	0.0260215	0.000369781	1.69381e+09	-6.2719e-08	6.59618e-05	0.0116367	1.69381e+09	0.0232566	0.000317053	1.69381e+09	-5.14517e-06	6.15067e-05	0.0108981	1.69381e+09	0.0212449	0.000285221	1.69381e+09	-4.24128e-06
	5	0.0274026	0.000412617	6.08057e-06	6.58139e-05	0.0126975	0.0261277	0.000371876	-2.77645e-06	6.69633e-05	0.0116732	0.0230531	0.00031613	1.65307e-06	6.71084e-05	0.0109296	0.0213463	0.00028646	-7.45984e-06	6.13534e-05	0.0104712			1.69381e+09	0.0274182	0.000412747	1.69381e+09	6.01324e-06	6.59677e-05	0.0127083	1.69381e+09	0.0261333	0.000371845	1.69381e+09	-2.69211e-06	6.69519e-05	0.0116659	1.69381e+09	0.0230544	0.000316241	1.69381e+09	1.73008e-06	6.71619e-05	0.0109584	1.69381e+09	0.0213546	0.000286477	1.69381e+09	-7.48573e-06
	6	0.0277234	0.000416126	3.56548e-06	6.66715e-05	0.0126771	0.0261744	0.000368792	2.2084e-06	6.56092e-05	0.0115346	0.0232989	0.000320695	-3.11307e-06	6.31156e-05	0.0110103	0.0214706	0.000285744	-4.94616e-06	6.82983e-05	0.0103773			1.69381e+09	0.0277202	0.000415966	1.69381e+09	3.66734e-06	6.66281e-05	0.0126859	1.69381e+09	0.0261768	0.000368737	1.69381e+09	2.21765e-06	6.56871e-05	0.0115277	1.69381e+09	0.0233075	0.000320714	1.69381e+09	-3.24146e-06	6.3087e-05	0.0110314	1.69381e+09	0.0214739	0.00028568	1.69381e+09	-4.91862e-06
	7	0.0272536	0.000403927	1.08888e-05	6.34546e-05	0.012448	0.026249	0.000368778	-2.32459e-06	7.13445e-05	0.0115013	0.0234607	0.000317177	-4.4069e-06	6.55545e-05	0.0107844	0.0215107	0.000282839	-6.11448e-06	5.8214e-05	0.010223			1.69381e+09	0.0272498	0.000403819	1.69381e+09	1.09189e-05	6.34393e-05	0.0124592	1.69381e+09	0.0262569	0.000368886	1.69381e+09	-2.37515e-06	7.13812e-05	0.0114982	1.69381e+09	0.0234708	0.000317217	1.69381e+09	-4.49472e-06	6.5637e-05	0.0108056	1.69381e+09	0.0215061	0.000282785	1.69381e+09	-6.00152e-06
	8	0.0275445	0.000410262	4.98563e-06	6.58409e-05	0.0125465	0.026562	0.000374822	-2.61283e-07	6.76765e-05	0.0115933	0.0237755	0.000322861	-7.25828e-06	6.75948e-05	0.0108806	0.021247	0.000282711	5.71787e-07	6.62271e-05	0.0103438			1.69381e+09	0.0275517	0.000410357	1.69381e+09	4.64171e-06	6.57742e-05	0.0125599	1.69381e+09	0.0265707	0.000374977	1.69381e+09	3.50485e-07	6.75785e-05	0.0115917	1.69381e+09	0.0237831	0.000322984	1.69381e+09	-7.0709e-06	6.75245e-05	0.0109062	1.69381e+09	0.0212408	0.000282747	1.69381e+09	5.38502e-07
	9	0.0274527	0.000406975	1.36565e-06	6.13274e-05	0.0124688	0.0264915	0.000373729	1.46154e-05	6.82206e-05	0.0115829	0.0236698	0.000321109	7.81578e-07	6.33154e-05	0.0108553	0.0213379	0.000283981	-7.03615e-06	6.66862e-05	0.0103592			1.69381e+09	0.0274508	0.000406879	1.69381e+09	1.36359e-06	6.13258e-05	0.0124794	1.69381e+09	0.0264801	0.000373566	1.69381e+09	1.46068e-05	6.82579e-05	0.0115781	1.69381e+09	0.0236646	0.000321011	1.69381e+09	8.65068e-07	6.3303e-05	0.0108774	1.69381e+09	0.0213479	0.000283916	1.69381e+09	-7.28562e-06
	10	0.0274547	0.000404847	4.88498e-06	6.57493e-05	0.0123903	0.0260237	0.000365958	-6.63993e-07	6.97721e-05	0.0114924	0.0235243	0.00031733	-3.17968e-06	6.69016e-05	0.0107617	0.0217147	0.000279188	-1.12048e-05	5.99697e-05	0.00995888			1.69381e+09	0.02746	0.000404779	1.69381e+09	4.81589e-06	6.5757e-05	0.0123987	1.69381e+09	0.0260168	0.000365954	1.69381e+09	-1.08632e-06	6.97046e-05	0.0114917	1.69381e+09	0.0235245	0.000317328	1.69381e+09	-3.34265e-06	6.68332e-05	0.0107857	1.69381e+09	0.0217188	0.000279207	1.69381e+09	-1.104e-05
	11	0.0277094	0.000403152	-2.00947e-06	6.1758e-05	0.0122152	0.0261667	0.000373541	-5.31578e-06	6.44242e-05	0.0117194	0.0236804	0.000320996	-7.17977e-06	5.94706e-05	0.0108456	0.0215346	0.000284979	7.40948e-07	6.45929e-05	0.0103109			1.69381e+09	0.0277188	0.000403336	1.69381e+09	-2.07601e-06	6.1811e-05	0.0122309	1.69381e+09	0.0261669	0.000373493	1.69381e+09	-5.61121e-06	6.43731e-05	0.0117139	1.69381e+09	0.0236804	0.000320896	1.69381e+09	-7.21067e-06	5.93527e-05	0.0108653	1.69381e+09	0.021522	0.000284996	1.69381e+09	7.60862e-07
	12	0.0277142	0.000410698	3.04255e-06	6.74409e-05	0.0124854	0.026028	0.000364441	-8.84427e-06	6.81452e-05	0.0114323	0.0235234	0.000314145	-4.03525e-06	6.31446e-05	0.0106268	0.0213647	0.000279739	-1.06534e-05	6.10624e-05	0.0101477			1.69381e+09	0.0277063	0.000410575	1.69381e+09	3.19425e-06	6.75588e-05	0.0124977	1.69381e+09	0.0260057	0.000364023	1.69381e+09	-8.8086e-06	6.81322e-05	0.0114223	1.69381e+09	0.0235165	0.000313971	1.69381e+09	-4.02796e-06	6.32187e-05	0.0106467	1.69381e+09	0.0213587	0.000279597	1.69381e+09	-1.07989e-05
	13	0.027324	0.000396262	5.40175e-06	6.83906e-05	0.0121353	0.0250808	0.000350013	-3.57302e-06	6.37173e-05	0.0112888	0.0233549	0.00031158	-6.83567e-06	6.34952e-05	0.0105936	0.0212392	0.000277014	-6.36735e-06	6.39358e-05	0.0100794			1.69381e+09	0.0273201	0.00039611	1.69381e+09	5.38385e-06	6.8353e-05	0.0121449	1.69381e+09	0.0250657	0.000349842	1.69381e+09	-3.41601e-06	6.37173e-05	0.0112849	1.69381e+09	0.0233478	0.00031153	1.69381e+09	-6.86787e-06	6.35096e-05	0.010619	1.69381e+09	0.0212372	0.000277025	1.69381e+09	-6.27482e-06
	14	0.0275199	0.000402176	2.16829e-06	6.53249e-05	0.0122639	0.0252901	0.000354815	-1.17368e-06	6.81484e-05	0.0113852	0.0231884	0.000311437	-5.55514e-06	6.39292e-05	0.0106635	0.021265	0.000280368	-6.13339e-06	6.12146e-05	0.0102249			1.69381e+09	0.0275345	0.000402371	1.69381e+09	2.14591e-06	6.51111e-05	0.0122777	1.69381e+09	0.025305	0.00035499	1.69381e+09	-8.85376e-07	6.81561e-05	0.0113817	1.69381e+09	0.0231794	0.000311405	1.69381e+09	-5.38294e-06	6.4025e-05	0.0106907	1.69381e+09	0.0212596	0.000280359	1.69381e+09	-6.28527e-06
	15	0.0277275	0.000402471	4.78211e-06	6.15783e-05	0.0121827	0.0254923	0.000355576	4.41011e-06	6.39637e-05	0.0113248	0.023107	0.000310554	-2.0675e-06	6.65493e-05	0.0106628	0.0210899	0.00027672	-1.05728e-05	6.67923e-05	0.0101368			1.69381e+09	0.0277368	0.000402525	1.69381e+09	4.91096e-06	6.16173e-05	0.0121937	1.69381e+09	0.0255054	0.000355644	1.69381e+09	4.37763e-06	6.38978e-05	0.0113179	1.69381e+09	0.0231023	0.000310483	1.69381e+09	-2.07371e-06	6.65132e-05	0.0106865	1.69381e+09	0.0210883	0.000276563	1.69381e+09	-1.05761e-05
	16	0.0279586	0.000405109	8.24959e-06	6.74439e-05	0.0121763	0.0259056	0.000358479	-2.70634e-06	6.44391e-05	0.0112562	0.0229578	0.000307484	-5.85846e-06	6.19036e-05	0.0105985	0.0211906	0.000271807	-6.29074e-06	6.09597e-05	0.00985684			1.69381e+09	0.0279558	0.000405047	1.69381e+09	8.12906e-06	6.74007e-05	0.0121884	1.69381e+09	0.025916	0.000358538	1.69381e+09	-2.98074e-06	6.44907e-05	0.0112503	1.69381e+09	0.022962	0.000307397	1.69381e+09	-5.86859e-06	6.17732e-05	0.0106174	1.69381e+09	0.0211942	0.000271805	1.69381e+09	-6.13962e-06
	17	0.0275925	0.000399121	-9.06911e-07	5.92337e-05	0.0121209	0.0259826	0.000358813	-8.54089e-06	6.68662e-05	0.0112357	0.0233123	0.000305648	-2.56205e-06	5.92155e-05	0.0103586	0.0212587	0.000276611	-3.43977e-06	6.02726e-05	0.0100512			1.69381e+09	0.0275795	0.000399124	1.69381e+09	-1.00891e-06	5.9199e-05	0.0121399	1.69381e+09	0.025986	0.000358741	1.69381e+09	-8.34173e-06	6.68816e-05	0.0112277	1.69381e+09	0.0233285	0.000305669	1.69381e+09	-2.41992e-06	5.94163e-05	0.0103766	1.69381e+09	0.0212556	0.000276716	1.69381e+09	-3.36976e-06
	18	0.0276007	0.000405217	5.42544e-06	6.63396e-05	0.0123382	0.026001	0.000356193	2.80826e-06	6.49299e-05	0.0111269	0.0234081	0.000308159	-1.92284e-06	6.83051e-05	0.0104234	0.0211058	0.000275146	-4.35202e-06	5.91742e-05	0.0100546			1.69381e+09			1.69381e+09				1.69381e+09			1.69381e+09				1.69381e+09			1.69381e+09				1.69381e+09			1.69381e+09
	Cup	C	H3	C	H3		C	H3	C	H3		C	H3	C	H3		C	H3	C	H3
	Info	tbdgy	tbdgy	tbdgy	tbdgy		tbdgy	tbdgy	tbdgy	tbdgy		tbdgy	tbdgy	tbdgy	tbdgy		tbdgy	tbdgy	tbdgy	tbdgy
	Mean	0.0274628	0.000406862	4.05831e-06	6.47248e-05		0.0259515	0.000365934	-1.41378e-06	6.68656e-05		0.0233228	0.000315455	-4.14387e-06	6.4123e-05		0.0212589	0.000280607	-6.32327e-06	6.28715e-05			Mean		0.0274895	0.000406816		4.04552e-06	6.43604e-05			0.0259663	0.000366173		-1.39457e-06	6.69613e-05			0.0233515	0.000315968		-3.97151e-06	6.35572e-05			0.0213082	0.00028111		-6.35929e-06
	StdErr (%)	0.234599	0.304415	18.3155	1.04739		0.340715	0.532856	-89.7112	0.737504		0.263595	0.398572	-15.607	1.0775		0.263689	0.353178	-13.1487	1.08525
		isotope ratio (blank corrected)		30/29				not-blank corr																isotope ratio (blank corrected)		30/29				not-blank corr
		1		0.0124616				0.014815																1		0.0124608				0.014799
		2		0.0115227				0.0141007																2		0.0115213				0.0141018
		3		0.0107745				0.0135256																3		0.0108072				0.013531
		4		0.0102395		29/30		0.0131995																4		0.0102329				0.0131926
		average		0.0112496	V/V	88.8923		0.0139102																average		0.0112556	V/V			0.0139061	V/V
				0.042859				0.0254843																		0.0426859				0.0253004
			S1	0.0742339	urel			0.0441401																	S1	0.0739341	urel			0.0438216
		IDMS blend (bx)
		idms_01		bl_05		30Si/29Si-corr_01	idms_02		bl_06		30Si/29Si-corr_02	idms_03		bl_07		30Si/29Si-corr_03	idms_04		bl_08		30Si/29Si-corr_04			idms_01			bl_05			30Si/29Si-corr_01	idms_02			bl_06			30Si/29Si-corr_02	idms_03			bl_07			30Si/29Si-corr_03	idms_04			bl_08
	Cycle	29.078	30.09	29.078	30.09		29.078	30.09	29.078	30.09		29.078	30.09	29.078	30.09		29.078	30.09	29.078	30.09				time	29.078	30.09	time	29.078	30.09		time	29.078	30.09	time	29.078	30.09		time	29.078	30.09	time	29.078	30.09		time	29.078	30.09	time	29.078
	1	0.0104926	0.0399014	9.61252e-06	6.23412e-05	3.7959	0.009981	0.037942	-3.19033e-06	5.77788e-05	3.79413	0.00956611	0.0363992	-6.96745e-06	5.64124e-05	3.79558	0.00898527	0.0342138	-1.0986e-05	4.69381e-05	3.79784			1.69381e+09			1.69381e+09				1.69382e+09			1.69381e+09				1.69382e+09			1.69382e+09				1.69382e+09			1.69382e+09
	2	0.0106249	0.0403909	-6.91442e-06	5.62009e-05	3.79472	0.00995722	0.0378771	-7.71332e-06	5.73612e-05	3.79667	0.00952465	0.0362293	-1.45484e-05	5.44821e-05	3.79426	0.00925965	0.0352623	-1.31151e-05	5.19282e-05	3.79854			1.69381e+09	0.0106254	0.0403914	1.69381e+09	-7.45854e-06	5.60404e-05	3.79429	1.69382e+09	0.00995563	0.0378731	1.69381e+09	-7.73615e-06	5.726e-05	3.79691	1.69382e+09	0.00952497	0.0362306	1.69382e+09	-1.47208e-05	5.44419e-05	3.79426	1.69382e+09	0.00927464	0.0353113	1.69382e+09	-1.3178e-05
	3	0.0105078	0.0399179	-5.45438e-06	5.72259e-05	3.79198	0.00993699	0.0378141	-3.82241e-06	5.45547e-05	3.79805	0.00957513	0.0364422	-1.17409e-05	5.51303e-05	3.79649	0.00940047	0.0357759	-1.27289e-05	5.28379e-05	3.79627			1.69381e+09	0.0105024	0.0399005	1.69381e+09	-5.37635e-06	5.71791e-05	3.79201	1.69382e+09	0.00994584	0.0378431	1.69381e+09	-3.76928e-06	5.4588e-05	3.79763	1.69382e+09	0.00958619	0.0364792	1.69382e+09	-1.1601e-05	5.52031e-05	3.79595	1.69382e+09	0.00940563	0.0357929	1.69382e+09	-1.26993e-05
	4	0.010359	0.039416	-3.23101e-06	5.36584e-05	3.79798	0.0103896	0.0395096	-5.11775e-06	5.91656e-05	3.79581	0.0100652	0.0383105	-7.71382e-06	5.85763e-05	3.79725	0.00950323	0.0361848	-1.16656e-05	5.13957e-05	3.79825			1.69381e+09	0.0103633	0.0394314	1.69381e+09	-3.2195e-06	5.36757e-05	3.79761	1.69382e+09	0.0104	0.0395441	1.69381e+09	-5.07966e-06	5.91864e-05	3.79534	1.69382e+09	0.0100769	0.0383487	1.69382e+09	-7.728e-06	5.86203e-05	3.79664	1.69382e+09	0.00950597	0.036194	1.69382e+09	-1.16036e-05
	5	0.0107178	0.0407844	-4.91066e-06	5.8164e-05	3.79852	0.0104492	0.0397572	-1.96146e-06	5.56831e-05	3.79783	0.0101449	0.0385913	-1.24334e-05	5.76041e-05	3.79509	0.0095296	0.0362782	-9.69871e-06	6.74999e-05	3.79754			1.69381e+09	0.0107348	0.0408406	1.69381e+09	-5.02957e-06	5.8215e-05	3.79746	1.69382e+09	0.0104528	0.0397697	1.69381e+09	-1.84279e-06	5.55974e-05	3.79777	1.69382e+09	0.010148	0.0386002	1.69382e+09	-1.26056e-05	5.7443e-05	3.79483	1.69382e+09	0.00953111	0.0362825	1.69382e+09	-9.62428e-06
	6	0.0108297	0.0412053	-6.5238e-06	5.52839e-05	3.79816	0.0104874	0.0399073	-1.83161e-06	5.64334e-05	3.7983	0.0101486	0.0385941	-1.24808e-05	5.34448e-05	3.794	0.00954503	0.0363231	-9.60478e-06	5.90661e-05	3.79611			1.69381e+09	0.0108266	0.0411949	1.69381e+09	-6.49706e-06	5.51904e-05	3.79799	1.69382e+09	0.0104864	0.0399043	1.69381e+09	-1.8497e-06	5.64874e-05	3.79844	1.69382e+09	0.0101497	0.0385984	1.69382e+09	-1.24095e-05	5.34115e-05	3.79399	1.69382e+09	0.00954398	0.0363204	1.69382e+09	-9.66032e-06
	7	0.010574	0.0402187	-3.60406e-06	5.29066e-05	3.79668	0.0103987	0.0395963	-2.81508e-06	5.87198e-05	3.80083	0.0101992	0.0388242	-8.95175e-06	5.57282e-05	3.79772	0.00947819	0.0361258	-1.24113e-05	5.30751e-05	3.80206			1.69381e+09	0.0105723	0.0402125	1.69381e+09	-3.55846e-06	5.29421e-05	3.79644	1.69382e+09	0.0103962	0.0395881	1.69381e+09	-2.89326e-06	5.87182e-05	3.80096	1.69382e+09	0.0102007	0.0388292	1.69382e+09	-8.46516e-06	5.6097e-05	3.79765	1.69382e+09	0.00947867	0.0361275	1.69382e+09	-1.24081e-05
	8	0.0107472	0.0408672	-4.29608e-06	5.72809e-05	3.79585	0.0103729	0.0394614	-5.52138e-06	5.63463e-05	3.79726	0.0102191	0.0388683	1.12907e-05	7.41836e-05	3.79466	0.00956855	0.0364194	-9.44839e-06	4.82139e-05	3.79684			1.69381e+09	0.0107622	0.0409179	1.69381e+09	-4.29611e-06	5.73648e-05	3.79499	1.69382e+09	0.0103774	0.0394754	1.69381e+09	-5.62072e-06	5.62553e-05	3.79699	1.69382e+09	0.0102199	0.0388717	1.69382e+09	1.1718e-05	7.4551e-05	3.79468	1.69382e+09	0.00956791	0.0364153	1.69382e+09	-9.34818e-06
	9	0.0109896	0.0418347	-3.60486e-06	5.55812e-05	3.80017	0.0105241	0.0400443	-5.56603e-06	5.58207e-05	3.7981	0.0102223	0.0389344	2.88239e-06	6.74368e-05	3.79994	0.00946046	0.0359944	-9.63657e-06	4.9997e-05	3.7953			1.69381e+09	0.0109939	0.0418492	1.69381e+09	-3.71738e-06	5.55506e-05	3.7997	1.69382e+09	0.01052	0.0400304	1.69381e+09	-5.55307e-06	5.58225e-05	3.79827	1.69382e+09	0.0102202	0.038927	1.69382e+09	2.42066e-06	6.71163e-05	3.79998	1.69382e+09	0.00946005	0.0359934	1.69382e+09	-9.60265e-06
	10	0.0109609	0.041681	-9.60663e-06	5.56199e-05	3.79608	0.0101814	0.0387071	-4.9099e-06	5.64478e-05	3.79461	0.0101177	0.0384529	-1.05057e-05	5.67711e-05	3.79165	0.00954878	0.0363613	-7.84713e-06	5.73731e-05	3.79861			1.69381e+09	0.0109612	0.0416814	1.69381e+09	-9.63138e-06	5.55636e-05	3.79573	1.69382e+09	0.0101732	0.0386797	1.69381e+09	-4.87814e-06	5.64304e-05	3.79498	1.69382e+09	0.0101122	0.0384339	1.69382e+09	-1.0753e-05	5.6561e-05	3.79181	1.69382e+09	0.00955163	0.0363712	1.69382e+09	-7.79195e-06
	11	0.0110063	0.0418578	-4.77319e-06	5.25252e-05	3.79649	0.0101408	0.0385585	-4.067e-06	5.48766e-05	3.79514	0.00995517	0.0378637	-8.79202e-06	5.60221e-05	3.79434	0.00959967	0.0365498	-7.03204e-06	5.59176e-05	3.79812			1.69381e+09	0.011007	0.0418599	1.69381e+09	-4.48442e-06	5.25327e-05	3.79616	1.69382e+09	0.0101491	0.0385868	1.69381e+09	-4.10502e-06	5.47607e-05	3.79484	1.69382e+09	0.00993889	0.0378098	1.69382e+09	-8.79424e-06	5.61063e-05	3.79513	1.69382e+09	0.00960175	0.0365554	1.69382e+09	-7.19915e-06
	12	0.0109807	0.0417486	-1.61065e-06	5.58579e-05	3.79538	0.0104126	0.0396082	-5.96269e-06	5.27541e-05	3.79688	0.00966682	0.0367376	-1.0567e-05	5.94526e-05	3.79104	0.00960638	0.0365406	-1.24742e-05	5.29323e-05	3.7945			1.69381e+09	0.0109811	0.0417498	1.69381e+09	-1.66132e-06	5.59262e-05	3.79511	1.69382e+09	0.0104191	0.0396301	1.69381e+09	-5.95575e-06	5.28294e-05	3.79663	1.69382e+09	0.00967187	0.0367552	1.69382e+09	-1.05702e-05	5.95319e-05	3.79087	1.69382e+09	0.00960669	0.0365416	1.69382e+09	-1.25798e-05
	13	0.011021	0.041923	-7.24877e-06	5.63673e-05	3.79732	0.0104601	0.0397923	-3.72816e-06	5.91136e-05	3.79724	0.0101934	0.0388199	-8.94984e-06	6.04791e-05	3.79947	0.00961413	0.0366042	-1.20162e-05	4.70832e-05	3.79807			1.69381e+09	0.0110219	0.0419263	1.69381e+09	-7.2891e-06	5.64092e-05	3.79705	1.69382e+09	0.0104608	0.0397947	1.69381e+09	-3.62162e-06	5.91678e-05	3.79726	1.69382e+09	0.0102052	0.0388596	1.69382e+09	-8.91521e-06	6.03663e-05	3.79898	1.69382e+09	0.00961483	0.0366076	1.69382e+09	-1.19673e-05
	14	0.0110205	0.0419282	-3.58117e-06	5.82143e-05	3.79799	0.0104458	0.0397433	-7.58082e-07	5.58029e-05	3.79774	0.0102226	0.0388987	-8.87514e-06	5.31116e-05	3.79633	0.00963967	0.0367257	-1.01674e-05	5.01855e-05	3.8006			1.69381e+09	0.0110208	0.0419295	1.69381e+09	-3.41579e-06	5.81204e-05	3.79772	1.69382e+09	0.010445	0.0397396	1.69381e+09	-7.76357e-07	5.56552e-05	3.79773	1.69382e+09	0.0102253	0.0389065	1.69382e+09	-9.08747e-06	5.29873e-05	3.79607	1.69382e+09	0.00963933	0.0367244	1.69382e+09	-1.02342e-05
	15	0.0110305	0.0419638	-2.66923e-06	5.33747e-05	3.79776	0.0104364	0.0396743	-4.23418e-06	5.44051e-05	3.79454	0.0102685	0.0390674	-1.48295e-05	5.65177e-05	3.79577	0.0096046	0.0365634	-1.38665e-05	5.48737e-05	3.79758			1.69381e+09	0.0110273	0.0419525	1.69381e+09	-2.7771e-06	5.33177e-05	3.79758	1.69382e+09	0.0104358	0.0396728	1.69381e+09	-4.31137e-06	5.43827e-05	3.79466	1.69382e+09	0.0102672	0.0390627	1.69382e+09	-1.48982e-05	5.65683e-05	3.79582	1.69382e+09	0.00960165	0.0365538	1.69382e+09	-1.36439e-05
	16	0.0108631	0.0412921	-8.67262e-06	5.51131e-05	3.79446	0.010416	0.0396606	-4.40184e-06	5.45398e-05	3.80069	0.0101557	0.038636	-1.22305e-05	5.59525e-05	3.79548	0.00949595	0.0361908	7.07338e-07	5.75753e-05	3.80179			1.69381e+09	0.010856	0.0412685	1.69381e+09	-8.78538e-06	5.50994e-05	3.79448	1.69382e+09	0.0104175	0.0396655	1.69381e+09	-4.45214e-06	5.45584e-05	3.80064	1.69382e+09	0.0101525	0.0386263	1.69382e+09	-1.21014e-05	5.58747e-05	3.79569	1.69382e+09	0.0094928	0.0361798	1.69382e+09	1.1188e-06
	17	0.0106845	0.0406387	-7.99168e-06	5.26264e-05	3.79672	0.0105072	0.0399373	-6.6085e-06	5.54473e-05	3.79402	0.0101145	0.0385214	-8.5245e-06	5.21437e-05	3.79959	0.00945071	0.0359464	6.23402e-06	6.18942e-05	3.79414			1.69381e+09	0.0106768	0.0406134	1.69381e+09	-7.87487e-06	5.25171e-05	3.79681	1.69382e+09	0.0105087	0.0399422	1.69381e+09	-6.63405e-06	5.56702e-05	3.79398	1.69382e+09	0.0101149	0.0385222	1.69382e+09	-8.46333e-06	5.21525e-05	3.7995	1.69382e+09	0.00944781	0.0359351	1.69382e+09	5.84395e-06
	18	0.01065	0.0404852	-5.43817e-06	5.16286e-05	3.79463	0.0104572	0.0398178	-5.10917e-06	6.16426e-05	3.80073	0.0101668	0.0386592	-1.05367e-05	5.62325e-05	3.79361	0.0094155	0.0358302	-1.0094e-05	5.58267e-05	3.79598			1.69381e+09			1.69381e+09				1.69382e+09			1.69381e+09				1.69382e+09			1.69382e+09				1.69382e+09			1.69382e+09
	Cup	C	H3	C	H3		C	H3	C	H3		C	H3	C	H3		C	H3	C	H3
	Info	tbdgy	tbdgy	tbdgy	tbdgy		tbdgy	tbdgy	tbdgy	tbdgy		tbdgy	tbdgy	tbdgy	tbdgy		tbdgy	tbdgy	tbdgy	tbdgy
	Mean	0.0107811	0.0410031	-4.47327e-06	5.55539e-05		0.0103308	0.0393005	-4.29549e-06	5.64941e-05		0.0100292	0.0381583	-8.58191e-06	5.77601e-05		0.00948366	0.036105	-9.21397e-06	5.41452e-05			Mean		0.0108083	0.0411075		-5.31702e-06	5.53528e-05			0.0103465	0.0393587		-4.31744e-06	5.60856e-05			0.0100509	0.0382413		-8.5609e-06	5.79395e-05			0.00952028	0.0362441		-9.03612e-06
	StdErr (%)	0.470552	0.47391	-21.7682	1.10677		0.450682	0.454102	-9.66134	0.900094		0.601845	0.605329	-17.2362	2.17027		0.387923	0.387726	-12.9115	2.30825
		isotope ratio (blank corrected)		30/29				not-blank corr																isotope ratio (blank corrected)		30/29				not-blank corr
		1		3.79649				3.80323																1		3.79632				3.80332
		2		3.79714				3.8042																2		3.79706				3.80407
		3		3.79568				3.80471																3		3.79574				3.80476
		4		3.79767				3.80707																4		3.79771				3.80705
		average		3.79675	V/V			3.8048																average		3.79671	V/V			3.8048	V/V
				0.000113225				0.00021474																		0.000113295				0.00021145
			S1	0.000196111	urel			0.000371941																	S1	0.000196232	urel			0.000366243
		material w (WASO04)				material: WASO04 41963/04/72-75 part Mi 2.08
		waso_01		bl_09		30Si/29Si-corr_01	waso_02		bl_10		30Si/29Si-corr_02	waso_03		bl_11		30Si/29Si-corr_03	waso_04		bl_12		30Si/29Si-corr_04			waso_01			bl_09			30Si/29Si-corr_01	waso_02			bl_10			30Si/29Si-corr_02	waso_03			bl_11			30Si/29Si-corr_03	waso_04			bl_12
	Cycle	29.078	30.09	29.078	30.09		29.078	30.09	29.078	30.09		29.078	30.09	29.078	30.09		29.078	30.09	29.078	30.09				time	29.078	30.09	time	29.078	30.09		time	29.078	30.09	time	29.078	30.09		time	29.078	30.09	time	29.078	30.09		time	29.078	30.09	time	29.078
	1	0.0501244	0.0353449	-1.58216e-05	5.07674e-05	0.703924	0.0507263	0.0357849	-4.11936e-06	5.51196e-05	0.704298	0.0470688	0.0332054	4.87278e-06	6.36246e-05	0.704233	0.0499766	0.0352639	3.77638e-07	6.2761e-05	0.704425			1.69382e+09			1.69382e+09				1.69382e+09			1.69382e+09				1.69382e+09			1.69382e+09				1.69382e+09			1.69382e+09
	2	0.052002	0.0366868	-9.55391e-06	5.54335e-05	0.704311	0.0523511	0.0369364	-6.52403e-06	5.44727e-05	0.704433	0.0496162	0.0349833	1.01528e-05	6.22144e-05	0.703909	0.051186	0.0360943	5.79682e-06	6.58011e-05	0.704005			1.69382e+09	0.0520981	0.0367456	1.69382e+09	-9.54882e-06	5.54503e-05	0.704144	1.69382e+09	0.0524337	0.0369861	1.69382e+09	-6.61022e-06	5.45768e-05	0.704271	1.69382e+09	0.0497022	0.0350359	1.69382e+09	9.99771e-06	6.23189e-05	0.703758	1.69382e+09	0.0512366	0.0361243	1.69382e+09	5.98585e-06
	3	0.0527846	0.0372202	-1.56806e-05	5.13026e-05	0.703975	0.0530112	0.0373713	-6.50607e-06	5.8439e-05	0.703866	0.0494501	0.0348803	5.77307e-07	6.69549e-05	0.704191	0.05138	0.03622	5.61233e-06	5.93187e-05	0.703792			1.69382e+09	0.0528119	0.037237	1.69382e+09	-1.57081e-05	5.12438e-05	0.703931	1.69382e+09	0.0529943	0.0373604	1.69382e+09	-6.4315e-06	5.85023e-05	0.703883	1.69382e+09	0.0494507	0.0348807	1.69382e+09	5.0682e-07	6.69568e-05	0.7042	1.69382e+09	0.0513628	0.0362094	1.69382e+09	5.56028e-06
	4	0.0533353	0.0376282	-1.08943e-05	5.2124e-05	0.704355	0.0515517	0.0363432	-3.00415e-06	5.80295e-05	0.70385	0.0496466	0.0350045	6.70931e-06	6.23194e-05	0.703904	0.050346	0.0355007	3.34005e-06	6.20134e-05	0.70396			1.69382e+09	0.0533465	0.0376349	1.69382e+09	-1.08599e-05	5.21769e-05	0.704336	1.69382e+09	0.0515308	0.0363306	1.69382e+09	-2.94499e-06	5.78842e-05	0.703889	1.69382e+09	0.0496593	0.0350121	1.69382e+09	6.76064e-06	6.2251e-05	0.703887	1.69382e+09	0.0503395	0.0354969	1.69382e+09	3.25462e-06
	5	0.0533309	0.037597	-1.39993e-05	5.42731e-05	0.703827	0.0520256	0.0366881	-3.71351e-06	5.0268e-05	0.704069	0.0500497	0.0352936	3.08449e-06	6.31056e-05	0.704011	0.0510649	0.036007	1.58005e-06	6.17454e-05	0.703963			1.69382e+09	0.0533325	0.0375969	1.69382e+09	-1.42388e-05	5.42525e-05	0.703809	1.69382e+09	0.0520841	0.0367242	1.69382e+09	-3.79622e-06	5.02489e-05	0.703968	1.69382e+09	0.0500955	0.0353218	1.69382e+09	2.99228e-06	6.3103e-05	0.703941	1.69382e+09	0.0511304	0.0360478	1.69382e+09	1.53689e-06
	6	0.0533791	0.0376277	-1.75265e-05	5.14658e-05	0.703768	0.0531736	0.0374936	-5.29436e-06	5.74204e-05	0.704017	0.0509131	0.0359045	4.15606e-06	6.22348e-05	0.704072	0.0521611	0.0368031	2.1449e-06	6.2995e-05	0.704432			1.69382e+09	0.0533838	0.0376306	1.69382e+09	-1.74765e-05	5.14731e-05	0.703763	1.69382e+09	0.0532114	0.0375165	1.69382e+09	-5.25388e-06	5.75642e-05	0.703944	1.69382e+09	0.0509516	0.0359279	1.69382e+09	4.23163e-06	6.21946e-05	0.704009	1.69382e+09	0.0522081	0.0368318	1.69382e+09	2.30728e-06
	7	0.053564	0.0377608	-1.16412e-05	5.46656e-05	0.703824	0.0538733	0.0379721	-1.73587e-06	5.80806e-05	0.703753	0.0519341	0.0366131	6.6519e-06	6.09202e-05	0.703876	0.0533607	0.0376207	9.24343e-06	6.14175e-05	0.703917			1.69382e+09	0.0535487	0.0377512	1.69382e+09	-1.14049e-05	5.46524e-05	0.703847	1.69382e+09	0.0538934	0.0379843	1.69382e+09	-1.71954e-06	5.80018e-05	0.703717	1.69382e+09	0.0519689	0.0366341	1.69382e+09	6.75004e-06	6.09425e-05	0.703816	1.69382e+09	0.0533852	0.0376356	1.69382e+09	9.2961e-06
	8	0.0526317	0.0370833	-6.37232e-06	5.07504e-05	0.703419	0.0541526	0.0381825	-4.49673e-06	5.31426e-05	0.704011	0.0526165	0.0370835	8.78859e-06	6.34486e-05	0.703685	0.0533582	0.0376391	4.63077e-06	6.85117e-05	0.704296			1.69382e+09	0.0525633	0.0370417	1.69382e+09	-6.42705e-06	5.07279e-05	0.703546	1.69382e+09	0.0541684	0.0381925	1.69382e+09	-4.43551e-06	5.31182e-05	0.703987	1.69382e+09	0.0526213	0.0370867	1.69382e+09	8.96725e-06	6.34041e-05	0.703692	1.69382e+09	0.05336	0.0376399	1.69382e+09	5.0654e-06
	9	0.0516724	0.0364366	-1.31565e-05	5.3947e-05	0.703961	0.0543126	0.0382896	-4.05358e-08	5.73027e-05	0.703909	0.0520653	0.0367162	1.1599e-05	5.95017e-05	0.70408	0.0534116	0.0376466	2.12786e-05	7.63338e-05	0.703731			1.69382e+09	0.0516967	0.0364514	1.69382e+09	-1.32214e-05	5.39992e-05	0.703921	1.69382e+09	0.0543121	0.0382891	1.69382e+09	-1.21659e-07	5.73094e-05	0.703904	1.69382e+09	0.0520563	0.0367106	1.69382e+09	1.15549e-05	5.949e-05	0.704104	1.69382e+09	0.0534182	0.03765	1.69382e+09	2.12601e-05
	10	0.0537751	0.0378886	-9.54151e-06	5.36856e-05	0.703437	0.0541288	0.0381553	-8.45905e-06	5.35235e-05	0.703817	0.0521913	0.0367799	6.63393e-06	6.27904e-05	0.703601	0.053667	0.0378284	3.72585e-06	6.18779e-05	0.703771			1.69382e+09	0.0538261	0.0379191	1.69382e+09	-9.43588e-06	5.36081e-05	0.70334	1.69382e+09	0.054128	0.0381545	1.69382e+09	-8.50962e-06	5.34761e-05	0.703812	1.69382e+09	0.0521918	0.0367799	1.69382e+09	6.53778e-06	6.275e-05	0.703605	1.69382e+09	0.0536695	0.0378302	1.69382e+09	3.33473e-06
	11	0.0540802	0.0380931	-7.99567e-06	4.9591e-05	0.703251	0.0542726	0.038247	-2.51087e-06	5.46395e-05	0.703641	0.0520902	0.036721	6.90223e-06	5.72271e-05	0.703837	0.0535308	0.0377448	2.17082e-06	6.09663e-05	0.704			1.69382e+09	0.0540968	0.0381038	1.69382e+09	-7.79295e-06	4.95878e-05	0.703235	1.69382e+09	0.0542386	0.0382264	1.69382e+09	-2.27972e-06	5.46663e-05	0.703703	1.69382e+09	0.0520696	0.0367084	1.69382e+09	6.64196e-06	5.71947e-05	0.703884	1.69382e+09	0.0535221	0.0377397	1.69382e+09	2.20092e-06
	12	0.0542341	0.0382279	-3.92813e-06	5.35866e-05	0.70374	0.0531859	0.0375015	-2.05828e-06	5.43754e-05	0.704002	0.0516199	0.0363796	-5.73025e-07	6.17594e-05	0.703635	0.0534261	0.0376649	4.55936e-06	6.46717e-05	0.703884			1.69382e+09	0.0542418	0.038233	1.69382e+09	-3.92399e-06	5.37086e-05	0.703737	1.69382e+09	0.0531602	0.037486	1.69382e+09	-2.15455e-06	5.43038e-05	0.70405	1.69382e+09	0.0515975	0.0363659	1.69382e+09	-5.75737e-07	6.18567e-05	0.703686	1.69382e+09	0.0534033	0.0376508	1.69382e+09	4.66482e-06
	13	0.0544608	0.0383807	-7.80018e-06	5.62195e-05	0.703616	0.0530608	0.0374086	-7.0557e-06	5.07502e-05	0.703911	0.0510324	0.035979	6.7742e-06	6.25137e-05	0.703887	0.0524137	0.0369494	7.32325e-06	6.21489e-05	0.703828			1.69382e+09	0.0544672	0.0383848	1.69382e+09	-7.91792e-06	5.62623e-05	0.703613	1.69382e+09	0.0530694	0.0374134	1.69382e+09	-7.18242e-06	5.07705e-05	0.703886	1.69382e+09	0.0510163	0.0359692	1.69382e+09	6.96522e-06	6.24774e-05	0.703925	1.69382e+09	0.0524056	0.0369444	1.69382e+09	7.281e-06
	14	0.054549	0.0384631	-9.48589e-06	5.59088e-05	0.703989	0.053591	0.0377633	-8.04076e-06	5.54779e-05	0.703567	0.0508632	0.0358439	8.44346e-06	5.97885e-05	0.703573	0.05303	0.0373839	2.49539e-06	5.79625e-05	0.703841			1.69382e+09	0.0545512	0.0384643	1.69382e+09	-9.63295e-06	5.57987e-05	0.703986	1.69382e+09	0.0535937	0.037765	1.69382e+09	-8.02e-06	5.56736e-05	0.703559	1.69382e+09	0.0508365	0.0358272	1.69382e+09	8.30766e-06	5.97594e-05	0.703622	1.69382e+09	0.0530071	0.0373694	1.69382e+09	2.3919e-06
	15	0.0545198	0.0384175	-1.18721e-05	5.27125e-05	0.70353	0.0531369	0.0374604	-6.48079e-06	5.69844e-05	0.703877	0.0502947	0.0354466	3.01389e-06	6.15875e-05	0.703626	0.051779	0.036489	4.45757e-06	6.45612e-05	0.703564			1.69382e+09	0.0544587	0.03838	1.69382e+09	-1.18745e-05	5.26898e-05	0.703634	1.69382e+09	0.0531549	0.0374717	1.69382e+09	-6.46187e-06	5.69371e-05	0.703851	1.69382e+09	0.0502904	0.0354444	1.69382e+09	2.98094e-06	6.15848e-05	0.70365	1.69382e+09	0.0517442	0.0364678	1.69382e+09	4.50512e-06
	16	0.0516653	0.0364244	-9.60412e-06	5.46345e-05	0.703823	0.0544966	0.0384218	-7.08542e-06	5.29098e-05	0.703957	0.0506559	0.0357176	6.83384e-06	5.96387e-05	0.703957	0.0513909	0.0362319	4.73939e-06	6.25531e-05	0.703875			1.69382e+09	0.0516266	0.0364009	1.69382e+09	-9.65858e-06	5.46533e-05	0.703898	1.69382e+09	0.0545269	0.0384402	1.69382e+09	-7.0739e-06	5.28966e-05	0.703903	1.69382e+09	0.0506912	0.0357396	1.69382e+09	6.86784e-06	5.96163e-05	0.703911	1.69382e+09	0.0513938	0.0362342	1.69382e+09	4.78843e-06
	17	0.0526914	0.0371385	-1.4532e-05	5.37706e-05	0.703669	0.0546635	0.0385315	-5.89898e-06	5.62688e-05	0.703816	0.0520191	0.0366852	4.67447e-06	6.03261e-05	0.704112	0.0519152	0.0366133	6.77194e-06	6.07911e-05	0.704113			1.69382e+09	0.0527943	0.0372011	1.69382e+09	-1.45801e-05	5.37996e-05	0.703487	1.69382e+09	0.0546781	0.0385406	1.69382e+09	-5.78027e-06	5.63327e-05	0.703792	1.69382e+09	0.0520811	0.0367228	1.69382e+09	4.37202e-06	6.0429e-05	0.704003	1.69382e+09	0.0519807	0.0366535	1.69382e+09	6.96382e-06
	18	0.0545143	0.0384207	-1.0936e-05	5.55587e-05	0.703661	0.0549007	0.0387109	-3.79824e-06	5.49463e-05	0.704043	0.0523744	0.0369142	-1.54168e-06	6.2918e-05	0.703706	0.053204	0.0375121	1.00523e-05	5.89028e-05	0.703951			1.69382e+09			1.69382e+09				1.69382e+09			1.69382e+09				1.69382e+09			1.69382e+09				1.69382e+09			1.69382e+09
	Cup	C	H3	C	H3		C	H3	C	H3		C	H3	C	H3		C	H3	C	H3
	Info	tbdgy	tbdgy	tbdgy	tbdgy		tbdgy	tbdgy	tbdgy	tbdgy		tbdgy	tbdgy	tbdgy	tbdgy		tbdgy	tbdgy	tbdgy	tbdgy
	Mean	0.0531841	0.0374911	-1.11301e-05	5.33554e-05		0.0533675	0.0376257	-4.82348e-06	5.51195e-05		0.0509167	0.0358973	5.43076e-06	6.18263e-05		0.0522557	0.0368452	5.57225e-06	6.30741e-05			Mean		0.0533028	0.0375735		-1.08564e-05	5.33803e-05			0.0534486	0.0376801		-4.92349e-06	5.51414e-05			0.05108	0.0360105		5.86618e-06	6.16456e-05			0.0523479	0.0369079		5.64983e-06
	StdErr (%)	0.543701	0.539313	-7.51193	0.871379		0.502096	0.498099	-11.5586	1.02902		0.650455	0.646035	15.3728	0.803878		0.530936	0.528242	19.8067	1.55184
		isotope ratio (blank corrected)		30/29				not-blank corr																isotope ratio (blank corrected)		30/29				not-blank corr
		1		0.703782				0.70493																1		0.703764				0.704907
		2		0.703935				0.70503																2		0.703883				0.704978
		3		0.703883				0.705019																3		0.703856				0.704981
		4		0.703964				0.705094																4		0.703914				0.705049
		average		0.703891	V/V			0.705018																average		0.703854	V/V			0.704979	V/V
				5.67846e-05				4.78938e-05																		4.59071e-05				4.09923e-05
			S1	9.83538e-05	urel			8.29545e-05																	S1	7.95133e-05	urel			7.10008e-05
[truncated: 2 more columns]

## Sheet: Molar Mass no tau corr
Molar Mass calculation (overview)
		molar masses of Si isotopes		M(29Si)	28.9765	g/mol		blue: measured quantities
		(AME 2020)		M(30Si)	29.9738	g/mol
				M(28Si)	27.9769	g/mol
10^13 Ohm, no rot		Meng Wang et al 2021 Chinese Phys. C 45 030003
sample	run	Ry,2true	Ry,3true	Rw,2true	Rw,2meas	K2	mx1	myx1	Rxmeas	Rbxmeas	M(Si28)	u(M)	urel(M)	wy	wimp	x(28Si)	u(x(28Si))	x(29Si)	u(x(29Si))	x(30Si)	u(x(30Si))
SIS code	sequence	mol/mol	mol/mol	mol/mol	V/V	1	g	g	V/V	V/V	g/mol	g/mol		g/g	g/g	mol/mol	mol/mol	mol/mol		mol/mol
Si28-33Pr11 N.2.1	1	269.039	1.58552	0.662302	0.702763	0.942425	0.062475	5.61102e-06	0.010232	3.81288	27.9769	4.97e-08	1.77646e-09	0.994549	2.39247e-05	0.999977	4.86e-08	2.28713e-05	4.8e-08	2.20545e-07	5.66e-09
Si28-33Pr11 N.2.1	2	269.039	1.58552	0.662302	0.705592	0.938647	0.062475	5.61102e-06	0.0113951	3.81993	27.9769	5.06e-08	1.80863e-09	0.994549	2.40104e-05	0.999977	4.91e-08	2.29285e-05	4.84e-08	2.45243e-07	6.38e-09
Si28-33Pr11 N.2.1	3	269.039	1.58552	0.662302	0.704254	0.94043	0.062475	5.61102e-06	0.0115116	3.80959	27.9769	5.46e-08	1.95161e-09	0.994549	2.40343e-05	0.999977	5.07e-08	2.29483e-05	4.89e-08	2.48435e-07	1.07e-08
Si28-33Pr11 N.2.1	4	269.039	1.58552	0.662302	0.705017	0.939413	0.062475	5.61102e-06	0.0104005	3.82259	27.9769	5.29e-08	1.89084e-09	0.994549	2.39447e-05	0.999977	4.98e-08	2.28874e-05	4.84e-08	2.23619e-07	9.46e-09
Si28-33Pr11 N.2.1	5	269.039	1.58552	0.662302	0.707102	0.936642	0.062475	5.61102e-06	0.0101066	3.84828	27.9769	5.85e-08	2.09101e-09	0.994549	2.38443e-05	0.999977	5.2e-08	2.27986e-05	4.88e-08	2.15817e-07	1.42e-08
Si28-33Pr11 N.2.1	6	269.039	1.58552	0.662302	0.703891	0.940915	0.062475	5.61102e-06	0.0112496	3.79675	27.977	6.36e-08	2.2733e-09	0.994549	2.40968e-05	0.999977	5.36e-08	2.30136e-05	4.86e-08	2.43596e-07	1.81e-08
										av	27.9769	5.51924e-08	1.97278e-09			0.999977	5.06627e-08	2.29079e-05	4.85176e-08	2.32876e-07	1.159e-08

## Sheet: Molar Mass with tau corr
Molar Mass calculation (overview)
with tau correction
		molar masses of Si isotopes		M(29Si)	28.9765	g/mol		blue: measured quantities
		(AME 2020)		M(30Si)	29.9738	g/mol
				M(28Si)	27.9769	g/mol
10^13 Ohm, no rot		Meng Wang et al 2021 Chinese Phys. C 45 030003
sample	run	Ry,2true	Ry,3true	Rw,2true	Rw,2meas	K2	mx1	myx1	Rxmeas	Rbxmeas	M(Si28)	u(M)	urel(M)	wy	wimp	x(28Si)	u(x(28Si))	x(29Si)	u(x(29Si))	x(30Si)	u(x(30Si))
SIS code	sequence	mol/mol	mol/mol	mol/mol	V/V	1	g	g	V/V	V/V	g/mol	g/mol		g/g	g/g	mol/mol	mol/mol	mol/mol		mol/mol
Si28-33Pr11 N.2.1	1	269.039	1.58552	0.662302	0.702732	0.942467	0.062475	5.61102e-06	0.0102264	3.81275	27.9769	4.95e-08	1.76931e-09	0.994549	2.39243e-05	0.999977	4.85e-08	2.2871e-05	4.81e-08	2.20433e-07	5.2e-09
Si28-33Pr11 N.2.1	2	269.039	1.58552	0.662302	0.705598	0.938639	0.062475	5.61102e-06	0.0113952	3.81986	27.9769	5.04e-08	1.80148e-09	0.994549	2.40111e-05	0.999977	4.9e-08	2.29291e-05	4.83e-08	2.4525e-07	6.25e-09
Si28-33Pr11 N.2.1	3	269.039	1.58552	0.662302	0.704236	0.940455	0.062475	5.61102e-06	0.0115095	3.8096	27.9769	5.46e-08	1.95161e-09	0.994549	2.40336e-05	0.999977	5.08e-08	2.29476e-05	4.9e-08	2.48388e-07	1.06e-08
Si28-33Pr11 N.2.1	4	269.039	1.58552	0.662302	0.705021	0.939407	0.062475	5.61102e-06	0.0104042	3.8226	27.9769	5.28e-08	1.88727e-09	0.994549	2.39449e-05	0.999977	4.97e-08	2.28875e-05	4.83e-08	2.23697e-07	9.42e-09
Si28-33Pr11 N.2.1	5	269.039	1.58552	0.662302	0.707115	0.936625	0.062475	5.61102e-06	0.0101189	3.84815	27.9769	5.84e-08	2.08743e-09	0.994549	2.38459e-05	0.999977	5.19e-08	2.27998e-05	4.87e-08	2.16088e-07	1.43e-08
Si28-33Pr11 N.2.1	6	269.039	1.58552	0.662302	0.703854	0.940964	0.062475	5.61102e-06	0.0112556	3.79671	27.977	6.35e-08	2.26973e-09	0.994549	2.40959e-05	0.999977	5.36e-08	2.30126e-05	4.85e-08	2.43729e-07	1.81e-08
										av	27.9769	5.50791e-08	1.96873e-09			1	5.06138e-08	2.29079e-05	4.84842e-08	2.32931e-07	1.15419e-08
